# Supplementary material for: Randomised, double-blind, placebo-controlled clinical trial investigating the effects of inorganic nitrate in hypertension-induced target organ damage: protocol of the NITRATE-TOD study in the UK
Source: PubMed Central journal article supplement — BMJ Open. 2020 Jan 21;10(1):e034399. doi: 10.1136/bmjopen-2019-034399 (PMC7045137; doi:10.1136/bmjopen-2019-034399), 2020-01-21
Supplement: bmjopen-2019-034399.draft_revisions.pdf [file bmjopen-2019-034399.draft_revisions.pdf]

# BMJ Open

BMJ Open is committed to open peer review. As part of this commitment we make the peer review history of every article we publish publicly available.

When an article is published we post the peer reviewers' comments and the authors' responses online. We also post the versions of the paper that were used during peer review. These are the versions that the peer review comments apply to.

The versions of the paper that follow are the versions that were submitted during the peer review process. They are not the versions of record or the final published versions. They should not be cited or distributed as the published version of this manuscript.

BMJ Open is an open access journal and the full, final, typeset and author-corrected version of record of the manuscript is available on our site with no access controls, subscription charges or pay-per-view fees (<http://bmjopen.bmj.com>).

If you have any questions on BMJ Open's open peer review process please email [info.bmjopen@bmj.com](mailto:info.bmjopen@bmj.com)

# BMJ Open

## **RANDOMISED, DOUBLE-BLIND, PLACEBO-CONTROLLED CLINICAL TRIAL INVESTIGATING THE EFFECTS OF INORGANIC NITRATE IN HYPERTENSION-INDUCED TARGET ORGAN DAMAGE: PROTOCOL OF THE NITRATE-TOD STUDY**

|                               |                                                                                                                                                                                                                                                                                                                                                                                                                                                                                                                                                                                                                                                                                                                                                                                                                                                                                                                                                                                                                                                                                                                                                                                                                                                                                                                                                                                                                                                                                                                                                                                                                                                                                                                                                                                                                                                   |
|-------------------------------|---------------------------------------------------------------------------------------------------------------------------------------------------------------------------------------------------------------------------------------------------------------------------------------------------------------------------------------------------------------------------------------------------------------------------------------------------------------------------------------------------------------------------------------------------------------------------------------------------------------------------------------------------------------------------------------------------------------------------------------------------------------------------------------------------------------------------------------------------------------------------------------------------------------------------------------------------------------------------------------------------------------------------------------------------------------------------------------------------------------------------------------------------------------------------------------------------------------------------------------------------------------------------------------------------------------------------------------------------------------------------------------------------------------------------------------------------------------------------------------------------------------------------------------------------------------------------------------------------------------------------------------------------------------------------------------------------------------------------------------------------------------------------------------------------------------------------------------------------|
| Journal:                      | <i>BMJ Open</i>                                                                                                                                                                                                                                                                                                                                                                                                                                                                                                                                                                                                                                                                                                                                                                                                                                                                                                                                                                                                                                                                                                                                                                                                                                                                                                                                                                                                                                                                                                                                                                                                                                                                                                                                                                                                                                   |
| Manuscript ID                 | bmjopen-2019-034399                                                                                                                                                                                                                                                                                                                                                                                                                                                                                                                                                                                                                                                                                                                                                                                                                                                                                                                                                                                                                                                                                                                                                                                                                                                                                                                                                                                                                                                                                                                                                                                                                                                                                                                                                                                                                               |
| Article Type:                 | Protocol                                                                                                                                                                                                                                                                                                                                                                                                                                                                                                                                                                                                                                                                                                                                                                                                                                                                                                                                                                                                                                                                                                                                                                                                                                                                                                                                                                                                                                                                                                                                                                                                                                                                                                                                                                                                                                          |
| Date Submitted by the Author: | 19-Sep-2019                                                                                                                                                                                                                                                                                                                                                                                                                                                                                                                                                                                                                                                                                                                                                                                                                                                                                                                                                                                                                                                                                                                                                                                                                                                                                                                                                                                                                                                                                                                                                                                                                                                                                                                                                                                                                                       |
| Complete List of Authors:     | <p>Lau, Clement; William Harvey Research Institute, Barts NIHR Cardiovascular Biomedical Research Unit, Centre of Clinical Pharmacology, Queen Mary University of London; Barts Health NHS Trust Hamers, Alexander Jozua Pedro ; William Harvey Research Institute, Barts NIHR Cardiovascular Biomedical Research Unit, Centre of Clinical Pharmacology, Queen Mary University of London</p> <p>Rathod, Krishnaraj; William Harvey Research Institute, Barts NIHR Cardiovascular Biomedical Research Unit, Centre of Clinical Pharmacology, Queen Mary University of London; Barts Health NHS Trust Shabbir, Asad; William Harvey Research Institute, Barts NIHR Cardiovascular Biomedical Research Unit, Centre of Clinical Pharmacology, Queen Mary University of London</p> <p>Cooper, Jackie; William Harvey Research Institute, Barts NIHR Cardiovascular Biomedical Research Unit, Centre of Clinical Pharmacology, Queen Mary University of London</p> <p>Primus, Christopher; William Harvey Research Institute, Barts NIHR Cardiovascular Biomedical Research Unit, Centre of Clinical Pharmacology, Queen Mary University of London; Barts Health NHS Trust Davies, Ceri; William Harvey Research Institute; Barts Health NHS Trust Mathur, Anthony; William Harvey Research Institute; Barts Health NHS Trust</p> <p>Moon, James; UCL Institute of Cardiovascular Science, University College London, Gower Street, London; Barts Health NHS Trust</p> <p>Kapil, Vikas; William Harvey Research Institute, Barts NIHR Cardiovascular Biomedical Research Unit, Centre of Clinical Pharmacology, Queen Mary University of London; Barts Health NHS Trust Ahluwalia, Amrita; William Harvey Research Institute, Barts NIHR Cardiovascular Biomedical Research Unit, Centre of Clinical Pharmacology, Queen Mary University of London</p> |
| Keywords:                     | Hypertension < RADIOLOGY, Cardiovascular imaging < RADIOLOGY & IMAGING, CLINICAL PHARMACOLOGY, Clinical trials < THERAPEUTICS                                                                                                                                                                                                                                                                                                                                                                                                                                                                                                                                                                                                                                                                                                                                                                                                                                                                                                                                                                                                                                                                                                                                                                                                                                                                                                                                                                                                                                                                                                                                                                                                                                                                                                                     |
|                               |                                                                                                                                                                                                                                                                                                                                                                                                                                                                                                                                                                                                                                                                                                                                                                                                                                                                                                                                                                                                                                                                                                                                                                                                                                                                                                                                                                                                                                                                                                                                                                                                                                                                                                                                                                                                                                                   |

1  
2  
3  
4  
5  
6  
7  
8  
9  
10  
11  
12  
13  
14  
15  
16  
17  
18  
19  
20  
21  
22  
23  
24  
25  
26  
27  
28  
29  
30  
31  
32  
33  
34  
35  
36  
37  
38  
39  
40  
41  
42  
43  
44  
45  
46  
47  
48  
49  
50  
51  
52  
53  
54  
55  
56  
57  
58  
59  
60

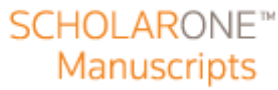

1  
2  
3 **RANDOMISED, DOUBLE-BLIND, PLACEBO-CONTROLLED CLINICAL TRIAL INVESTIGATING THE**  
4 **EFFECTS OF INORGANIC NITRATE IN HYPERTENSION-INDUCED TARGET ORGAN DAMAGE:**  
5 **PROTOCOL OF THE NITRATE-TOD STUDY**  
6  
7  
8  
9

10 Lau CWZ<sup>1</sup>, Hamers AJP<sup>1</sup>, Rathod KS<sup>1</sup>, Shabbir A<sup>1</sup>, Cooper J<sup>1</sup>, Primus C<sup>1</sup>, Davies C<sup>1</sup>, Mathur A<sup>1</sup>, Moon JC<sup>2</sup>,  
11 Kapil V<sup>1,3</sup>, Ahluwalia A<sup>1</sup>  
12  
13  
14

15 <sup>1</sup>William Harvey Research Institute, Barts and the London School of Medicine and Dentistry, Queen  
16 Mary University of London, London, United Kingdom.

17 <sup>2</sup>Institute of Cardiovascular Science, University College London, London, United Kingdom; Barts Heart  
18 Centre, West Smithfield, London, United Kingdom.  
19

20 <sup>3</sup>Barts BP Centre of Excellence, Barts Heart Centre, Barts Health NHS Trust, London, United Kingdom.  
21  
22  
23

24  
25 **Corresponding author:**

26 Professor Amrita Ahluwalia

27 William Harvey Research Institute

28 Barts and The London School of Medicine and Dentistry

29 Queen Mary University of London

30 Charterhouse Square

31 London, EC1M 6BQ

32 United Kingdom

33 Tel: +44 207 882 8377

34 Email: [a.ahluwalia@qmul.ac.uk](mailto:a.ahluwalia@qmul.ac.uk)  
35  
36  
37  
38  
39  
40  
41  
42  
43

44 Word count: 4,565  
45  
46  
47  
48  
49  
50  
51  
52  
53  
54  
55  
56  
57  
58  
59  
60

## **ABSTRACT**

### **Introduction**

Arterial stiffness and left ventricular hypertrophy (LVH) are key markers of hypertensive target organ damage (TOD) associated with increased cardiovascular morbidity and mortality. We have previously shown that dietary inorganic nitrate supplementation lowers blood pressure (BP) in hypertension, however, whether this approach might also improve markers of hypertensive TOD is unknown. In this study, we will investigate whether daily dietary inorganic nitrate administration reduces left ventricular (LV) mass and improves measures of arterial stiffness.

### **Methods and Design**

NITRATE-TOD is a double-blind, randomised, single-centre, placebo-controlled phase II trial aiming to enrol 160 patients with suboptimal BP control on 1 or more anti-hypertensives. Patients will be randomised to receive 4-month once daily dose of either nitrate-rich beetroot juice or nitrate-deplete beetroot juice (placebo). The primary outcomes are reduction in LV mass and reduction in pulse wave velocity (PWV) and central blood pressure (CBP).

The study has a power of 95% for detecting a 9g LV mass change by cardiovascular magnetic resonance (CMR) imaging (~6% change for a mildly hypertrophied heart of 150g). For PWV we have a power of > 95% for detecting a 0.6 m/s absolute change. For central systolic BP, we have a > 90% power to detect a 5.8 mm Hg difference in central systolic BP.

Secondary end-points include change in ultrasound flow mediated dilatation (FMD), change in plasma nitrate and nitrite concentration and change in BP.

### **Ethics and Dissemination**

The study was approved by the London – City and East Research Ethics Committee (10/H0703/98). Trial results will be published according to the CONSORT statement and will be presented at conferences and reported in peer-reviewed journals.

ClinicalTrials.gov identifier: NCT03088514

### **Strengths and limitations of this study**

- This is a randomised, placebo-controlled double-blind clinical trial assessing the potential of dietary nitrate in reducing both cardiac and vascular damage due to persistently elevated blood pressure.
- Dietary nitrate is a simple, easy to use and safe intervention that may be more acceptable to patients on long term medication for their blood pressure.
- This is a single-centre phase II study; therefore, the applicability to other centres is uncertain.

For peer review only

## INTRODUCTION

Hypertension is the leading risk factor for cardiovascular diseases (CVD) worldwide.[1,2] In 2016, an estimated 17.9 million people died from CVDs, which represents 31% of all global deaths.[3] Approximately half of these deaths were caused by complications from hypertension.[4] Hence, novel and cost-effective therapeutic strategies continue to be sought. In this regard there has been a major emphasis to increase vegetable intake since increased consumption of a vegetable-rich diet particularly green leafy vegetables confers protection against CVD, including the lowering of BP[5,6]. One particular constituent of such vegetables that has been proposed to underlie the beneficial effects of this food group is inorganic nitrate; through bioconversion to nitrite, and then nitrite to nitric oxide (NO)[7] in the body. Importantly, provision of inorganic nitrate to hypertensive patients causes a rise in plasma nitrate and is associated with a decrease in BP.[8,9]

Dietary inorganic nitrate once ingested rapidly enters the circulation[8–10] with a proportion of this nitrate being extracted and then secreted and concentrated in the saliva.[11] Bacteria residing in the oral cavity convert this nitrate to nitrite which is then swallowed;[12] appearing soon after within the circulation. We have recently shown that daily supplementation with dietary nitrate (providing approximately 6.4 mmol nitrate daily) for 4 weeks was associated with robust, sustained and clinically meaningful reductions in BP (measured by clinic, ambulatory and home methods) of ~8/4 mm Hg.[13] However, persistent hypertension leads to both vascular and cardiac remodelling and whether inorganic nitrate-induced reductions in BP might be associated with improvements in either of these in the long term is unknown. Experimentally in patients one can assess this potential through the measurement of arterial stiffness and LV mass respectively, with increases of either conferring increased CV risk. Arterial stiffness (and its inverse measure, distensibility) refers to the decreased elasticity that develops in arteries as a consequence of vascular remodelling resulting from alterations of the fibrous components of the extracellular matrix (including elastin and collagen).[14] Importantly, increased arterial stiffness, as measured using carotid-femoral PWV,[15] is a strong predictor of CV events,[16] and there have been suggestions that drug development targeting this phenomenon is likely to provide a new genre of therapeutics in the combat against CVD.[17] Additionally, an increased central pulse pressure occurs when the large conduit blood vessels lose their elasticity and become less able to accommodate all of the blood ejected from the heart. This increase in pressure results in an increase in central systolic BP and causes an increase in the stress imposed on the left ventricle, which in turn can result in left ventricular hypertrophy (LVH).[18] Elevated LV mass is an initial compensatory mechanism to normalise wall stress due to elevated BP.

1  
2  
3 However, this cardiac remodelling eventually becomes maladaptive with an increase in myocardial  
4 oxygen consumption, cardiac chamber dilation, reduced LV contractility and progressive deterioration  
5 to heart failure.[19] The measure of LVH as a prognostic indicator of adverse outcome was first  
6 convincingly identified in the Framingham study,[20] and numerous studies since have confirmed the  
7 strong relationship between LVH and CV events and mortality.[21,22] Perhaps, more importantly, LV  
8 mass reduction is associated with further improvements in CV outcomes.[23,24]  
9

10  
11  
12  
13  
14  
15 It has been proposed that insufficient supply of endogenous NO likely contributes to the progression  
16 and worsening of arterial stiffness and LVH.[25] Pre-clinical studies have demonstrated that an  
17 elevation of systemic nitrite levels reduces cardiac hypertrophy in mice.[26] Moreover, administration  
18 of inorganic nitrate reduces PWV healthy volunteers and hypertensive patients in short term  
19 studies.[13,27]  
20  
21  
22  
23  
24

25 The objective of this study is to determine whether a dietary nitrate intervention might elevate the  
26 levels of NO in the body sufficiently to alter both heart and blood vessel remodelling in hypertensive  
27 patients with suboptimal BP control.  
28  
29  
30  
31  
32  
33  
34  
35  
36  
37  
38  
39  
40  
41  
42  
43  
44  
45  
46  
47  
48  
49  
50  
51  
52  
53  
54  
55  
56  
57  
58  
59  
60



## **METHODOLOGY**

### **Trial objectives**

*Aims of research:* We wish to test the hypothesis that dietary supplementation of inorganic nitrate (in beetroot juice) elevates circulating nitrate and nitrite levels ultimately delivering NO to the vasculature and thereby improving endothelial, vascular and cardiac function in patients with treated yet uncontrolled hypertension. Specifically, the aim is to investigate whether prolonged dietary nitrate ingestion in hypertensive patients with suboptimal BP control, can cause reductions in LV mass and PWV.

### **Participant selection**

This is a single-centre study, in which patients will be identified and recruited at Barts Health NHS Trust. In addition, other participant identification centres will be used to identify suitable participants via the NIHR Clinical Research Network and local NHS Trusts.

### **Original hypothesis**

Dietary inorganic nitrate ingestion, in addition to existing pharmacological therapy, reduces BP leading to reductions in LV mass and arterial stiffness.

### **Primary end points**

The primary end points are change in LV mass, determined using cardiovascular magnetic resonance imaging (CMR) (NITRATE-LVH arm) and a change in central systolic BP and PWV (NITRATE-CBP arm).

### **Secondary end points**

Secondary endpoints are change in ultrasound determined brachial artery flow-mediated dilation (FMD), change in plasma nitrate and nitrite levels and a change in peripheral BP.

### **Exploratory end points**

Exploratory end points for cardiac imaging include a change in aortic distensibility, LV systolic and diastolic function, LV volumes and ejection fraction, left atrial volumes and function and markers of myocardial fibrosis and oedema. We will assess changes in 12-lead ECG parameters of LVH. With regards to BP, we will assess for changes in BP variability, BP control rate and BP circadian pattern. We will also perform analysis of the salivary microbiome. Finally, we will assess changes in quality of life score (EQ-5D questionnaire) and biochemical measures e.g. urine albumin excretion, cholesterol fractions, B-natriuretic peptide (BNP) and troponin T.

### Inclusion criteria

A subject will be eligible for inclusion in this study only if all of the following criteria apply:

1. Patients will be enrolled following an informed consent.
2. Aged 18-80 years.
3. The study subjects will be hypertensive with evidence of difficulty treating to target BP (daytime ABPM 135-170 and/or 85-105 mm Hg) on 1 or more antihypertensive agent, with insufficient efficacy or intolerance of medications.
4. For the NITRATE-LVH arm, echocardiographic evidence of LVH (LV mass indexed to body surface area (BSA); males > 115 g/m<sup>2</sup>; females > 95 g/m<sup>2</sup>).
5. Patients will have been established on an antihypertensive treatment regime for at least 1 month by the time of participation in the study and will not require changes in pharmacological intervention for the duration of the trial.

### Exclusion criteria

Unless specified, a subject will not be eligible for inclusion in this study if any of the following criteria apply:

1. History of chronic viral hepatitis (including presence of hepatitis B surface antigen or hepatitis C antibody), or other chronic hepatic disorders.
2. History of increased liver function tests (ALT, AST) due to acute or chronic liver conditions, 3x above the upper limit of normal or bilirubin 1.5x above the upper limit of normal at screening.
3. Renal impairment with creatinine clearance (eGFR) of < 50 ml/min at screening.
4. Patients with diabetes mellitus, defined by previous history of diabetes or HbA1c > 6.5% (> 48 mmol/mol) at screening.
5. Subjects with LDLc, > 7.5 mmol/l and/or triglyceride level > 10 mmol/l.
6. History of heart failure defined as NYHA class II - IV or those with known LV dysfunction (LV ejection fraction < 40%) regardless of symptomatic status.
7. History of malignancy within the past 5 years, other than non-melanoma skin cancer.
8. Current life-threatening condition other than vascular disease (e.g. very severe chronic airways disease, HIV positive, life-threatening arrhythmias) that may prevent a subject from completing the study.

- 1
- 2
- 3 9. Use of an investigational device or investigational drug within 30 days or 5 half-lives
- 4 (whichever is longer) preceding the first dose of study medication.
- 5
- 6 10. Subjects who will commence or who are likely to commence regular treatment with non-
- 7 steroidal anti-inflammatory drugs (NSAIDs) (other than aspirin), from screening until study
- 8 completion.
- 9
- 10 11. Any non-stable dosing of ongoing medication regimens throughout the study trial.
- 11
- 12 12. Drug abuse within the past 6 months.
- 13
- 14 13. The subject has a three-month prior history of regular alcohol consumption exceeding an
- 15 average weekly intake of > 28 units (or an average daily intake of greater than 3 units) for
- 16 males, or an average weekly intake of > 21 units (or an average daily intake of greater than 2
- 17 units) for females. 1 unit is equivalent to a half-pint (284mL) of beer/lager; 25mL measure of
- 18 spirits or 125mL of wine.
- 19
- 20 14. Any other subject whom the Investigator deems unsuitable for the study (e.g. due to other
- 21 medical reasons, laboratory abnormalities, expected study medication noncompliance, or
- 22 subject's unwillingness to comply with all study-related study procedures).
- 23
- 24 15. Subjects with rheumatoid arthritis, connective tissue disorders and other conditions known
- 25 to be associated with chronic inflammation (e.g. Inflammatory Bowel Disease).
- 26
- 27 16. Subjects with any acute infection, or recent systemic (oral or IV) antibiotics within 1 month of
- 28 screening, or significant trauma (burns, fractures).
- 29
- 30 17. Subjects who have donated more than 500 mL of blood within 56 days prior to the study
- 31 medication administration.
- 32
- 33 18. Self-reported use of anti-microbial mouthwash or tongue scrapes.
- 34
- 35 19. Concomitant xanthine oxidase inhibitors (such as allopurinol).
- 36
- 37 20. Known history of significant claustrophobia, previous intolerance of CMR imaging or known
- 38 (or suspected) incompatible metallic implant.
- 39
- 40 21. Pregnancy.
- 41
- 42 22. Allergy to gadolinium-based contrast agents used for CMR.
- 43
- 44 23. Patients with known LVH caused by another established pathology diagnosed prior to or at
- 45 screening e.g. severe aortic stenosis, hypertrophic cardiomyopathy, amyloidosis and Fabry
- 46 disease.
- 47
- 48
- 49
- 50
- 51
- 52
- 53
- 54

55 Exceptions to the exclusion criteria:

- 56
- 57 • For criteria 18, patients can enter the trial if they discontinue the use of anti-microbial
- 58 mouthwash for the duration of the clinical trial.
- 59
- 60

- Criteria 20 and 22 do not apply to participants who will not have a CMR scan in the NITRATE-CBP arm.

### **Study design and intervention**

This is a prospective double-blind, placebo-controlled, clinical study. A total of 160 patients (male and female, age 18–80) with hypertension as per requirements indicated above will be recruited. Figure 1 shows a summary of the study scheme. Patients will be stratified at screening into 2 arms. Participants with LVH at screening echocardiography will enter the NITRATE-LVH arm (n=80) whilst those who do not have LVH but satisfy the other eligibility criteria will enter the NITRATE-CBP arm (n=80). LVH is defined by increased LV mass determined by acquiring a parasternal long axis image and subsequently measured for the interventricular septal wall thickness, end-diastolic LV cavity diameter and posterior LV wall thickness according to published guidelines.[28] LV mass is calculated as previously described and indexed to body surface area (BSA).[29]

All visits will take place at the William Harvey Heart Centre, Queen Mary University of London and Barts Heart Centre, St Bartholomew's Hospital, Barts Health NHS Trust. Patients will be randomised to receive 70 mL of a beetroot juice concentrate containing ~6 mmol nitrate or nitrate-depleted placebo juice concentrate (James White Drinks, UK) control. The volunteers will start taking their daily dose after completion of their baseline visit (visit 1) for 16 weeks. Patients will be advised to take their dose of juice at the same time each day, preferably in the morning with their breakfast. Patients will be provided with dietary advice in relation to the calorific content of interventions (both ~100kcal).

### **Randomisation and blinding process**

Patients will be block randomised on a 1:1 basis to receive either dietary nitrate or placebo, using a binary random number sequence (<http://www.random.org>). Treatment assignment for volunteers in the dietary nitrate and placebo groups will remain blinded until data lock and statistical analysis at the end of the study. If unblinding is required, the chief investigator for the study will be informed. A list of the unblinded treatments will be kept in a secure location at the Barts Cardiovascular Clinical Trials Unit (CVCTU). The unblinding procedure will be available at all times.

### **Patient involvement**

The NIHR Barts Biomedical Research Centre Patient and Public Advisory Group reviewed this protocol prior to submission to the Research Ethics Committee (REC). In addition, 20 previous Barts Health

1  
2  
3 NHS Trust patients were surveyed regarding aspects of trials involving dietary interventions, which  
4 informed this protocol.  
5  
6  
7

## 8 **Methods to be used**

### 9 **Blood, saliva and urine analysis**

10 In this study, venous blood will be taken using a 21-gauge butterfly needle at each visit. Blood samples  
11 will be centrifuged immediately and plasma separated. The plasma samples will be snap frozen in  
12 liquid nitrogen and stored at -80°C. These samples will be used for the purposes of making  
13 biochemical measurements and will be discarded once used. Similarly, saliva and urine will be  
14 collected at each visit. Saliva will be centrifuged, and a pellet generated. This pellet contains oral  
15 bacteria that have dislodged from the oral cavity. This pellet will be frozen for later analysis of oral  
16 bacteria by second-generation genome sequencing.  
17  
18  
19  
20  
21  
22  
23  
24

25 Nitrate and nitrite levels in saliva, blood and urine samples will be determined using ozone  
26 chemiluminescence as previously described.[30,31] In brief, total nitrate and nitrite concentration  
27 (termed 'NOx') will be determined by adding samples to 0.1mol/L vanadium (III) chloride in 1M  
28 hydrochloric acid refluxing at 95°C under nitrogen. Nitrite concentration will be determined by the  
29 addition of samples to 0.09 mol/L potassium iodide in glacial acetic acid under nitrogen at room  
30 temperature. Nitrate concentration will be calculated by the subtraction of [nitrite] from [NOx]. All  
31 measurements will be conducted by an individual blinded to the intervention.  
32  
33  
34  
35  
36  
37  
38

### 39 **Pulse wave analysis and pulse wave velocity**

40 Pulse wave analysis (PWA) and PWV are measures of arterial stiffness, which will be determined by a  
41 non-invasive Vicorder device (Skidmore Medical Limited, Bristol, UK). For PWA, the pulse wave will  
42 be recorded from the brachial cuff applied to the non-dominant arm. For PWV, the pulse wave will be  
43 simultaneously recorded from the carotid and femoral site using an oscillometric method. A small,  
44 inflatable neck pad will be placed directly over a carotid artery and secured around the neck by a  
45 Velcro tab and a cuff will also be placed around the patient's ipsilateral upper thigh. Both carotid and  
46 femoral cuffs will be simultaneously inflated automatically to 65 mm Hg and the corresponding  
47 oscillometric signal from each cuff digitally analysed to extract the pulse time delay. To estimate the  
48 aortic length, the distance between the sternal notch and the thigh cuff will be measured. From these  
49 measurements, PWV can be derived as  $PWV = \text{aortic distance} / \text{pulse time delay}$ . [32]  
50  
51  
52  
53  
54  
55  
56  
57  
58

### 59 **Flow-mediated dilation**

1  
2  
3 FMD will be used to non-invasively assess endothelial function, using vascular ultrasound to measure  
4 the increase in brachial artery diameter in response to increased flow[33] as previously described.[34]  
5 A high-resolution external vascular ultrasound Siemens/Acuson Sequoia C256 Colour Doppler with a  
6 7.0-MHz linear-array transducer supported by a stereotactic clamp will be used to assess the vessel  
7 diameter in the right arm. The vessel will be scanned in longitudinal section and the centre will be  
8 identified when the clearest views of the anterior and posterior artery walls have been obtained.  
9 Images will be magnified with a resolution box function and images of the brachial artery acquired  
10 continuously using semi-automated edge detection software (FMD Studio, Quipu s.r.l, Pisa, Italy) and  
11 analysed in real time. An automatic mathematical contour tracking operator locates the pulsed-wave  
12 Doppler of the brachial artery which will be used to measure the diameter and blood flow velocity  
13 continuously for 1 minute at baseline, then during 5 minutes of reduced blood flow (induced by  
14 inflation to 300 mm Hg of a pneumatic cuff placed on the right forearm site distal to the segment of  
15 artery being analysed), and finally for a further 5 minutes during reactive hyperaemia following cuff  
16 release. FMD is defined as the maximum percentage increase in vessel diameter during reactive  
17 hyperaemia. This procedure will be performed at visit 1 (baseline) and visit 3 (16 weeks). In some  
18 volunteers, following FMD, 0.4 mg of sublingual GTN (glyceryl trinitrate) will be administered at visit  
19 1 and visit 3 to determine whether changes in FMD responses following intervention might be due to  
20 changes in smooth muscle reactivity.  
21  
22  
23  
24  
25  
26  
27  
28  
29  
30  
31  
32  
33  
34

### 35 **Transthoracic echocardiography**

36 At visit 1 and 3, echocardiography is also performed to assess LV diastolic function. Images will be  
37 acquired for measures of LV diastolic function including left atrial end-diastolic volumes, pulmonary  
38 vein s/d ratio, mitral valve E/A ratio and E/e'. [28,35] Images will be acquired and analysed by an  
39 operator accredited by the British Society of Echocardiography.  
40  
41  
42  
43  
44

### 45 **CMR**

46 The most accurate and reproducible measurements of LVH are made by CMR.[36] At visits 1 and 3,  
47 CMR in the NITRATE-LVH arm and those that consent in the NITRATE-CBP arm will be used to assess  
48 LV mass, volumes and ejection fraction, T1 and T2 mapping, patterns of late gadolinium enhancement  
49 (LGE), aortic distensibility and PWV. Participants will have a peripheral venous cannula inserted and  
50 gadolinium injected at doses up to 0.2 mmol/kg.  
51  
52  
53  
54  
55

56 To allow a thorough assessment of cardiac function, the following imaging sequences will be  
57 undertaken:  
58  
59  
60

- Scout images, including black and white blood transverse slices of the thorax
- Long axis cines (4-chamber, 2-chamber, LVOT-1, LVOT-2, aortic valve short axis)
- Short axis cine stack
- T1 and T2 mapping
- LGE in the 4-chamber, 2-chamber, 3-chamber views and short axis stack
- Post contrast T1 mapping for extra-cellular volume (ECV) quantification
- Sagittal aortic views and aortic flow sequences for assessment of aortic distensibility and PWV.

Short axis images will be acquired using standard sequences i.e. 10 – 12 slices of 8mm thickness with 2mm gap to achieve whole LV coverage. This is undertaken with the patient in held expiration. Cine and LGE short axis stacks will be acquired using identical scanning geometry to assure correct image registration.

The following offline parameters will be measured:

- Presence of significant extra cardiac pathology
- Left ventricular ejection fraction, volumes and mass
- Distribution of LGE
- Analysis of pre and post contrast T1 mapping and T2 mapping. Short axis images will be segmented according to the AHA model as previously described[37]
- Aortic distensibility and pulse wave velocity.

For the analysis of study outcomes, each study will be anonymised by a third party. This will be separate from the study ID to avoid bias between pre- and post-treatment studies. Documentation of this anonymisation will be stored on a secure server at the Barts CVCTU, with unblinding for clinical reasons as necessary. The PI will be informed if this is necessary. Study analysis will occur in batches to prevent bias. For the assessment of LV volumes and mass, 2 readers will undertake assessment of inter and intra observer variation prior to analysis of blinded study images. Image analysis will be overseen and adjudicated by an experienced level 3 CMR reader (JCM).

#### **End of study definition**

The study will end after the final visit at week 16.

## **STATISTICAL ANALYSIS**

In this study, we intend to recruit 80 patients in each treatment arm with stratification of 80 patients overall recruited to NITRATE-LVH and 80 recruited to the NITRATE-CBP arms (total n=160). This sample size will empower our trial to test for the primary and all major secondary endpoints listed below.

We determined the sample size using G\*Power 3.0. Calculations were based on unpaired t-tests, a significance level of 0.05 (two-tailed) and the relevant standard deviations of the mean difference from published studies with reproducibility data: central systolic BP 1.7 mm Hg,[38] LV mass 9.9g,[39] CMR PWV 0.45 m/s,[40] Vicorder PWV 0.29 m/s.[40] For BP, we used measures of SD of systolic BP (as it has greater SD than diastolic BP) from the placebo limb of our previous intervention trial in hypertensive patients[13]: clinic systolic BP 8.4 mm Hg; ambulatory systolic BP 4.9 mm Hg; home systolic BP 3.9 mm Hg. International consensus documents on the optimal method for ultrasound FMD suggest using lab-specific data in sample size calculation and have suggested that 40 participants in a parallel study are sufficient to determine statistically important differences.[34] In a study of 4 week dietary nitrate intervention in hypertensive patients, SD of repeated measures of FMD in the placebo group was 0.6, whilst the mean difference between the groups was 1.0% [13], a SD of 1.1 .

### **Primary endpoints**

For the individual stratified sub-groups:

**NITRATE-LVH:** For the primary endpoint of LV mass regression we have a power of 95% for detecting a 9g LV mass change (~6% change for a mildly hypertrophied heart of 150 g). Previously published data showed a 10% reduction in LV mass in hypertensives after 3 months treatment with spironolactone.[41] Furthermore, dietary advice aimed at BP reduction in the TOMHS study demonstrated mean 9/9 mm Hg BP reduction and ~20g LV mass reduction from baseline ~200g (by echocardiography) at 3 months post intervention, representing ~10% reduction in LV mass.[42]

**NITRATE-CBP:** For non-CMR PWV we have a power of > 95% for detecting a 0.6 m/s absolute change (previously demonstrated following 4 weeks dietary nitrate in hypertensive patients[13]). For CMR determined PWV we have a power of > 95% for detecting a 0.6 m/s absolute change.[13] For our primary end point of reduction in central systolic BP we expect a scaled reduction in BP relative to observed decreases in brachial BP (8.7 mm Hg clinic brachial systolic BP)[13] though evidence suggests that low-dose intravenous nitrite infusions act to selectively lower central BP in preference to brachial



1  
2  
3 BP and therefore expected differences may be larger.[43] Nevertheless, using our conservative  
4 estimate based on two-thirds brachial BP effect, we have > 90% power to detect a 5.8 mm Hg  
5 difference in central systolic BP.  
6  
7

8  
9  
10 In post hoc analyses data will be combined from the 2 groups to assess the overall impact of inorganic  
11 nitrate versus placebo on the entire cohort for BP, nitrate and nitrite analysis. In addition, correlation  
12 analyses will be conducted using Pearson's correlation between measures of NOx, LV mass, BP and  
13 PWV.  
14  
15

### 16 17 18 **Secondary endpoints**

19  
20 a) Ultrasound FMD (%), > 90% power for detecting a 1.0% absolute change from a reduced FMD of  
21 ~5%.[13]  
22

#### 23 b) Brachial BP

24  
25 i) Clinic > 85% power to detect 7 mm Hg absolute change.[13]

26 ii) Ambulatory > 95% power to detect 7 mm Hg absolute change.[13]

27  
28 iii) Home > 85% power to detect 7 mm Hg absolute change.[13] The change observed in our 4  
29 week study was ~7 mm Hg[13] but with reduced measurement frequency, the possibility of  
30 increase measurement variability and therefore SD was arbitrarily doubled for this calculation.  
31  
32  
33

34  
35 Our sample size calculations assume a drop-out rate of 15% (non-compliance with dietary intervention  
36 or follow-up visits) based on our centres previous observations.  
37  
38

39  
40 Data will be analysed on an intention to treat basis. The data will be compared by multivariable  
41 regression analysis for each functional measure. The change from baseline in pre-specified primary,  
42 secondary and exploratory outcomes will be compared between groups by Student's t-test. We will  
43 adjust the results for multiple variables: sex, age, weight, body mass index and the initial differences  
44 between groups in LV mass.  
45  
46  
47  
48

### 49 50 **Ethical considerations**

51  
52 The study protocol and any subsequent amendments, along with materials provided to participants  
53 and advertising material, was submitted to London - City and East REC. Written approval from the REC  
54 was obtained along with final sponsorship and NHS Health Research Authority (HRA) approval.  
55  
56  
57

### 58 59 **Safety considerations**

60

1  
2  
3 The intervention is 70 mL of beetroot juice concentrate or nitrate-deplete beetroot juice (placebo;  
4 James White Drinks, UK). The nitrate is extracted using the same anion exchange technique to remove  
5 inorganic nitrate from the general drinking water supplies. There are no known serious side effects  
6 from these interventions and nitrate-free juice is classified as a foodstuff. In addition, several recent  
7 publications using the placebo juice are now available.[44–46] In the unlikely event of a serious  
8 adverse event (SAE) occurring directly as a result of the intervention, this would need to be reviewed  
9 by the chief investigator and the procedures followed as described below.  
10  
11  
12  
13  
14  
15  
16

### 17 **Safety reporting**

18 An AE will be documented in the participants' medical notes and the case report form (CRF) and  
19 followed up by the investigators. Serious adverse events (SAEs) will be reported to the sponsor and  
20 REC where in the opinion of the chief investigator the event was either 'related' (i.e., resulted from  
21 administration of research procedures) and 'unexpected' (i.e., the type of event is not an expected  
22 occurrence).  
23  
24  
25  
26  
27

28 SAEs considered to be 'related' and 'unexpected' will be recorded in the participants' notes, the  
29 sponsor SAE form and reported to the sponsor's joint research management office (JRMO) within 24  
30 hours of the research team being notified, and to the main REC within 15 days. The co-investigators  
31 will be authorised to sign SAE forms in the absence of the PI. The intervention for the participant will  
32 be unblinded in the reporting of an 'unexpected and related' SAE, performed by an individual  
33 independent of the study procedures and will allow the investigators to remain blinded. The  
34 unblinding of single cases will only be performed if necessary for the safety of a participant.  
35  
36  
37  
38  
39  
40  
41

## 42 **MONITORING**

### 43 **Trial Steering Committee (TSC)**

44  
45 The TSC is composed of three independent experts in the fields of: cardiac MRI, hypertension and  
46 clinical trials along with the investigators and the data monitor and two lay members. This committee  
47 met before participant recruitment and will meet annually to assess safety, feasibility or any other  
48 arising problems and their recommendations followed.  
49  
50  
51  
52  
53

### 54 **Data Safety and Monitoring Board (DSMB)**

55 The trial is classified as low-risk and does not require the formal setting up of a DSMB, however a  
56 DSMB has been established comprising a Clinical Trials Physician, Statistician and Cardiovascular  
57  
58  
59  
60

1  
2  
3 Physician. The DSMB met to review data after 20 patients in each study arm had completed their  
4 involvement, to advise about planned sample size and safety signals. The study will be subject to  
5 monitoring by the Sponsor, Queen Mary University of London, in accordance with their policies. Any  
6 monitoring findings will be relayed to the TSC by the Chief Investigator and acted in the best interest  
7 of patients, sponsor and funder.  
8  
9  
10  
11  
12

### 13 **Dissemination**

14  
15 The study will be performed in agreement with the Declaration of Helsinki and is approved by the  
16 Local REC (London – City and East; 10/H0703/98). Data collection will be completed by the third  
17 quarter of 2020. Primary and secondary analysis will start immediately after data collection is  
18 completed, with an aim to prepare publications for submission in 2021. The results of the trial will be  
19 published according to the CONSORT statement. Dissemination of results will be in peer-reviewed  
20 journal publications and presentations at national and international conferences. NITRATE-TOD is  
21 registered on Clinicaltrials.gov (NCT03088514).  
22  
23  
24  
25  
26  
27  
28

### 29 **Summary**

30 This is the first randomised-controlled trial assessing the use of prolonged dietary nitrate treatment  
31 in hypertension-induced target organ damage, specifically LVH and arterial stiffness. This study will  
32 determine the potential of prolonged dietary nitrate as adjunctive therapy in patients with sub  
33 optimally controlled hypertension on anti-hypertensive medication.  
34  
35  
36  
37  
38

39 **Contributors:** All authors listed above fulfil all three International Committee of Medical Journal  
40 Editors (ICMJE) guidelines for authorship, which are (1) substantial contributions to conception and  
41 design, acquisition of data or analysis, and interpretation of data; (2) drafting the article or revising it  
42 critically for important intellectual content; and (3) final approval of the version to be published. CWZL  
43 was responsible for coordinating the contribution of all authors to this paper. VK, AA, JM and CWZL  
44 developed the protocol. CWZL was responsible for drafting this paper. KR, AM, JCM, VK and AA were  
45 responsible for editing and providing guidance on the paper. All authors were responsible for critically  
46 revising the paper. All authors approved the final version of this paper for submission. This study is  
47 supported by the CVCTU, a branch of the Barts CTU UKCRC Reg No. 4.  
48  
49  
50  
51  
52  
53  
54

55 **Funding:** CWZL and this work are funded by a grant from Barts Charity.  
56  
57  
58  
59  
60

1  
2  
3 **Competing interests:** AA is a co-director of Heartbeet Ltd, which is a start-up company that seeks to  
4 identify commercial potential of dietary nitrate.  
5  
6  
7  
8  
9  
10  
11  
12  
13  
14  
15  
16  
17  
18  
19  
20  
21  
22  
23  
24  
25  
26  
27  
28  
29  
30  
31  
32  
33  
34  
35  
36  
37  
38  
39  
40  
41  
42  
43  
44  
45  
46  
47  
48  
49  
50  
51  
52  
53  
54  
55  
56  
57  
58  
59  
60

For peer review only

## REFERENCES

- 1 Lim SS, Vos T, Flaxman AD, *et al.* A comparative risk assessment of burden of disease and injury attributable to 67 risk factors and risk factor clusters in 21 regions, 1990–2010: a systematic analysis for the Global Burden of Disease Study 2010. *Lancet* 2012;**380**:2224–60. doi:10.1016/S0140-6736(12)61766-8
- 2 Forouzanfar MH, Liu P, Roth GA, *et al.* Global Burden of Hypertension and Systolic Blood Pressure of at Least 110 to 115 mm Hg, 1990–2015. *JAMA* 2017;**317**:165. doi:10.1001/jama.2016.19043
- 3 Vos T, Alemu Abajobir A, Hassen Abate K, *et al.* Global, regional, and national incidence, prevalence, and years lived with disability for 328 diseases and injuries for 195 countries, 1990–2016: a systematic analysis for the Global Burden of Disease Study 2016. *Lancet* 2017;**390**:1211–59. <https://vizhub>. (accessed 9 Apr 2019).
- 4 WHO WHO. Global status report on noncommunicable diseases 2014. Geneva: 2014. [http://apps.who.int/iris/bitstream/handle/10665/148114/9789241564854\\_eng.pdf;jsessionid=FD9481BC2C213324152C9CDB8D3740DF?sequence=1](http://apps.who.int/iris/bitstream/handle/10665/148114/9789241564854_eng.pdf;jsessionid=FD9481BC2C213324152C9CDB8D3740DF?sequence=1)
- 5 Appel LJ, Moore TJ, Obarzanek E, *et al.* A Clinical Trial of the Effects of Dietary Patterns on Blood Pressure. *N Engl J Med* 1997;**336**:1117–24. doi:10.1056/NEJM199704173361601
- 6 Joshipura KJ, Hu FB, Manson JE, *et al.* The Effect of Fruit and Vegetable Intake on Risk for Coronary Heart Disease. *Ann Intern Med* 2001;**134**:1106. doi:10.7326/0003-4819-134-12-200106190-00010
- 7 Lundberg JO, Feelisch M, Björne H, *et al.* Cardioprotective effects of vegetables: Is nitrate the answer? *Nitric Oxide* 2006;**15**:359–62. doi:10.1016/j.niox.2006.01.013
- 8 Ghosh SM, Kapil V, Fuentes-Calvo I, *et al.* Enhanced Vasodilator Activity of Nitrite in Hypertension Novelty and Significance. *Hypertension* 2013;**61**.
- 9 Kapil V, Milsom AB, Okorie M, *et al.* Inorganic Nitrate Supplementation Lowers Blood Pressure in Humans. *Hypertension* 2010;**56**:274–81. doi:10.1161/HYPERTENSIONAHA.110.153536
- 10 Webb AJ, Patel N, Loukogeorgakis S, *et al.* Acute blood pressure lowering, vasoprotective, and antiplatelet properties of dietary nitrate via bioconversion to nitrite. *Hypertens (Dallas, Tex 1979)* 2008;**51**:784–90. doi:10.1161/HYPERTENSIONAHA.107.103523
- 11 Tannenbaum SR, Weisman M, Fett D. The effect of nitrate intake on nitrite formation in human saliva. *Food Cosmet Toxicol* 1976;**14**:549–52. <http://www.ncbi.nlm.nih.gov/pubmed/1017770> (accessed 20 Jun 2018).
- 12 Duncan C, Dougall H, Johnston P, *et al.* Chemical generation of nitric oxide in the mouth from the enterosalivary circulation of dietary nitrate. *Nat Med* 1995;**1**:546–51. <http://www.ncbi.nlm.nih.gov/pubmed/7585121> (accessed 20 Jun 2018).
- 13 Kapil V, Khambata RS, Robertson A, *et al.* Dietary nitrate provides sustained blood pressure lowering in hypertensive patients: A randomized, phase 2, double-blind, placebo-controlled study. *Hypertension* 2015;**65**:320–7. doi:10.1161/HYPERTENSIONAHA.114.04675
- 14 Greenwald S. Ageing of the conduit arteries. *J Pathol* 2007;**211**:157–72. doi:10.1002/path.2101
- 15 Laurent S, Cockcroft J, Van Bortel L, *et al.* Expert consensus document on arterial stiffness: methodological issues and clinical applications. *Eur Heart J* 2006;**27**:2588–605. doi:10.1093/eurheartj/ehl254
- 16 Ben-Shlomo Y, Spears M, Boustred C, *et al.* Aortic Pulse Wave Velocity Improves Cardiovascular Event Prediction. *J Am Coll Cardiol* 2014;**63**:636–46. doi:10.1016/j.jacc.2013.09.063
- 17 Boutouyrie P, Laurent S, Briet M. Importance of arterial stiffness as cardiovascular risk factor for future development of new type of drugs. *Fundam Clin Pharmacol* 2008;**22**:241–6. doi:10.1111/j.1472-8206.2008.00584.x

- 1  
2  
3 18 Gradman AH, Alfayoumi F. From Left Ventricular Hypertrophy to Congestive Heart Failure:  
4 Management of Hypertensive Heart Disease. *Prog Cardiovasc Dis* 2006;**48**:326–41.  
5 doi:10.1016/j.pcad.2006.02.001  
6  
7 19 Nadruz W. Myocardial remodeling in hypertension. *J Hum Hypertens* 2015;**29**:1–6.  
8 doi:10.1038/jhh.2014.36  
9  
10 20 Levy D, Garrison RJ, Savage DD, *et al.* Prognostic Implications of Echocardiographically  
11 Determined Left Ventricular Mass in the Framingham Heart Study. *N Engl J Med*  
12 1990;**322**:1561–6. doi:10.1056/NEJM199005313222203  
13  
14 21 Kannel WB. Left ventricular hypertrophy as a risk factor in arterial hypertension. *Eur Heart J*  
15 1992;**13**:82–8. doi:10.1093/eurheartj/13.suppl\_D.82  
16  
17 22 Ruilope LM, Schmieder RE. Left Ventricular Hypertrophy and Clinical Outcomes in  
18 Hypertensive Patients. *Am J Hypertens* 2008;**21**:500–8. doi:10.1038/ajh.2008.16  
19  
20 23 Mathew J, Sleight P, Lonn E, *et al.* Reduction of Cardiovascular Risk by Regression of  
21 Electrocardiographic Markers of Left Ventricular Hypertrophy by the Angiotensin-Converting  
22 Enzyme Inhibitor Ramipril. *Circulation* 2001;**104**:1615–21. doi:10.1161/hc3901.096700  
23  
24 24 Dahlöf B, Devereux RB, Kjeldsen SE, *et al.* Cardiovascular morbidity and mortality in the  
25 Losartan Intervention For Endpoint reduction in hypertension study (LIFE): a randomised trial  
26 against atenolol. *Lancet* 2002;**359**:995–1003. doi:10.1016/S0140-6736(02)08089-3  
27  
28 25 Ruiz-Hurtado G, Delgado C. Nitric oxide pathway in hypertrophied heart: new therapeutic  
29 uses of nitric oxide donors. *J Hypertens* 2010;**28 Suppl 1**:S56–61.  
30 doi:10.1097/01.hjh.0000388496.66330.b8  
31  
32 26 Carlström M, Persson AEG, Larsson E, *et al.* Dietary nitrate attenuates oxidative stress,  
33 prevents cardiac and renal injuries, and reduces blood pressure in salt-induced hypertension.  
34 *Cardiovasc Res* 2011;**89**:574–85. doi:10.1093/cvr/cvq366  
35  
36 27 Bahra M, Kapil V, Pearl V, *et al.* Inorganic nitrate ingestion improves vascular compliance but  
37 does not alter flow-mediated dilatation in healthy volunteers. *Nitric oxide Biol Chem*  
38 2012;**26**:197–202. doi:10.1016/j.niox.2012.01.004  
39  
40 28 Lang RM, Badano LP, Mor-Avi V, *et al.* Recommendations for cardiac chamber quantification  
41 by echocardiography in adults: An update from the American society of echocardiography  
42 and the European association of cardiovascular imaging. *Eur Heart J Cardiovasc Imaging*  
43 Published Online First: 2015. doi:10.1093/ehjci/jev014  
44  
45 29 Devereux RB, Alonso DR, Lutas EM, *et al.* Echocardiographic assessment of left ventricular  
46 hypertrophy: comparison to necropsy findings. *Am J Cardiol* 1986;**57**:450–  
47 8. <http://www.ncbi.nlm.nih.gov/pubmed/2936235> (accessed 21 Jun 2018).  
48  
49 30 Ignarro LJ, Fukuto JM, Griscavage JM, *et al.* Oxidation of nitric oxide in aqueous solution to  
50 nitrite but not nitrate: comparison with enzymatically formed nitric oxide from L-arginine.  
51 *Proc Natl Acad Sci U S A* 1993;**90**:8103–7. <http://www.ncbi.nlm.nih.gov/pubmed/7690141>  
52 (accessed 21 Jun 2018).  
53  
54 31 Bush PA, Gonzalez NE, Griscavage JM, *et al.* Nitric oxide synthase from cerebellum catalyzes  
55 the formation of equimolar quantities of nitric oxide and citrulline from L-arginine. *Biochem*  
56 *Biophys Res Commun* 1992;**185**:960–6. doi:10.1016/0006-291X(92)91720-B  
57  
58 32 Hickson SS, Butlin M, Broad J, *et al.* Validity and repeatability of the Vicorder apparatus: a  
59 comparison with the SphygmoCor device. *Hypertens Res* 2009;**32**:1079–85.  
60 doi:10.1038/hr.2009.154  
61  
62 33 Celermajer DS, Sorensen KE, Gooch VM, *et al.* Non-invasive detection of endothelial  
63 dysfunction in children and adults at risk of atherosclerosis. *Lancet* 1992;**340**:1111–5.  
64 doi:10.1016/0140-6736(92)93147-F  
65  
66 34 Corretti MC, Anderson TJ, Benjamin EJ, *et al.* Guidelines for the ultrasound assessment of  
67 endothelial-dependent flow-mediated vasodilation of the brachial artery: A report of the  
68 International Brachial Artery Reactivity Task Force. *J Am Coll Cardiol* 2002;**39**:257–65.  
69 doi:10.1016/S0735-1097(01)01746-6  
70

- 1  
2  
3 35 Wharton G, Steeds R, Allen J, *et al.* A minimum dataset for a standard adult transthoracic  
4 echocardiogram: a guideline protocol from the British Society of Echocardiography. Published  
5 Online First: 2015. doi:10.1530/ERP-14-0079  
6  
7 36 Bottini P, Carr A, Prisant L, *et al.* Magnetic resonance imaging compared to echocardiography  
8 to assess left ventricular mass in the hypertensive patient. *Am J Hypertens* 1995;**8**:221–8.  
9 doi:10.1016/0895-7061(94)00178-E  
10  
11 37 Treibel TA, Kozor R, Schofield R, *et al.* Reverse Myocardial Remodeling Following Valve  
12 Replacement in Patients With Aortic Stenosis. *J Am Coll Cardiol* 2018;**71**:860–71.  
13 doi:10.1016/j.jacc.2017.12.035  
14  
15 38 Siebenhofer A, Kemp C, Sutton A, *et al.* The reproducibility of central aortic blood pressure  
16 measurements in healthy subjects using applanation tonometry and sphygmocardiography. *J*  
17 *Hum Hypertens* 1999;**13**:625–9. <http://www.ncbi.nlm.nih.gov/pubmed/10482972> (accessed  
18 23 May 2017).  
19  
20 39 Hudsmith LE, Petersen SE, Francis JM, *et al.* Normal human left and right ventricular and left  
21 atrial dimensions using steady state free precession magnetic resonance imaging. *J*  
22 *Cardiovasc Magn Reson* 2005;**7**:775–82.  
23  
24 40 Grotenhuis HB, Westenberg JJM, Steendijk P, *et al.* Validation and reproducibility of aortic  
25 pulse wave velocity as assessed with velocity-encoded MRI. *J Magn Reson Imaging*  
26 2009;**30**:521–6. doi:10.1002/jmri.21886  
27  
28 41 Gaddam K, Corros C, Pimenta E, *et al.* Rapid Reversal of Left Ventricular Hypertrophy and  
29 Intracardiac Volume Overload in Patients With Resistant Hypertension and  
30 Hyperaldosteronism: A Prospective Clinical Study. *Hypertension* 2010;**55**:1137–42.  
31 doi:10.1161/HYPERTENSIONAHA.109.141531  
32  
33 42 Liebson PR, Grandits GA, Dianzumba S, *et al.* Comparison of five antihypertensive  
34 monotherapies and placebo for change in left ventricular mass in patients receiving  
35 nutritional-hygienic therapy in the Treatment of Mild Hypertension Study (TOMHS).  
36 *Circulation* 1995;**91**:698–706. <http://www.ncbi.nlm.nih.gov/pubmed/7828296> (accessed 21  
37 Jun 2018).  
38  
39 43 Omar SA, Fok H, Tilgner KD, *et al.* Paradoxical Normoxia-Dependent Selective Actions of  
40 Inorganic Nitrite in Human Muscular Conduit Arteries and Related Selective Actions on  
41 Central Blood Pressures. *Circulation*  
42 2015;**131**. <http://circ.ahajournals.org/content/131/4/381.long> (accessed 23 May 2017).  
43  
44 44 Gilchrist M, Winyard PG, Fulford J, *et al.* Dietary nitrate supplementation improves reaction  
45 time in type 2 diabetes: Development and application of a novel nitrate-depleted beetroot  
46 juice placebo. *Nitric Oxide* 2014;**40**:67–74. doi:10.1016/j.niox.2014.05.003  
47  
48 45 Gilchrist M, Winyard PG, Aizawa K, *et al.* Effect of dietary nitrate on blood pressure,  
49 endothelial function, and insulin sensitivity in type 2 diabetes. *Free Radic Biol Med*  
50 2013;**60**:89–97. doi:10.1016/j.freeradbiomed.2013.01.024  
51  
52 46 Lansley KE, Winyard PG, Bailey SJ, *et al.* Acute dietary nitrate supplementation improves  
53 cycling time trial performance. *Med Sci Sports Exerc* 2011;**43**:1125–31.  
54 doi:10.1249/MSS.0b013e31821597b4  
55  
56  
57  
58  
59  
60

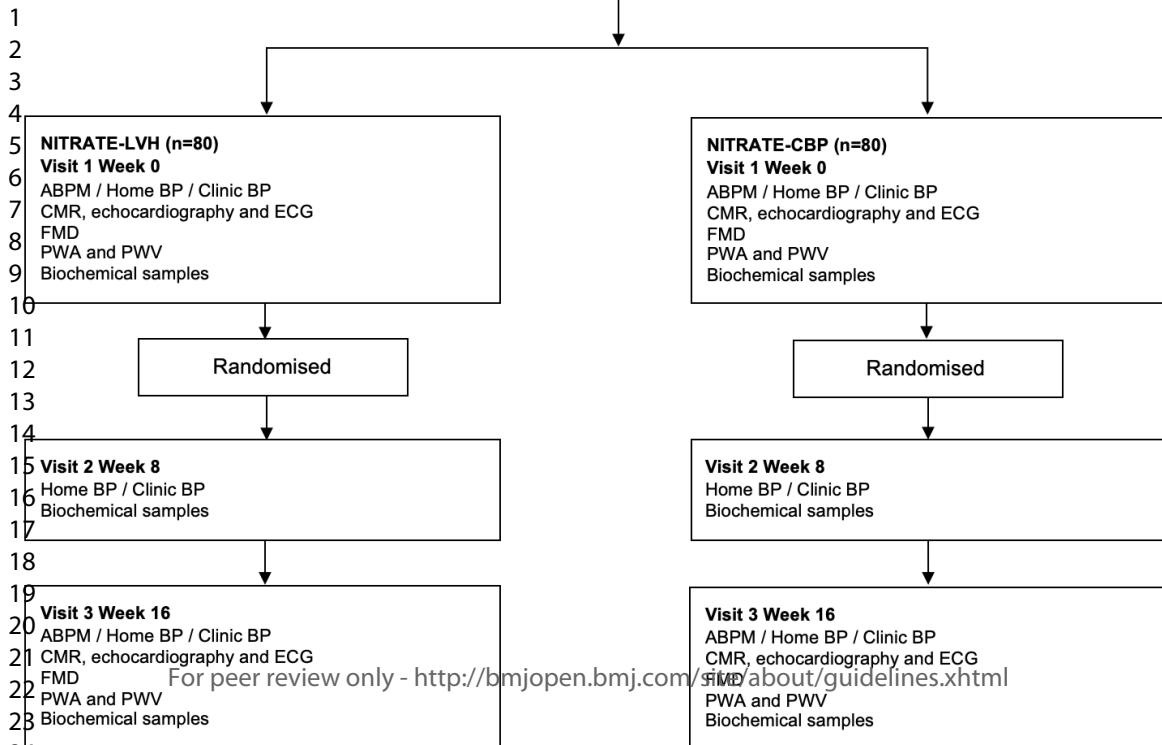



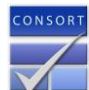

## CONSORT 2010 checklist of information to include when reporting a randomised trial\*

| Section/Topic                    | Item No | Checklist item                                                                                                                                                                              | Reported on page No |
|----------------------------------|---------|---------------------------------------------------------------------------------------------------------------------------------------------------------------------------------------------|---------------------|
| <b>Title and abstract</b>        |         |                                                                                                                                                                                             |                     |
|                                  | 1a      | Identification as a randomised trial in the title                                                                                                                                           | 1                   |
|                                  | 1b      | Structured summary of trial design, methods, results, and conclusions (for specific guidance see CONSORT for abstracts)                                                                     | 2                   |
| <b>Introduction</b>              |         |                                                                                                                                                                                             |                     |
| Background and objectives        | 2a      | Scientific background and explanation of rationale                                                                                                                                          | 4                   |
|                                  | 2b      | Specific objectives or hypotheses                                                                                                                                                           | 6                   |
| <b>Methods</b>                   |         |                                                                                                                                                                                             |                     |
| Trial design                     | 3a      | Description of trial design (such as parallel, factorial) including allocation ratio                                                                                                        | 9                   |
|                                  | 3b      | Important changes to methods after trial commencement (such as eligibility criteria), with reasons                                                                                          | 7                   |
| Participants                     | 4a      | Eligibility criteria for participants                                                                                                                                                       | 7                   |
|                                  | 4b      | Settings and locations where the data were collected                                                                                                                                        | 9                   |
| Interventions                    | 5       | The interventions for each group with sufficient details to allow replication, including how and when they were actually administered                                                       | 9                   |
| Outcomes                         | 6a      | Completely defined pre-specified primary and secondary outcome measures, including how and when they were assessed                                                                          | 6                   |
|                                  | 6b      | Any changes to trial outcomes after the trial commenced, with reasons                                                                                                                       | NA                  |
| Sample size                      | 7a      | How sample size was determined                                                                                                                                                              | 13                  |
|                                  | 7b      | When applicable, explanation of any interim analyses and stopping guidelines                                                                                                                | NA                  |
| <b>Randomisation:</b>            |         |                                                                                                                                                                                             |                     |
| Sequence generation              | 8a      | Method used to generate the random allocation sequence                                                                                                                                      | 9                   |
|                                  | 8b      | Type of randomisation; details of any restriction (such as blocking and block size)                                                                                                         | 9                   |
| Allocation concealment mechanism | 9       | Mechanism used to implement the random allocation sequence (such as sequentially numbered containers), describing any steps taken to conceal the sequence until interventions were assigned | 9                   |
| Implementation                   | 10      | Who generated the random allocation sequence, who enrolled participants, and who assigned participants to interventions                                                                     | 9                   |
| Blinding                         | 11a     | If done, who was blinded after assignment to interventions (for example, participants, care providers, those                                                                                | 9                   |

|                                                      |     |                                                                                                                                                   |    |
|------------------------------------------------------|-----|---------------------------------------------------------------------------------------------------------------------------------------------------|----|
|                                                      |     | assessing outcomes) and how                                                                                                                       |    |
|                                                      | 11b | If relevant, description of the similarity of interventions                                                                                       | 9  |
| Statistical methods                                  | 12a | Statistical methods used to compare groups for primary and secondary outcomes                                                                     | 14 |
|                                                      | 12b | Methods for additional analyses, such as subgroup analyses and adjusted analyses                                                                  | 14 |
| <b>Results</b>                                       |     |                                                                                                                                                   |    |
| Participant flow (a diagram is strongly recommended) | 13a | For each group, the numbers of participants who were randomly assigned, received intended treatment, and were analysed for the primary outcome    | NA |
|                                                      | 13b | For each group, losses and exclusions after randomisation, together with reasons                                                                  | NA |
| Recruitment                                          | 14a | Dates defining the periods of recruitment and follow-up                                                                                           | NA |
|                                                      | 14b | Why the trial ended or was stopped                                                                                                                | NA |
| Baseline data                                        | 15  | A table showing baseline demographic and clinical characteristics for each group                                                                  | NA |
| Numbers analysed                                     | 16  | For each group, number of participants (denominator) included in each analysis and whether the analysis was by original assigned groups           | NA |
| Outcomes and estimation                              | 17a | For each primary and secondary outcome, results for each group, and the estimated effect size and its precision (such as 95% confidence interval) | NA |
|                                                      | 17b | For binary outcomes, presentation of both absolute and relative effect sizes is recommended                                                       | NA |
| Ancillary analyses                                   | 18  | Results of any other analyses performed, including subgroup analyses and adjusted analyses, distinguishing pre-specified from exploratory         | NA |
| Harms                                                | 19  | All important harms or unintended effects in each group (for specific guidance see CONSORT for harms)                                             | NA |
| <b>Discussion</b>                                    |     |                                                                                                                                                   |    |
| Limitations                                          | 20  | Trial limitations, addressing sources of potential bias, imprecision, and, if relevant, multiplicity of analyses                                  | NA |
| Generalisability                                     | 21  | Generalisability (external validity, applicability) of the trial findings                                                                         | NA |
| Interpretation                                       | 22  | Interpretation consistent with results, balancing benefits and harms, and considering other relevant evidence                                     | NA |
| <b>Other information</b>                             |     |                                                                                                                                                   |    |
| Registration                                         | 23  | Registration number and name of trial registry                                                                                                    | 16 |
| Protocol                                             | 24  | Where the full trial protocol can be accessed, if available                                                                                       | 16 |
| Funding                                              | 25  | Sources of funding and other support (such as supply of drugs), role of funders                                                                   | 16 |

\*We strongly recommend reading this statement in conjunction with the CONSORT 2010 Explanation and Elaboration for important clarifications on all the items. If relevant, we also recommend reading CONSORT extensions for cluster randomised trials, non-inferiority and equivalence trials, non-pharmacological treatments, herbal interventions, and pragmatic trials. Additional extensions are forthcoming: for those and for up to date references relevant to this checklist, see [www.consort-statement.org](http://www.consort-statement.org).

# BMJ Open

## RANDOMISED, DOUBLE-BLIND, PLACEBO-CONTROLLED CLINICAL TRIAL INVESTIGATING THE EFFECTS OF INORGANIC NITRATE IN HYPERTENSION-INDUCED TARGET ORGAN DAMAGE: PROTOCOL OF THE NITRATE-TOD STUDY IN THE UK

|                                 |                                                                                                                                                                                                                                                                                                                                                                                                                                                                                                                                                                                                                                                                                                                                                                                                                                                                                                                                                                                                                                                                                                                                                                                                                                                                                                                                                                                                                                                                                                                                                                                                                                                                                                                                                                                                                                       |
|---------------------------------|---------------------------------------------------------------------------------------------------------------------------------------------------------------------------------------------------------------------------------------------------------------------------------------------------------------------------------------------------------------------------------------------------------------------------------------------------------------------------------------------------------------------------------------------------------------------------------------------------------------------------------------------------------------------------------------------------------------------------------------------------------------------------------------------------------------------------------------------------------------------------------------------------------------------------------------------------------------------------------------------------------------------------------------------------------------------------------------------------------------------------------------------------------------------------------------------------------------------------------------------------------------------------------------------------------------------------------------------------------------------------------------------------------------------------------------------------------------------------------------------------------------------------------------------------------------------------------------------------------------------------------------------------------------------------------------------------------------------------------------------------------------------------------------------------------------------------------------|
| Journal:                        | <i>BMJ Open</i>                                                                                                                                                                                                                                                                                                                                                                                                                                                                                                                                                                                                                                                                                                                                                                                                                                                                                                                                                                                                                                                                                                                                                                                                                                                                                                                                                                                                                                                                                                                                                                                                                                                                                                                                                                                                                       |
| Manuscript ID                   | bmjopen-2019-034399.R1                                                                                                                                                                                                                                                                                                                                                                                                                                                                                                                                                                                                                                                                                                                                                                                                                                                                                                                                                                                                                                                                                                                                                                                                                                                                                                                                                                                                                                                                                                                                                                                                                                                                                                                                                                                                                |
| Article Type:                   | Protocol                                                                                                                                                                                                                                                                                                                                                                                                                                                                                                                                                                                                                                                                                                                                                                                                                                                                                                                                                                                                                                                                                                                                                                                                                                                                                                                                                                                                                                                                                                                                                                                                                                                                                                                                                                                                                              |
| Date Submitted by the Author:   | 18-Nov-2019                                                                                                                                                                                                                                                                                                                                                                                                                                                                                                                                                                                                                                                                                                                                                                                                                                                                                                                                                                                                                                                                                                                                                                                                                                                                                                                                                                                                                                                                                                                                                                                                                                                                                                                                                                                                                           |
| Complete List of Authors:       | Lau, Clement; William Harvey Research Institute, Barts NIHR Cardiovascular Biomedical Research Unit, Centre of Clinical Pharmacology, Queen Mary University of London; Barts Health NHS Trust<br>Hamers, Alexander Jozua Pedro ; William Harvey Research Institute, Barts NIHR Cardiovascular Biomedical Research Unit, Centre of Clinical Pharmacology, Queen Mary University of London<br>Rathod, Krishnaraj; William Harvey Research Institute, Barts NIHR Cardiovascular Biomedical Research Unit, Centre of Clinical Pharmacology, Queen Mary University of London; Barts Health NHS Trust<br>Shabbir, Asad; William Harvey Research Institute, Barts NIHR Cardiovascular Biomedical Research Unit, Centre of Clinical Pharmacology, Queen Mary University of London<br>Cooper, Jackie; William Harvey Research Institute, Barts NIHR Cardiovascular Biomedical Research Unit, Centre of Clinical Pharmacology, Queen Mary University of London<br>Primus, Christopher; William Harvey Research Institute, Barts NIHR Cardiovascular Biomedical Research Unit, Centre of Clinical Pharmacology, Queen Mary University of London; Barts Health NHS Trust<br>Davies, Ceri; William Harvey Research Institute; Barts Health NHS Trust<br>Mathur, Anthony; William Harvey Research Institute; Barts Health NHS Trust<br>Moon, James; UCL Institute of Cardiovascular Science, University College London, Gower Street, London; Barts Health NHS Trust<br>Kapil, Vikas; William Harvey Research Institute, Barts NIHR Cardiovascular Biomedical Research Unit, Centre of Clinical Pharmacology, Queen Mary University of London; Barts Health NHS Trust<br>Ahluwalia, Amrita; William Harvey Research Institute, Barts NIHR Cardiovascular Biomedical Research Unit, Centre of Clinical Pharmacology, Queen Mary University of London |
| <b>Primary Subject Heading</b>: | Cardiovascular medicine                                                                                                                                                                                                                                                                                                                                                                                                                                                                                                                                                                                                                                                                                                                                                                                                                                                                                                                                                                                                                                                                                                                                                                                                                                                                                                                                                                                                                                                                                                                                                                                                                                                                                                                                                                                                               |
| Secondary Subject Heading:      | Pharmacology and therapeutics                                                                                                                                                                                                                                                                                                                                                                                                                                                                                                                                                                                                                                                                                                                                                                                                                                                                                                                                                                                                                                                                                                                                                                                                                                                                                                                                                                                                                                                                                                                                                                                                                                                                                                                                                                                                         |
| Keywords:                       | Hypertension < RADIOLOGY, Cardiovascular imaging < RADIOLOGY & IMAGING, CLINICAL PHARMACOLOGY, Clinical trials < THERAPEUTICS                                                                                                                                                                                                                                                                                                                                                                                                                                                                                                                                                                                                                                                                                                                                                                                                                                                                                                                                                                                                                                                                                                                                                                                                                                                                                                                                                                                                                                                                                                                                                                                                                                                                                                         |

1  
2  
3  
4  
5  
6  
7  
8  
9  
10  
11  
12  
13  
14  
15  
16  
17  
18  
19  
20  
21  
22  
23  
24  
25  
26  
27  
28  
29  
30  
31  
32  
33  
34  
35  
36  
37  
38  
39  
40  
41  
42  
43  
44  
45  
46  
47  
48  
49  
50  
51  
52  
53  
54  
55  
56  
57  
58  
59  
60

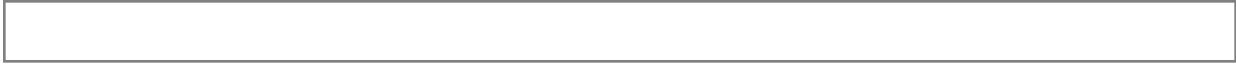

SCHOLARONE™  
Manuscripts

1  
2  
3 **RANDOMISED, DOUBLE-BLIND, PLACEBO-CONTROLLED CLINICAL TRIAL INVESTIGATING THE**  
4 **EFFECTS OF INORGANIC NITRATE IN HYPERTENSION-INDUCED TARGET ORGAN DAMAGE:**  
5 **PROTOCOL OF THE NITRATE-TOD STUDY IN THE UK**  
6  
7  
8  
9

10 Lau CWZ<sup>1</sup>, Hamers AJP<sup>1</sup>, Rathod KS<sup>1</sup>, Shabbir A<sup>1</sup>, Cooper J<sup>1</sup>, Primus C<sup>1</sup>, Davies C<sup>1</sup>, Mathur A<sup>1</sup>, Moon JC<sup>2</sup>,  
11 Kapil V<sup>1,3</sup>, Ahluwalia A<sup>1</sup>  
12  
13  
14

15 <sup>1</sup>William Harvey Research Institute, Barts and the London School of Medicine and Dentistry, Queen  
16 Mary University of London, London, United Kingdom.

17 <sup>2</sup>Institute of Cardiovascular Science, University College London, London, United Kingdom; Barts Heart  
18 Centre, West Smithfield, London, United Kingdom.  
19

20 <sup>3</sup>Barts BP Centre of Excellence, Barts Heart Centre, Barts Health NHS Trust, London, United Kingdom.  
21  
22  
23  
24

25 **Corresponding author:**

26 Professor Amrita Ahluwalia

27 William Harvey Research Institute

28 Barts and The London School of Medicine and Dentistry

29 Queen Mary University of London

30 Charterhouse Square

31 London, EC1M 6BQ

32 United Kingdom

33 Tel: +44 207 882 8377

34 Email: [a.ahluwalia@qmul.ac.uk](mailto:a.ahluwalia@qmul.ac.uk)  
35  
36  
37  
38  
39  
40  
41  
42  
43  
44  
45  
46  
47  
48  
49  
50  
51  
52  
53  
54  
55  
56  
57  
58  
59  
60

Word count: 4,692

## **ABSTRACT**

### **Introduction**

Arterial stiffness and left ventricular hypertrophy (LVH) are key markers of hypertensive target organ damage (TOD) associated with increased cardiovascular morbidity and mortality. We have previously shown that dietary inorganic nitrate supplementation lowers blood pressure (BP) in hypertension, however, whether this approach might also improve markers of hypertensive TOD is unknown. In this study, we will investigate whether daily dietary inorganic nitrate administration reduces left ventricular (LV) mass and improves measures of arterial stiffness.

### **Methods and Design**

NITRATE-TOD is a double-blind, randomised, single-centre, placebo-controlled phase II trial aiming to enrol 160 patients with suboptimal BP control on 1 or more anti-hypertensives. Patients will be randomised to receive 4-month once daily dose of either nitrate-rich beetroot juice or nitrate-deplete beetroot juice (placebo). The primary outcomes are reduction in LV mass and reduction in pulse wave velocity (PWV) and central blood pressure (CBP).

The study has a power of 95% for detecting a 9g LV mass change by cardiovascular magnetic resonance (CMR) imaging (~6% change for a mildly hypertrophied heart of 150g). For PWV we have a power of > 95% for detecting a 0.6 m/s absolute change. For central systolic BP, we have a > 90% power to detect a 5.8 mm Hg difference in central systolic BP.

Secondary end-points include change in ultrasound flow mediated dilatation (FMD), change in plasma nitrate and nitrite concentration and change in BP.

### **Ethics and Dissemination**

The study was approved by the London – City and East Research Ethics Committee (10/H0703/98). Trial results will be published according to the CONSORT statement and will be presented at conferences and reported in peer-reviewed journals.

ClinicalTrials.gov identifier: NCT03088514

### **Strengths and limitations of this study**

- This is a randomised, placebo-controlled double-blind clinical trial assessing the potential of dietary nitrate in reducing both cardiac and vascular damage due to persistently elevated blood pressure.
- Dietary nitrate is a simple, easy to use and safe intervention that may be more acceptable to patients on long term medication for their blood pressure.
- This is a single-centre phase II study; therefore, the applicability to other centres is uncertain.

For peer review only

## INTRODUCTION

Hypertension is the leading risk factor for cardiovascular diseases (CVD) worldwide.[1,2] In 2016, an estimated 17.9 million people died from CVDs, which represents 31% of all global deaths.[3] Approximately half of these deaths were caused by complications from hypertension.[4] Hence, novel and cost-effective therapeutic strategies continue to be sought. In this regard there has been a major emphasis to increase vegetable intake since increased consumption of a vegetable-rich diet particularly green leafy vegetables confers protection against CVD, including the lowering of BP[5,6]. One particular constituent of such vegetables that has been proposed to underlie the beneficial effects of this food group is inorganic nitrate; through bioconversion to nitrite, and then nitrite to nitric oxide (NO)[7] in the body. Importantly, provision of inorganic nitrate to hypertensive patients causes a rise in plasma nitrate and is associated with a decrease in BP.[8,9]

Dietary inorganic nitrate once ingested rapidly enters the circulation[8–10] with a proportion of this nitrate being extracted and then secreted and concentrated in the saliva.[11] Bacteria residing in the oral cavity convert this nitrate to nitrite which is then swallowed;[12] appearing soon after within the circulation. We have recently shown that daily supplementation with dietary nitrate (providing approximately 6.4 mmol nitrate daily) for 4 weeks was associated with robust, sustained and clinically meaningful reductions in BP (measured by clinic, ambulatory and home methods) of ~8/4 mm Hg.[13] However, persistent hypertension leads to both vascular and cardiac remodelling and whether inorganic nitrate-induced reductions in BP might be associated with improvements in either of these in the long term is unknown. Experimentally in patients one can assess this potential through the measurement of arterial stiffness and LV mass respectively, with increases of either conferring increased CV risk. Arterial stiffness (and its inverse measure, distensibility) refers to the decreased elasticity that develops in arteries as a consequence of vascular remodelling resulting from alterations of the fibrous components of the extracellular matrix (including elastin and collagen).[14] Importantly, increased arterial stiffness, as measured using carotid-femoral PWV,[15] is a strong predictor of CV events,[16] and there have been suggestions that drug development targeting this phenomenon is likely to provide a new genre of therapeutics in the combat against CVD.[17] Additionally, an increased central pulse pressure occurs when the large conduit blood vessels lose their elasticity and become less able to accommodate all of the blood ejected from the heart. This increase in pressure results in an increase in central systolic BP and causes an increase in the stress imposed on the left ventricle, which in turn can result in left ventricular hypertrophy (LVH).[18] Elevated LV mass is an initial compensatory mechanism to normalise wall stress due to elevated BP.



1  
2  
3 However, this cardiac remodelling eventually becomes maladaptive with an increase in myocardial  
4 oxygen consumption, cardiac chamber dilation, reduced LV contractility and progressive deterioration  
5 to heart failure.[19] The measure of LVH as a prognostic indicator of adverse outcome was first  
6 convincingly identified in the Framingham study,[20] and numerous studies since have confirmed the  
7 strong relationship between LVH and CV events and mortality.[21,22] Perhaps, more importantly, LV  
8 mass reduction is associated with further improvements in CV outcomes.[23,24]  
9

10  
11  
12  
13  
14  
15 It has been proposed that insufficient supply of endogenous NO likely contributes to the progression  
16 and worsening of arterial stiffness and LVH.[25] Pre-clinical studies have demonstrated that an  
17 elevation of systemic nitrite levels reduces cardiac hypertrophy in mice.[26] Moreover, administration  
18 of inorganic nitrate reduces PWV healthy volunteers and hypertensive patients in short term  
19 studies.[13,27] It is also possible that decreasing arterial stiffness improves ventricular-arterial  
20 coupling which might result in benefits in cardiac function.[28]  
21  
22  
23  
24  
25

26  
27 The objective of this study is to determine whether a dietary nitrate intervention might elevate the  
28 levels of NO in the body sufficiently to alter both heart and blood vessel remodelling in hypertensive  
29 patients with suboptimal BP control.  
30  
31  
32  
33  
34  
35  
36  
37  
38  
39  
40  
41  
42  
43  
44  
45  
46  
47  
48  
49  
50  
51  
52  
53  
54  
55  
56  
57  
58  
59  
60

## **METHODOLOGY**

### **Trial objectives**

*Aims of research:* We wish to test the hypothesis that dietary supplementation of inorganic nitrate (in beetroot juice) elevates circulating nitrate and nitrite levels ultimately delivering NO to the vasculature and thereby improving endothelial, vascular and cardiac function in patients with treated yet uncontrolled hypertension. Specifically, the aim is to investigate whether prolonged dietary nitrate ingestion in hypertensive patients with suboptimal BP control, can cause reductions in LV mass and PWV.

### **Participant selection**

This is a single-centre study, in which patients will be identified and recruited at Barts Health NHS Trust. In addition, other participant identification centres will be used to identify suitable participants via the NIHR Clinical Research Network and local NHS Trusts.

### **Original hypothesis**

Dietary inorganic nitrate ingestion, in addition to existing pharmacological therapy, reduces BP leading to reductions in LV mass and arterial stiffness.

### **Primary end points**

The primary end points are change in LV mass, determined using cardiovascular magnetic resonance imaging (CMR) (NITRATE-LVH arm) and a change in central systolic BP and PWV (NITRATE-CBP arm).

### **Secondary end points**

Secondary endpoints are change in ultrasound determined brachial artery flow-mediated dilation (FMD), change in plasma nitrate and nitrite levels and a change in peripheral BP.

### **Exploratory end points**

Exploratory end points for cardiac imaging include a change in aortic distensibility, LV systolic and diastolic function, LV volumes and ejection fraction, left atrial volumes and function and markers of myocardial fibrosis and oedema. We will assess changes in 12-lead ECG parameters of LVH. With regards to BP, we will assess for changes in BP variability, BP control rate and BP circadian pattern. We will also perform analysis of the salivary microbiome. Finally, we will assess changes in quality of life score (EQ-5D questionnaire) and biochemical measures e.g. urine albumin excretion, cholesterol fractions, B-natriuretic peptide (BNP) and troponin T.

### Inclusion criteria

A subject will be eligible for inclusion in this study only if all of the following criteria apply:

1. Patients will be enrolled following an informed consent.
2. Aged 18-80 years.
3. The study subjects will be hypertensive with evidence of difficulty treating to target BP (daytime ABPM 135-170 and/or 85-105 mm Hg) on 1 or more antihypertensive agent, with insufficient efficacy or intolerance of medications.
4. For the NITRATE-LVH arm, echocardiographic evidence of LVH (LV mass indexed to body surface area (BSA); males > 115 g/m<sup>2</sup>; females > 95 g/m<sup>2</sup>).
5. Patients will have been established on an antihypertensive treatment regime for at least 1 month by the time of participation in the study and will not require changes in pharmacological intervention for the duration of the trial.

### Exclusion criteria

Unless specified, a subject will not be eligible for inclusion in this study if any of the following criteria apply:

1. History of chronic viral hepatitis (including presence of hepatitis B surface antigen or hepatitis C antibody), or other chronic hepatic disorders.
2. History of increased liver function tests (ALT, AST) due to acute or chronic liver conditions, 3x above the upper limit of normal or bilirubin 1.5x above the upper limit of normal at screening.
3. Renal impairment with creatinine clearance (eGFR) of < 50 ml/min at screening.
4. Patients with diabetes mellitus, defined by previous history of diabetes or HbA1c > 6.5% (> 48 mmol/mol) at screening.
5. Subjects with LDLc, > 7.5 mmol/l and/or triglyceride level > 10 mmol/l.
6. History of heart failure defined as NYHA class II - IV or those with known LV dysfunction (LV ejection fraction < 40%) regardless of symptomatic status.
7. History of malignancy within the past 5 years, other than non-melanoma skin cancer.
8. Current life-threatening condition other than vascular disease (e.g. very severe chronic airways disease, HIV positive, life-threatening arrhythmias) that may prevent a subject from completing the study.

- 1
- 2
- 3 9. Use of an investigational device or investigational drug within 30 days or 5 half-lives
- 4 (whichever is longer) preceding the first dose of study medication.
- 5
- 6 10. Subjects who will commence or who are likely to commence regular treatment with non-
- 7 steroidal anti-inflammatory drugs (NSAIDs) (other than aspirin), from screening until study
- 8 completion.
- 9
- 10 11. Any non-stable dosing of ongoing medication regimens throughout the study trial.
- 11
- 12 12. Drug abuse within the past 6 months.
- 13
- 14 13. The subject has a three-month prior history of regular alcohol consumption exceeding an
- 15 average weekly intake of > 28 units (or an average daily intake of greater than 3 units) for
- 16 males, or an average weekly intake of > 21 units (or an average daily intake of greater than 2
- 17 units) for females. 1 unit is equivalent to a half-pint (284mL) of beer/lager; 25mL measure of
- 18 spirits or 125mL of wine.
- 19
- 20 14. Any other subject whom the Investigator deems unsuitable for the study (e.g. due to other
- 21 medical reasons, laboratory abnormalities, expected study medication noncompliance, or
- 22 subject's unwillingness to comply with all study-related study procedures).
- 23
- 24 15. Subjects with rheumatoid arthritis, connective tissue disorders and other conditions known
- 25 to be associated with chronic inflammation (e.g. Inflammatory Bowel Disease).
- 26
- 27 16. Subjects with any acute infection, or recent systemic (oral or IV) antibiotics within 1 month of
- 28 screening, or significant trauma (burns, fractures).
- 29
- 30 17. Subjects who have donated more than 500 mL of blood within 56 days prior to the study
- 31 medication administration.
- 32
- 33 18. Self-reported use of anti-microbial mouthwash or tongue scrapes.
- 34
- 35 19. Concomitant xanthine oxidase inhibitors (such as allopurinol).
- 36
- 37 20. Known history of significant claustrophobia, previous intolerance of CMR imaging or known
- 38 (or suspected) incompatible metallic implant.
- 39
- 40 21. Pregnancy.
- 41
- 42 22. Allergy to gadolinium-based contrast agents used for CMR.
- 43
- 44 23. Patients with known LVH caused by another established pathology diagnosed prior to or at
- 45 screening e.g. severe aortic stenosis, hypertrophic cardiomyopathy, amyloidosis and Fabry
- 46 disease.
- 47
- 48
- 49
- 50
- 51
- 52
- 53
- 54

55 Exceptions to the exclusion criteria:

- 56
- 57 • For criteria 18, patients can enter the trial if they discontinue the use of anti-microbial
- 58 mouthwash for the duration of the clinical trial.
- 59
- 60

- Criteria 20 and 22 do not apply to participants who will not have a CMR scan in the NITRATE-CBP arm.

### **Study design and intervention**

This is a prospective double-blind, placebo-controlled, clinical study. A total of 160 patients (male and female, age 18–80) with hypertension as per requirements indicated above will be recruited. Figure 1 shows a summary of the study scheme. Patients will be stratified at screening into 2 arms. Participants with LVH at screening echocardiography will enter the NITRATE-LVH arm (n=80) whilst those who do not have LVH but satisfy the other eligibility criteria will enter the NITRATE-CBP arm (n=80). LVH is defined by increased LV mass determined by acquiring a parasternal long axis image and subsequently measured for the interventricular septal wall thickness, end-diastolic LV cavity diameter and posterior LV wall thickness according to published guidelines.[29] LV mass is calculated as previously described and indexed to body surface area (BSA).[30]

All visits will take place at the William Harvey Heart Centre, Queen Mary University of London and Barts Heart Centre, St Bartholomew's Hospital, Barts Health NHS Trust. Patients will be randomised to receive 70 mL of a beetroot juice concentrate containing ~6 mmol nitrate or nitrate-depleted placebo juice concentrate (James White Drinks, UK) control. The volunteers will start taking their daily dose after completion of their baseline visit (visit 1) for 16 weeks. Patients will be advised to take their dose of juice at the same time each day, preferably in the morning with their breakfast. Patients will be provided with dietary advice in relation to the calorific content of interventions (both ~100kcal). In addition to baseline and 16 week visits, patients will return to the clinic at 8 weeks for collection of samples for NOx analysis and for discussion of any adherence issues.

### **Randomisation and blinding process**

Patients will be block randomised on a 1:1 basis to receive either dietary nitrate or placebo, using a binary random number sequence (<http://www.random.org>). Treatment assignment for volunteers in the dietary nitrate and placebo groups will remain blinded until data lock and statistical analysis at the end of the study. If unblinding is required, the chief investigator for the study will be informed. A list of the unblinded treatments will be kept in a secure location at the Barts Cardiovascular Clinical Trials Unit (CVCTU). The unblinding procedure will be available at all times.

### **Patient and public involvement**

1  
2  
3 Patients were directly involved in the design and planning of the study. Twenty previous Barts Health  
4 NHS Trust patients were surveyed regarding aspects of trials involving dietary interventions, which  
5 informed this protocol.  
6  
7  
8  
9

### 10 **Study start and end dates**

11 Recruitment commenced on 23<sup>rd</sup> March 2017. The provisional end date for recruitment is September  
12 2020.  
13  
14  
15

### 16 **Methods to be used**

#### 17 **Blood, saliva and urine analysis**

18 In this study, venous blood will be taken using a 21-gauge butterfly needle at each visit. Blood samples  
19 will be centrifuged immediately and plasma separated. The plasma samples will be snap frozen in  
20 liquid nitrogen and stored at -80°C. These samples will be used for the purposes of making  
21 biochemical measurements and will be discarded once used. Similarly, saliva and urine will be  
22 collected at each visit. Saliva will be centrifuged, and a pellet generated. This pellet contains oral  
23 bacteria that have dislodged from the oral cavity. This pellet will be frozen for later analysis of oral  
24 bacteria by second-generation genome sequencing.  
25  
26  
27  
28  
29  
30  
31  
32

33 Nitrate and nitrite levels in saliva, blood and urine samples will be determined using ozone  
34 chemiluminescence as previously described.[31,32] In brief, total nitrate and nitrite concentration  
35 (termed 'NOx') will be determined by adding samples to 0.1mol/L vanadium (III) chloride in 1M  
36 hydrochloric acid refluxing at 95°C under nitrogen. Nitrite concentration will be determined by the  
37 addition of samples to 0.09 mol/L potassium iodide in glacial acetic acid under nitrogen at room  
38 temperature. Nitrate concentration will be calculated by the subtraction of [nitrite] from [NOx]. All  
39 measurements will be conducted by an individual blinded to the intervention. In addition, a sample  
40 from each batch of juice sent to each volunteer will be analysed for NOx content.  
41  
42  
43  
44  
45  
46  
47  
48

#### 49 **Pulse wave analysis and pulse wave velocity**

50 Pulse wave analysis (PWA) and PWV are measures of arterial stiffness, which will be determined by a  
51 non-invasive Vicorder device (Skidmore Medical Limited, Bristol, UK). For PWA, the pulse wave will  
52 be recorded from the brachial cuff applied to the non-dominant arm. For PWV, the pulse wave will be  
53 simultaneously recorded from the carotid and femoral site using an oscillometric method. A small,  
54 inflatable neck pad will be placed directly over a carotid artery and secured around the neck by a  
55 Velcro tab and a cuff will also be placed around the patient's ipsilateral upper thigh. Both carotid and  
56  
57  
58  
59  
60

1  
2  
3 femoral cuffs will be simultaneously inflated automatically to 65 mm Hg and the corresponding  
4 oscillometric signal from each cuff digitally analysed to extract the pulse time delay. To estimate the  
5 aortic length, the distance between the sternal notch and the thigh cuff will be measured. From these  
6 measurements, PWV can be derived as  $PWV = \text{aortic distance}/\text{pulse time delay}$ . [33]  
7  
8  
9

### 10 11 **Flow-mediated dilation**

12 FMD will be used to non-invasively assess endothelial function, using vascular ultrasound to measure  
13 the increase in brachial artery diameter in response to increased flow [34] as previously described. [35]  
14 A high-resolution external vascular ultrasound Siemens/Acuson Sequoia C256 Colour Doppler with a  
15 7.0-MHz linear-array transducer supported by a stereotactic clamp will be used to assess the vessel  
16 diameter in the right arm. The vessel will be scanned in longitudinal section and the centre will be  
17 identified when the clearest views of the anterior and posterior artery walls have been obtained.  
18 Images will be magnified with a resolution box function and images of the brachial artery acquired  
19 continuously using semi-automated edge detection software (FMD Studio, Quipu s.r.l, Pisa, Italy) and  
20 analysed in real time. An automatic mathematical contour tracking operator locates the pulsed-wave  
21 Doppler of the brachial artery which will be used to measure the diameter and blood flow velocity  
22 continuously for 1 minute at baseline, then during 5 minutes of reduced blood flow (induced by  
23 inflation to 300 mm Hg of a pneumatic cuff placed on the right forearm site distal to the segment of  
24 artery being analysed), and finally for a further 5 minutes during reactive hyperaemia following cuff  
25 release. FMD is defined as the maximum percentage increase in vessel diameter during reactive  
26 hyperaemia. This procedure will be performed at visit 1 (baseline) and visit 3 (16 weeks). In some  
27 volunteers, following FMD, 0.4 mg of sublingual GTN (glyceryl trinitrate) will be administered at visit  
28 1 and visit 3 to determine whether changes in FMD responses following intervention might be due to  
29 changes in smooth muscle reactivity.  
30  
31  
32  
33  
34  
35  
36  
37  
38  
39  
40  
41  
42  
43  
44

### 45 **Transthoracic echocardiography**

46 At visit 1 and 3, echocardiography is also performed to assess LV diastolic function. Images will be  
47 acquired for measures of LV diastolic function including left atrial end-diastolic volumes, pulmonary  
48 vein s/d ratio, mitral valve E/A ratio and E/e'. [29,36] Images will be acquired and analysed by an  
49 operator accredited by the British Society of Echocardiography.  
50  
51  
52  
53  
54

### 55 **CMR**

56 The most accurate and reproducible measurements of LVH are made by CMR. [37] At visits 1 and 3,  
57 CMR in the NITRATE-LVH arm and those that consent in the NITRATE-CBP arm will be used to assess  
58  
59  
60

1  
2  
3 LV mass, volumes and ejection fraction, T1 and T2 mapping, patterns of late gadolinium enhancement  
4 (LGE), aortic distensibility and PWV. Participants will have a peripheral venous cannula inserted and  
5 gadolinium injected at doses up to 0.2 mmol/kg.  
6  
7  
8  
9

10 To allow a thorough assessment of cardiac function, the following imaging sequences will be  
11 undertaken:  
12  
13

- 14 • Scout images, including black and white blood transverse slices of the thorax
- 15 • Long axis cines (4-chamber, 2-chamber, LVOT-1, LVOT-2, aortic valve short axis)
- 16 • Short axis cine stack
- 17 • T1 and T2 mapping
- 18 • LGE in the 4-chamber, 2-chamber, 3-chamber views and short axis stack
- 19 • Post contrast T1 mapping for extra-cellular volume (ECV) quantification
- 20 • Sagittal aortic views and aortic flow sequences for assessment of aortic distensibility and PWV.

21  
22 Short axis images will be acquired using standard sequences i.e. 10 – 12 slices of 8mm thickness with  
23 2mm gap to achieve whole LV coverage. This is undertaken with the patient in held expiration. Cine  
24 and LGE short axis stacks will be acquired using identical scanning geometry to assure correct image  
25 registration.  
26  
27  
28

29 The following offline parameters will be measured:  
30  
31  
32  
33  
34

- 35 • Presence of significant extra cardiac pathology
- 36 • Left ventricular ejection fraction, volumes and mass
- 37 • Distribution of LGE
- 38 • Analysis of pre and post contrast T1 mapping and T2 mapping. Short axis images will be  
39 segmented according to the AHA model as previously described[38]
- 40 • Aortic distensibility and pulse wave velocity.

41  
42 For the analysis of study outcomes, each study will be anonymised by a third party. This will be  
43 separate from the study ID to avoid bias between pre- and post-treatment studies. Documentation of  
44 this anonymisation will be stored on a secure server at the Barts CVCTU, with unblinding for clinical  
45 reasons as necessary. The PI will be informed if this is necessary. Study analysis will occur in batches  
46 to prevent bias. For the assessment of LV volumes and mass, 2 readers will undertake assessment of  
47  
48  
49  
50  
51  
52  
53  
54  
55  
56  
57  
58  
59  
60



inter and intra observer variation prior to analysis of blinded study images. Image analysis will be overseen and adjudicated by an experienced level 3 CMR reader (JCM).

### **End of study definition**

The study will end after the final visit at week 16.

### **STATISTICAL ANALYSIS**

In this study, we intend to recruit 80 patients in each treatment arm with stratification of 80 patients overall recruited to NITRATE-LVH and 80 recruited to the NITRATE-CBP arms (total n=160). This sample size will empower our trial to test for the primary and all major secondary endpoints listed below.

We determined the sample size using G\*Power 3.0. Calculations were based on unpaired t-tests, a significance level of 0.05 (two-tailed) and the relevant standard deviations of the mean difference from published studies with reproducibility data: central systolic BP 1.7 mm Hg,[39] LV mass 9.9g,[40] CMR PWV 0.45 m/s,[41] Vicorder PWV 0.29 m/s.[41] For BP, we used measures of SD of systolic BP (as it has greater SD than diastolic BP) from the placebo limb of our previous intervention trial in hypertensive patients[13]: clinic systolic BP 8.4 mm Hg; ambulatory systolic BP 4.9 mm Hg; home systolic BP 3.9 mm Hg. International consensus documents on the optimal method for ultrasound FMD suggest using lab-specific data in sample size calculation and have suggested that 40 participants in a parallel study are sufficient to determine statistically important differences.[35] In a study of 4 week dietary nitrate intervention in hypertensive patients, SD of repeated measures of FMD in the placebo group was 0.6, whilst the mean difference between the groups was 1.0% [13], a SD of 1.1 .

### **Primary endpoints**

For the individual stratified sub-groups:

**NITRATE-LVH:** For the primary endpoint of LV mass regression we have a power of 95% for detecting a 9g LV mass change (~6% change for a mildly hypertrophied heart of 150 g). Previously published data showed a 10% reduction in LV mass in hypertensives after 3 months treatment with spironolactone.[42] Furthermore, dietary advice aimed at BP reduction in the TOMHS study demonstrated mean 9/9 mm Hg BP reduction and ~20g LV mass reduction from baseline ~200g (by echocardiography) at 3 months post intervention, representing ~10% reduction in LV mass.[43]

1  
2  
3 **NITRATE-CBP:** For non-CMR PWV we have a power of > 95% for detecting a 0.6 m/s absolute change  
4 (previously demonstrated following 4 weeks dietary nitrate in hypertensive patients[13]). For CMR  
5 determined PWV we have a power of > 95% for detecting a 0.6 m/s absolute change.[13] For our  
6 primary end point of reduction in central systolic BP we expect a scaled reduction in BP relative to  
7 observed decreases in brachial BP (8.7 mm Hg clinic brachial systolic BP)[13] though evidence suggests  
8 that low-dose intravenous nitrite infusions act to selectively lower central BP in preference to brachial  
9 BP and therefore expected differences may be larger.[44] Nevertheless, using our conservative  
10 estimate based on two-thirds brachial BP effect, we have > 90% power to detect a 5.8 mm Hg  
11 difference in central systolic BP.  
12  
13  
14  
15  
16  
17  
18  
19

20 In post hoc analyses data will be combined from the 2 groups to assess the overall impact of inorganic  
21 nitrate versus placebo on the entire cohort for BP, nitrate and nitrite analysis. In addition, correlation  
22 analyses will be conducted using Pearson's correlation between measures of NOx, LV mass, BP and  
23 PWV.  
24  
25  
26  
27

### 28 **Secondary endpoints**

29  
30 a) Ultrasound FMD (%), > 90% power for detecting a 1.0% absolute change from a reduced FMD of  
31 ~5%.[13]  
32

#### 33 b) Brachial BP

34  
35 i) Clinic > 85% power to detect 7 mm Hg absolute change.[13]

36 ii) Ambulatory > 95% power to detect 7 mm Hg absolute change.[13]

37  
38 iii) Home > 85% power to detect 7 mm Hg absolute change.[13] The change observed in our 4  
39 week study was ~7 mm Hg[13] but with reduced measurement frequency, the possibility of  
40 increase measurement variability and therefore SD was arbitrarily doubled for this calculation.  
41  
42  
43  
44

45 Our sample size calculations assume a drop-out rate of 15% (non-compliance with dietary intervention  
46 or follow-up visits) based on our centres previous observations.  
47  
48  
49

50 Data will be analysed on an intention to treat basis. The data will be compared by multivariable  
51 regression analysis for each functional measure. The change from baseline in pre-specified primary,  
52 secondary and exploratory outcomes will be compared between groups by Student's t-test. We will  
53 adjust the results for multiple variables: sex, age, weight, body mass index and the initial differences  
54 between groups in LV mass.  
55  
56  
57  
58  
59  
60

### **Ethical considerations**

The NIHR Barts Biomedical Research Centre Patient and Public Advisory Group reviewed this protocol prior to submission to the Research Ethics Committee (REC). The study protocol and any subsequent amendments, along with materials provided to participants and advertising material, was submitted to London - City and East REC. Written approval from the REC was obtained along with final sponsorship and NHS Health Research Authority (HRA) approval.

### **Safety considerations**

The intervention is 70 mL of beetroot juice concentrate or nitrate-deplete beetroot juice (placebo; James White Drinks, UK). The nitrate is extracted using the same anion exchange technique to remove inorganic nitrate from the general drinking water supplies. There are no known serious side effects from these interventions and nitrate-free juice is classified as a foodstuff. In addition, several recent publications using the placebo juice are now available.[45–47] In the unlikely event of a serious adverse event (SAE) occurring directly as a result of the intervention, this would need to be reviewed by the chief investigator and the procedures followed as described below.

### **Safety reporting**

An AE will be documented in the participants' medical notes and the case report form (CRF) and followed up by the investigators. Serious adverse events (SAEs) will be reported to the sponsor and REC where in the opinion of the chief investigator the event was either 'related' (i.e., resulted from administration of research procedures) and 'unexpected' (i.e., the type of event is not an expected occurrence).

SAEs considered to be 'related' and 'unexpected' will be recorded in the participants' notes, the sponsor SAE form and reported to the sponsor's joint research management office (JRMO) within 24 hours of the research team being notified, and to the main REC within 15 days. The co-investigators will be authorised to sign SAE forms in the absence of the PI. The intervention for the participant will be unblinded in the reporting of an 'unexpected and related' SAE, performed by an individual independent of the study procedures and will allow the investigators to remain blinded. The unblinding of single cases will only be performed if necessary for the safety of a participant.

### **MONITORING**

#### **Trial Steering Committee (TSC)**

1  
2  
3 The TSC is composed of three independent experts in the fields of: cardiac MRI, hypertension and  
4 clinical trials along with the investigators and the data monitor and two lay members. This committee  
5 met before participant recruitment and will meet annually to assess safety, feasibility or any other  
6 arising problems and their recommendations followed.  
7  
8  
9

### 10 11 **Data Safety and Monitoring Board (DSMB)**

12 The trial is classified as low-risk and does not require the formal setting up of a DSMB, however a  
13 DSMB has been established comprising a Clinical Trials Physician, Statistician and Cardiovascular  
14 Physician. The DSMB met to review data after 20 patients in each study arm had completed their  
15 involvement, to advise about planned sample size and safety signals. The study will be subject to  
16 monitoring by the Sponsor, Queen Mary University of London, in accordance with their policies. Any  
17 monitoring findings will be relayed to the TSC by the Chief Investigator and acted in the best interest  
18 of patients, sponsor and funder.  
19  
20  
21  
22  
23  
24  
25

### 26 27 **Dissemination**

28 The study will be performed in agreement with the Declaration of Helsinki and is approved by the  
29 Local REC (London – City and East; 10/H0703/98). Data collection will be completed by the third  
30 quarter of 2020. Primary and secondary analysis will start immediately after data collection is  
31 completed, with an aim to prepare publications for submission in 2021. The results of the trial will be  
32 published according to the CONSORT statement. Dissemination of results will be in peer-reviewed  
33 journal publications and presentations at national and international conferences. NITRATE-TOD is  
34 registered on Clinicaltrials.gov (NCT03088514).  
35  
36  
37  
38  
39  
40

### 41 42 **Summary**

43 This is the first randomised-controlled trial assessing the use of prolonged dietary nitrate treatment  
44 in hypertension-induced target organ damage, specifically LVH and arterial stiffness. This study will  
45 determine the potential of prolonged dietary nitrate as adjunctive therapy in patients with sub  
46 optimally controlled hypertension on anti-hypertensive medication.  
47  
48  
49  
50

51  
52 **Contributors:** All authors listed above fulfil all three International Committee of Medical Journal  
53 Editors (ICMJE) guidelines for authorship, which are (1) substantial contributions to conception and  
54 design, acquisition of data or analysis, and interpretation of data; (2) drafting the article or revising it  
55 critically for important intellectual content; and (3) final approval of the version to be published. AA  
56 raised the funding. AA and VK designed the study. CWZL was responsible for coordinating the  
57  
58  
59  
60

1  
2  
3 contribution of all authors to this paper. AA, VK, JM and CWZL developed the protocol. CWZL and AJPH  
4 are involved the acquisition of data or data analysis. CWZL, KR, JC, AS and CP were responsible for  
5 drafting this paper. AM, CD, JM, VK and AA were responsible for editing and providing guidance on  
6 the paper. All authors were responsible for critically revising the paper. All authors approved the final  
7 version of this paper for submission. This study is supported by the CVCTU, a branch of the Barts CTU  
8 UKCRC Reg No. 4.  
9  
10  
11  
12  
13  
14

15 **Funding:** CWZL and this work are funded by a grant from Barts Charity.  
16  
17

18 **Competing interests:** AA is a co-director of Heartbeat Ltd, which is a start-up company that seeks to  
19 identify commercial potential of dietary nitrate.  
20  
21  
22  
23  
24  
25  
26  
27  
28  
29  
30  
31  
32  
33  
34  
35  
36  
37  
38  
39  
40  
41  
42  
43  
44  
45  
46  
47  
48  
49  
50  
51  
52  
53  
54  
55  
56  
57  
58  
59  
60

## REFERENCES

- 1 Lim SS, Vos T, Flaxman AD, *et al.* A comparative risk assessment of burden of disease and injury attributable to 67 risk factors and risk factor clusters in 21 regions, 1990–2010: a systematic analysis for the Global Burden of Disease Study 2010. *Lancet* 2012;**380**:2224–60. doi:10.1016/S0140-6736(12)61766-8
- 2 Forouzanfar MH, Liu P, Roth GA, *et al.* Global Burden of Hypertension and Systolic Blood Pressure of at Least 110 to 115 mm Hg, 1990–2015. *JAMA* 2017;**317**:165. doi:10.1001/jama.2016.19043
- 3 Vos T, Alemu Abajobir A, Hassen Abate K, *et al.* Global, regional, and national incidence, prevalence, and years lived with disability for 328 diseases and injuries for 195 countries, 1990–2016: a systematic analysis for the Global Burden of Disease Study 2016. *Lancet* 2017;**390**:1211–59. <https://vizhub>. (accessed 9 Apr 2019).
- 4 WHO WHO. Global status report on noncommunicable diseases 2014. Geneva: 2014. [http://apps.who.int/iris/bitstream/handle/10665/148114/9789241564854\\_eng.pdf;jsessionid=FD9481BC2C213324152C9CDB8D3740DF?sequence=1](http://apps.who.int/iris/bitstream/handle/10665/148114/9789241564854_eng.pdf;jsessionid=FD9481BC2C213324152C9CDB8D3740DF?sequence=1)
- 5 Appel LJ, Moore TJ, Obarzanek E, *et al.* A Clinical Trial of the Effects of Dietary Patterns on Blood Pressure. *N Engl J Med* 1997;**336**:1117–24. doi:10.1056/NEJM199704173361601
- 6 Joshipura KJ, Hu FB, Manson JE, *et al.* The Effect of Fruit and Vegetable Intake on Risk for Coronary Heart Disease. *Ann Intern Med* 2001;**134**:1106. doi:10.7326/0003-4819-134-12-200106190-00010
- 7 Lundberg JO, Feelisch M, Björne H, *et al.* Cardioprotective effects of vegetables: Is nitrate the answer? *Nitric Oxide* 2006;**15**:359–62. doi:10.1016/j.niox.2006.01.013
- 8 Ghosh SM, Kapil V, Fuentes-Calvo I, *et al.* Enhanced Vasodilator Activity of Nitrite in Hypertension Novelty and Significance. *Hypertension* 2013;**61**.
- 9 Kapil V, Milsom AB, Okorie M, *et al.* Inorganic Nitrate Supplementation Lowers Blood Pressure in Humans. *Hypertension* 2010;**56**:274–81. doi:10.1161/HYPERTENSIONAHA.110.153536
- 10 Webb AJ, Patel N, Loukogeorgakis S, *et al.* Acute blood pressure lowering, vasoprotective, and antiplatelet properties of dietary nitrate via bioconversion to nitrite. *Hypertens (Dallas, Tex 1979)* 2008;**51**:784–90. doi:10.1161/HYPERTENSIONAHA.107.103523
- 11 Tannenbaum SR, Weisman M, Fett D. The effect of nitrate intake on nitrite formation in human saliva. *Food Cosmet Toxicol* 1976;**14**:549–52. <http://www.ncbi.nlm.nih.gov/pubmed/1017770> (accessed 20 Jun 2018).
- 12 Duncan C, Dougall H, Johnston P, *et al.* Chemical generation of nitric oxide in the mouth from the enterosalivary circulation of dietary nitrate. *Nat Med* 1995;**1**:546–51. <http://www.ncbi.nlm.nih.gov/pubmed/7585121> (accessed 20 Jun 2018).
- 13 Kapil V, Khambata RS, Robertson A, *et al.* Dietary nitrate provides sustained blood pressure lowering in hypertensive patients: A randomized, phase 2, double-blind, placebo-controlled study. *Hypertension* 2015;**65**:320–7. doi:10.1161/HYPERTENSIONAHA.114.04675
- 14 Greenwald S. Ageing of the conduit arteries. *J Pathol* 2007;**211**:157–72. doi:10.1002/path.2101
- 15 Laurent S, Cockcroft J, Van Bortel L, *et al.* Expert consensus document on arterial stiffness: methodological issues and clinical applications. *Eur Heart J* 2006;**27**:2588–605. doi:10.1093/eurheartj/ehl254
- 16 Ben-Shlomo Y, Spears M, Boustred C, *et al.* Aortic Pulse Wave Velocity Improves Cardiovascular Event Prediction. *J Am Coll Cardiol* 2014;**63**:636–46. doi:10.1016/j.jacc.2013.09.063
- 17 Boutouyrie P, Laurent S, Briet M. Importance of arterial stiffness as cardiovascular risk factor for future development of new type of drugs. *Fundam Clin Pharmacol* 2008;**22**:241–6. doi:10.1111/j.1472-8206.2008.00584.x

- 1  
2  
3 18 Gradman AH, Alfayoumi F. From Left Ventricular Hypertrophy to Congestive Heart Failure:  
4 Management of Hypertensive Heart Disease. *Prog Cardiovasc Dis* 2006;**48**:326–41.  
5 doi:10.1016/j.pcad.2006.02.001  
6  
7 19 Nadruz W. Myocardial remodeling in hypertension. *J Hum Hypertens* 2015;**29**:1–6.  
8 doi:10.1038/jhh.2014.36  
9  
10 20 Levy D, Garrison RJ, Savage DD, *et al.* Prognostic Implications of Echocardiographically  
11 Determined Left Ventricular Mass in the Framingham Heart Study. *N Engl J Med*  
12 1990;**322**:1561–6. doi:10.1056/NEJM199005313222203  
13  
14 21 Kannel WB. Left ventricular hypertrophy as a risk factor in arterial hypertension. *Eur Heart J*  
15 1992;**13**:82–8. doi:10.1093/eurheartj/13.suppl\_D.82  
16  
17 22 Ruilope LM, Schmieder RE. Left Ventricular Hypertrophy and Clinical Outcomes in  
18 Hypertensive Patients. *Am J Hypertens* 2008;**21**:500–8. doi:10.1038/ajh.2008.16  
19  
20 23 Mathew J, Sleight P, Lonn E, *et al.* Reduction of Cardiovascular Risk by Regression of  
21 Electrocardiographic Markers of Left Ventricular Hypertrophy by the Angiotensin-Converting  
22 Enzyme Inhibitor Ramipril. *Circulation* 2001;**104**:1615–21. doi:10.1161/hc3901.096700  
23  
24 24 Dahlöf B, Devereux RB, Kjeldsen SE, *et al.* Cardiovascular morbidity and mortality in the  
25 Losartan Intervention For Endpoint reduction in hypertension study (LIFE): a randomised trial  
26 against atenolol. *Lancet* 2002;**359**:995–1003. doi:10.1016/S0140-6736(02)08089-3  
27  
28 25 Ruiz-Hurtado G, Delgado C. Nitric oxide pathway in hypertrophied heart: new therapeutic  
29 uses of nitric oxide donors. *J Hypertens* 2010;**28 Suppl 1**:S56–61.  
30 doi:10.1097/01.hjh.0000388496.66330.b8  
31  
32 26 Carlström M, Persson AEG, Larsson E, *et al.* Dietary nitrate attenuates oxidative stress,  
33 prevents cardiac and renal injuries, and reduces blood pressure in salt-induced hypertension.  
34 *Cardiovasc Res* 2011;**89**:574–85. doi:10.1093/cvr/cvq366  
35  
36 27 Bahra M, Kapil V, Pearl V, *et al.* Inorganic nitrate ingestion improves vascular compliance but  
37 does not alter flow-mediated dilatation in healthy volunteers. *Nitric oxide Biol Chem*  
38 2012;**26**:197–202. doi:10.1016/j.niox.2012.01.004  
39  
40 28 Ikonomidis I, Aboyans V, Blacher J, *et al.* The role of ventricular–arterial coupling in cardiac  
41 disease and heart failure: assessment, clinical implications and therapeutic interventions. A  
42 consensus document of the European Society of Cardiology Working Group on Aorta &  
43 Peripheral Vascular Diseases, European Association of Cardiovascular Imaging, and Heart  
44 Failure Association. *Eur J Heart Fail* 2019;**21**:402–24. doi:10.1002/ejhf.1436  
45  
46 29 Lang RM, Badano LP, Mor-Avi V, *et al.* Recommendations for cardiac chamber quantification  
47 by echocardiography in adults: An update from the American society of echocardiography  
48 and the European association of cardiovascular imaging. *Eur Heart J Cardiovasc Imaging*  
49 Published Online First: 2015. doi:10.1093/ehjci/jev014  
50  
51 30 Devereux RB, Alonso DR, Lutas EM, *et al.* Echocardiographic assessment of left ventricular  
52 hypertrophy: comparison to necropsy findings. *Am J Cardiol* 1986;**57**:450–  
53 8.<http://www.ncbi.nlm.nih.gov/pubmed/2936235> (accessed 21 Jun 2018).  
54  
55 31 Ignarro LJ, Fukuto JM, Griscavage JM, *et al.* Oxidation of nitric oxide in aqueous solution to  
56 nitrite but not nitrate: comparison with enzymatically formed nitric oxide from L-arginine.  
57 *Proc Natl Acad Sci U S A* 1993;**90**:8103–7.<http://www.ncbi.nlm.nih.gov/pubmed/7690141>  
58 (accessed 21 Jun 2018).  
59  
60 32 Bush PA, Gonzalez NE, Griscavage JM, *et al.* Nitric oxide synthase from cerebellum catalyzes  
the formation of equimolar quantities of nitric oxide and citrulline from L-arginine. *Biochem  
Biophys Res Commun* 1992;**185**:960–6. doi:10.1016/0006-291X(92)91720-B  
33  
34 33 Hickson SS, Butlin M, Broad J, *et al.* Validity and repeatability of the Vicorder apparatus: a  
comparison with the SphygmoCor device. *Hypertens Res* 2009;**32**:1079–85.  
doi:10.1038/hr.2009.154  
35  
36 34 Celermajer DS, Sorensen KE, Gooch VM, *et al.* Non-invasive detection of endothelial  
dysfunction in children and adults at risk of atherosclerosis. *Lancet* 1992;**340**:1111–5.

- 1  
2  
3 doi:10.1016/0140-6736(92)93147-F  
4 35 Corretti MC, Anderson TJ, Benjamin EJ, *et al.* Guidelines for the ultrasound assessment of  
5 endothelial-dependent flow-mediated vasodilation of the brachial artery: A report of the  
6 International Brachial Artery Reactivity Task Force. *J Am Coll Cardiol* 2002;**39**:257–65.  
7 doi:10.1016/S0735-1097(01)01746-6  
8  
9 36 Wharton G, Steeds R, Allen J, *et al.* A minimum dataset for a standard adult transthoracic  
10 echocardiogram: a guideline protocol from the British Society of Echocardiography. Published  
11 Online First: 2015. doi:10.1530/ERP-14-0079  
12 37 Bottini P, Carr A, Prisant L, *et al.* Magnetic resonance imaging compared to echocardiography  
13 to assess left ventricular mass in the hypertensive patient. *Am J Hypertens* 1995;**8**:221–8.  
14 doi:10.1016/0895-7061(94)00178-E  
15 38 Treibel TA, Kozor R, Schofield R, *et al.* Reverse Myocardial Remodeling Following Valve  
16 Replacement in Patients With Aortic Stenosis. *J Am Coll Cardiol* 2018;**71**:860–71.  
17 doi:10.1016/j.jacc.2017.12.035  
18 39 Siebenhofer A, Kemp C, Sutton A, *et al.* The reproducibility of central aortic blood pressure  
19 measurements in healthy subjects using applanation tonometry and sphygmocardiography. *J*  
20 *Hum Hypertens* 1999;**13**:625–9. <http://www.ncbi.nlm.nih.gov/pubmed/10482972> (accessed  
21 23 May 2017).  
22 40 Hudsmith LE, Petersen SE, Francis JM, *et al.* Normal human left and right ventricular and left  
23 atrial dimensions using steady state free precession magnetic resonance imaging. *J*  
24 *Cardiovasc Magn Reson* 2005;**7**:775–82.  
25 41 Grotenhuis HB, Westenberg JJM, Steendijk P, *et al.* Validation and reproducibility of aortic  
26 pulse wave velocity as assessed with velocity-encoded MRI. *J Magn Reson Imaging*  
27 2009;**30**:521–6. doi:10.1002/jmri.21886  
28 42 Gaddam K, Corros C, Pimenta E, *et al.* Rapid Reversal of Left Ventricular Hypertrophy and  
29 Intracardiac Volume Overload in Patients With Resistant Hypertension and  
30 Hyperaldosteronism: A Prospective Clinical Study. *Hypertension* 2010;**55**:1137–42.  
31 doi:10.1161/HYPERTENSIONAHA.109.141531  
32 43 Liebson PR, Grandits GA, Dianzumba S, *et al.* Comparison of five antihypertensive  
33 monotherapies and placebo for change in left ventricular mass in patients receiving  
34 nutritional-hygienic therapy in the Treatment of Mild Hypertension Study (TOMHS).  
35 *Circulation* 1995;**91**:698–706. <http://www.ncbi.nlm.nih.gov/pubmed/7828296> (accessed 21  
36 Jun 2018).  
37 44 Omar SA, Fok H, Tilgner KD, *et al.* Paradoxical Normoxia-Dependent Selective Actions of  
38 Inorganic Nitrite in Human Muscular Conduit Arteries and Related Selective Actions on  
39 Central Blood Pressures. *Circulation*  
40 2015;**131**. <http://circ.ahajournals.org/content/131/4/381.long> (accessed 23 May 2017).  
41 45 Gilchrist M, Winyard PG, Fulford J, *et al.* Dietary nitrate supplementation improves reaction  
42 time in type 2 diabetes: Development and application of a novel nitrate-depleted beetroot  
43 juice placebo. *Nitric Oxide* 2014;**40**:67–74. doi:10.1016/j.niox.2014.05.003  
44 46 Gilchrist M, Winyard PG, Aizawa K, *et al.* Effect of dietary nitrate on blood pressure,  
45 endothelial function, and insulin sensitivity in type 2 diabetes. *Free Radic Biol Med*  
46 2013;**60**:89–97. doi:10.1016/j.freeradbiomed.2013.01.024  
47 47 Lansley KE, Winyard PG, Bailey SJ, *et al.* Acute dietary nitrate supplementation improves  
48 cycling time trial performance. *Med Sci Sports Exerc* 2011;**43**:1125–31.  
49 doi:10.1249/MSS.0b013e31821597b4  
50  
51  
52  
53  
54  
55  
56  
57  
58  
59  
60



1  
2  
3 **Figure 1 Legend**  
4  
5

6 **Figure 1.** Study protocol. ABPM, ambulatory blood pressure monitor; ECG, electrocardiogram; CMR,  
7 cardiovascular magnetic resonance imaging; FMD, flow mediated dilation; PWA, pulse wave analysis;  
8 PWV, pulse wave velocity.  
9  
10  
11  
12  
13  
14  
15  
16  
17  
18  
19  
20  
21  
22  
23  
24  
25  
26  
27  
28  
29  
30  
31  
32  
33  
34  
35  
36  
37  
38  
39  
40  
41  
42  
43  
44  
45  
46  
47  
48  
49  
50  
51  
52  
53  
54  
55  
56  
57  
58  
59  
60

For peer review only

BMJ Open  
Screening

1  
2  
3  
4  
5  
6  
7  
8  
9  
10  
11  
12  
13  
14  
15  
16  
17  
18  
19  
20  
21  
22  
23  
24

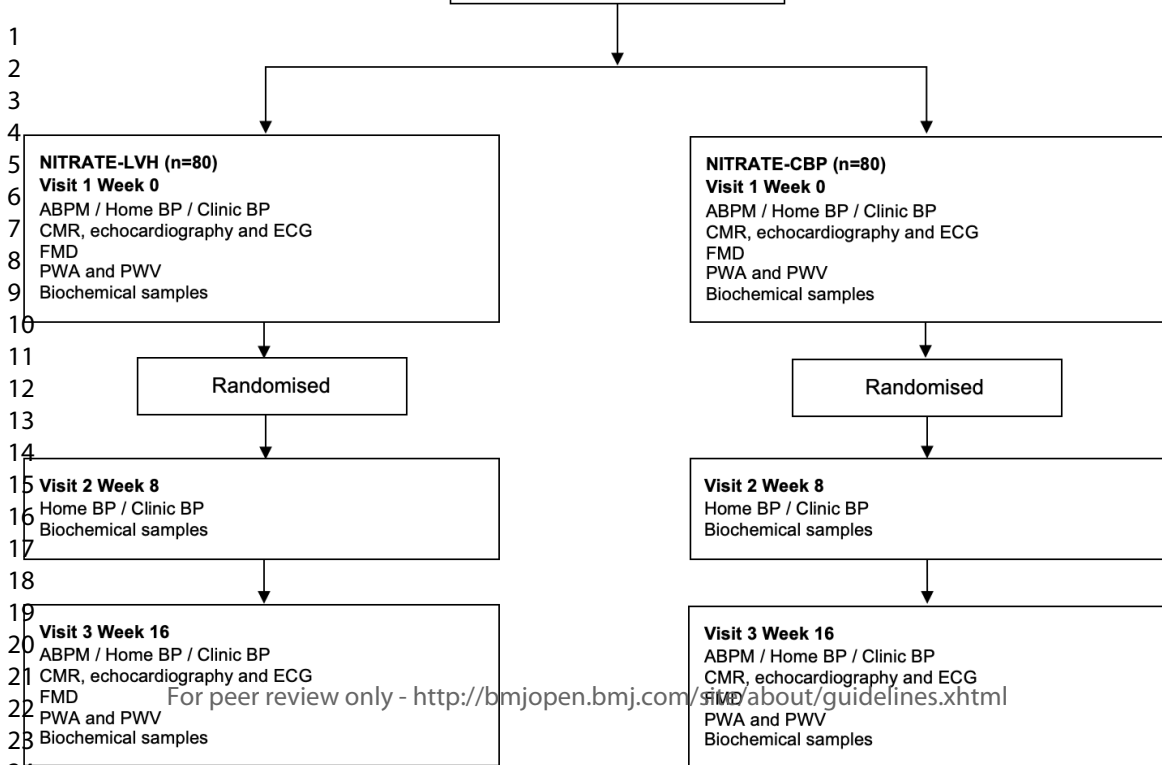

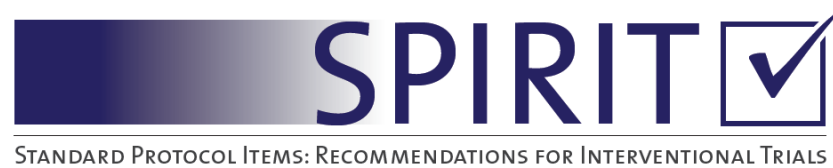

SPIRIT 2013 Checklist: Recommended items to address in a clinical trial protocol and related documents\*

| Section/item                      | Item No | Description                                                                                                                                                                                                                                                                              | Page             | Line no. |
|-----------------------------------|---------|------------------------------------------------------------------------------------------------------------------------------------------------------------------------------------------------------------------------------------------------------------------------------------------|------------------|----------|
| <b>Administrative information</b> |         |                                                                                                                                                                                                                                                                                          |                  |          |
| Title                             | 1       | Descriptive title identifying the study design, population, interventions, and, if applicable, trial acronym                                                                                                                                                                             | 1                | 1        |
| Trial registration                | 2a      | Trial identifier and registry name. If not yet registered, name of intended registry                                                                                                                                                                                                     | 2                | 31       |
|                                   | 2b      | All items from the World Health Organization Trial Registration Data Set                                                                                                                                                                                                                 | In full protocol |          |
| Protocol version                  | 3       | Date and version identifier                                                                                                                                                                                                                                                              | In full protocol |          |
| Funding                           | 4       | Sources and types of financial, material, and other support                                                                                                                                                                                                                              | 17               | 9        |
| Roles and responsibilities        | 5a      | Names, affiliations, and roles of protocol contributors                                                                                                                                                                                                                                  | 1                | 5        |
|                                   | 5b      | Name and contact information for the trial sponsor                                                                                                                                                                                                                                       | 1                | 16       |
|                                   | 5c      | Role of study sponsor and funders, if any, in study design; collection, management, analysis, and interpretation of data; writing of the report; and the decision to submit the report for publication, including whether they will have ultimate authority over any of these activities | In full protocol |          |

|    |                                                           |     |                                                                                                                                                                                                                                                                  |    |    |
|----|-----------------------------------------------------------|-----|------------------------------------------------------------------------------------------------------------------------------------------------------------------------------------------------------------------------------------------------------------------|----|----|
| 1  |                                                           |     |                                                                                                                                                                                                                                                                  |    |    |
| 2  |                                                           |     |                                                                                                                                                                                                                                                                  |    |    |
| 3  |                                                           |     |                                                                                                                                                                                                                                                                  |    |    |
| 4  |                                                           | 5d  | Composition, roles, and responsibilities of the coordinating centre, steering committee, endpoint adjudication committee, data management team, and other individuals or groups overseeing the trial, if applicable (see Item 21a for data monitoring committee) | 16 | 1  |
| 5  |                                                           |     |                                                                                                                                                                                                                                                                  |    |    |
| 6  |                                                           |     |                                                                                                                                                                                                                                                                  |    |    |
| 7  |                                                           |     |                                                                                                                                                                                                                                                                  |    |    |
| 8  |                                                           |     |                                                                                                                                                                                                                                                                  |    |    |
| 9  | <b>Introduction</b>                                       |     |                                                                                                                                                                                                                                                                  |    |    |
| 10 |                                                           |     |                                                                                                                                                                                                                                                                  |    |    |
| 11 | Background and rationale                                  | 6a  | Description of research question and justification for undertaking the trial, including summary of relevant studies (published and unpublished) examining benefits and harms for each intervention                                                               | 4  | 78 |
| 12 |                                                           |     |                                                                                                                                                                                                                                                                  |    |    |
| 13 |                                                           | 6b  | Explanation for choice of comparators                                                                                                                                                                                                                            | 5  | 15 |
| 14 |                                                           |     |                                                                                                                                                                                                                                                                  |    |    |
| 15 | Objectives                                                | 7   | Specific objectives or hypotheses                                                                                                                                                                                                                                | 6  | 2  |
| 16 |                                                           |     |                                                                                                                                                                                                                                                                  |    |    |
| 17 | Trial design                                              | 8   | Description of trial design including type of trial (eg, parallel group, crossover, factorial, single group), allocation ratio, and framework (eg, superiority, equivalence, noninferiority, exploratory)                                                        | 9  | 5  |
| 18 |                                                           |     |                                                                                                                                                                                                                                                                  |    |    |
| 19 |                                                           |     |                                                                                                                                                                                                                                                                  |    |    |
| 20 |                                                           |     |                                                                                                                                                                                                                                                                  |    |    |
| 21 |                                                           |     |                                                                                                                                                                                                                                                                  |    |    |
| 22 |                                                           |     |                                                                                                                                                                                                                                                                  |    |    |
| 23 |                                                           |     |                                                                                                                                                                                                                                                                  |    |    |
| 24 | <b>Methods: Participants, interventions, and outcomes</b> |     |                                                                                                                                                                                                                                                                  |    |    |
| 25 |                                                           |     |                                                                                                                                                                                                                                                                  |    |    |
| 26 | Study setting                                             | 9   | Description of study settings (eg, community clinic, academic hospital) and list of countries where data will be collected. Reference to where list of study sites can be obtained                                                                               | 9  | 15 |
| 27 |                                                           |     |                                                                                                                                                                                                                                                                  |    |    |
| 28 |                                                           |     |                                                                                                                                                                                                                                                                  |    |    |
| 29 | Eligibility criteria                                      | 10  | Inclusion and exclusion criteria for participants. If applicable, eligibility criteria for study centres and individuals who will perform the interventions (eg, surgeons, psychotherapists)                                                                     | 7  | 2  |
| 30 |                                                           |     |                                                                                                                                                                                                                                                                  |    |    |
| 31 |                                                           |     |                                                                                                                                                                                                                                                                  |    |    |
| 32 | Interventions                                             | 11a | Interventions for each group with sufficient detail to allow replication, including how and when they will be administered                                                                                                                                       | 9  | 16 |
| 33 |                                                           |     |                                                                                                                                                                                                                                                                  |    |    |
| 34 |                                                           |     |                                                                                                                                                                                                                                                                  |    |    |
| 35 |                                                           | 11b | Criteria for discontinuing or modifying allocated interventions for a given trial participant (eg, drug dose change in response to harms, participant request, or improving/worsening disease)                                                                   | 15 | 32 |
| 36 |                                                           |     |                                                                                                                                                                                                                                                                  |    |    |
| 37 |                                                           |     |                                                                                                                                                                                                                                                                  |    |    |
| 38 |                                                           |     |                                                                                                                                                                                                                                                                  |    |    |
| 39 |                                                           |     |                                                                                                                                                                                                                                                                  |    |    |
| 40 |                                                           |     |                                                                                                                                                                                                                                                                  |    |    |
| 41 |                                                           |     |                                                                                                                                                                                                                                                                  |    |    |
| 42 |                                                           |     |                                                                                                                                                                                                                                                                  |    |    |
| 43 |                                                           |     |                                                                                                                                                                                                                                                                  |    |    |
| 44 |                                                           |     |                                                                                                                                                                                                                                                                  |    |    |
| 45 |                                                           |     |                                                                                                                                                                                                                                                                  |    |    |
| 46 |                                                           |     |                                                                                                                                                                                                                                                                  |    |    |

NITRATE-TOD SPIRIT checklist V2.0 11/11/2019

|    |                      |     |                                                                                                                                                                                                                                                                                                                                                                                |          |    |
|----|----------------------|-----|--------------------------------------------------------------------------------------------------------------------------------------------------------------------------------------------------------------------------------------------------------------------------------------------------------------------------------------------------------------------------------|----------|----|
| 1  |                      |     |                                                                                                                                                                                                                                                                                                                                                                                |          |    |
| 2  |                      |     |                                                                                                                                                                                                                                                                                                                                                                                |          |    |
| 3  |                      |     |                                                                                                                                                                                                                                                                                                                                                                                |          |    |
| 4  |                      | 11c | Strategies to improve adherence to intervention protocols, and any procedures for monitoring adherence (eg, drug tablet return, laboratory tests)                                                                                                                                                                                                                              | 9        | 22 |
| 5  |                      |     |                                                                                                                                                                                                                                                                                                                                                                                |          |    |
| 6  |                      |     |                                                                                                                                                                                                                                                                                                                                                                                |          |    |
| 7  |                      | 11d | Relevant concomitant care and interventions that are permitted or prohibited during the trial                                                                                                                                                                                                                                                                                  | NA       | NA |
| 8  |                      |     |                                                                                                                                                                                                                                                                                                                                                                                |          |    |
| 9  | Outcomes             | 12  | Primary, secondary, and other outcomes, including the specific measurement variable (eg, systolic blood pressure), analysis metric (eg, change from baseline, final value, time to event), method of aggregation (eg, median, proportion), and time point for each outcome. Explanation of the clinical relevance of chosen efficacy and harm outcomes is strongly recommended | 6        | 19 |
| 10 |                      |     |                                                                                                                                                                                                                                                                                                                                                                                |          |    |
| 11 |                      |     |                                                                                                                                                                                                                                                                                                                                                                                |          |    |
| 12 |                      |     |                                                                                                                                                                                                                                                                                                                                                                                |          |    |
| 13 |                      |     |                                                                                                                                                                                                                                                                                                                                                                                |          |    |
| 14 | Participant timeline | 13  | Time schedule of enrolment, interventions (including any run-ins and washouts), assessments, and visits for participants. A schematic diagram is highly recommended (see Figure)                                                                                                                                                                                               | Figure 1 |    |
| 15 |                      |     |                                                                                                                                                                                                                                                                                                                                                                                |          |    |
| 16 |                      |     |                                                                                                                                                                                                                                                                                                                                                                                |          |    |
| 17 |                      |     |                                                                                                                                                                                                                                                                                                                                                                                |          |    |
| 18 | Sample size          | 14  | Estimated number of participants needed to achieve study objectives and how it was determined, including clinical and statistical assumptions supporting any sample size calculations                                                                                                                                                                                          | 13       | 11 |
| 19 |                      |     |                                                                                                                                                                                                                                                                                                                                                                                |          |    |
| 20 |                      |     |                                                                                                                                                                                                                                                                                                                                                                                |          |    |
| 21 | Recruitment          | 15  | Strategies for achieving adequate participant enrolment to reach target sample size                                                                                                                                                                                                                                                                                            | 6        | 10 |
| 22 |                      |     |                                                                                                                                                                                                                                                                                                                                                                                |          |    |

### Methods: Assignment of interventions (for controlled trials)

#### Allocation:

|    |                                  |     |                                                                                                                                                                                                                                                                                                                                                          |                  |    |
|----|----------------------------------|-----|----------------------------------------------------------------------------------------------------------------------------------------------------------------------------------------------------------------------------------------------------------------------------------------------------------------------------------------------------------|------------------|----|
| 25 |                                  |     |                                                                                                                                                                                                                                                                                                                                                          |                  |    |
| 26 |                                  |     |                                                                                                                                                                                                                                                                                                                                                          |                  |    |
| 27 | Sequence generation              | 16a | Method of generating the allocation sequence (eg, computer-generated random numbers), and list of any factors for stratification. To reduce predictability of a random sequence, details of any planned restriction (eg, blocking) should be provided in a separate document that is unavailable to those who enrol participants or assign interventions | 9                | 25 |
| 28 |                                  |     |                                                                                                                                                                                                                                                                                                                                                          |                  |    |
| 29 |                                  |     |                                                                                                                                                                                                                                                                                                                                                          |                  |    |
| 30 |                                  |     |                                                                                                                                                                                                                                                                                                                                                          |                  |    |
| 31 |                                  |     |                                                                                                                                                                                                                                                                                                                                                          |                  |    |
| 32 |                                  |     |                                                                                                                                                                                                                                                                                                                                                          |                  |    |
| 33 | Allocation concealment mechanism | 16b | Mechanism of implementing the allocation sequence (eg, central telephone; sequentially numbered, opaque, sealed envelopes), describing any steps to conceal the sequence until interventions are assigned                                                                                                                                                | 9                | 25 |
| 34 |                                  |     |                                                                                                                                                                                                                                                                                                                                                          |                  |    |
| 35 |                                  |     |                                                                                                                                                                                                                                                                                                                                                          |                  |    |
| 36 |                                  |     |                                                                                                                                                                                                                                                                                                                                                          |                  |    |
| 37 | Implementation                   | 16c | Who will generate the allocation sequence, who will enrol participants, and who will assign participants to interventions                                                                                                                                                                                                                                | In full protocol |    |
| 38 |                                  |     |                                                                                                                                                                                                                                                                                                                                                          |                  |    |
| 39 |                                  |     |                                                                                                                                                                                                                                                                                                                                                          |                  |    |
| 40 |                                  |     |                                                                                                                                                                                                                                                                                                                                                          |                  |    |
| 41 |                                  |     |                                                                                                                                                                                                                                                                                                                                                          |                  |    |
| 42 |                                  |     |                                                                                                                                                                                                                                                                                                                                                          |                  |    |

NITRATE-TOD SPIRIT checklist V2.0 11/11/2019

|   |                    |     |                                                                                                                                                      |   |    |
|---|--------------------|-----|------------------------------------------------------------------------------------------------------------------------------------------------------|---|----|
| 1 |                    |     |                                                                                                                                                      |   |    |
| 2 |                    |     |                                                                                                                                                      |   |    |
| 3 |                    |     |                                                                                                                                                      |   |    |
| 4 | Blinding (masking) | 17a | Who will be blinded after assignment to interventions (eg, trial participants, care providers, outcome assessors, data analysts), and how            | 9 | 5  |
| 5 |                    |     |                                                                                                                                                      |   |    |
| 6 |                    |     |                                                                                                                                                      |   |    |
| 7 |                    | 17b | If blinded, circumstances under which unblinding is permissible, and procedure for revealing a participant's allocated intervention during the trial | 9 | 25 |
| 8 |                    |     |                                                                                                                                                      |   |    |
| 9 |                    |     |                                                                                                                                                      |   |    |

### Methods: Data collection, management, and analysis

|    |                         |     |                                                                                                                                                                                                                                                                                                                                                                                                              |         |          |
|----|-------------------------|-----|--------------------------------------------------------------------------------------------------------------------------------------------------------------------------------------------------------------------------------------------------------------------------------------------------------------------------------------------------------------------------------------------------------------|---------|----------|
| 10 |                         |     |                                                                                                                                                                                                                                                                                                                                                                                                              |         |          |
| 11 |                         |     |                                                                                                                                                                                                                                                                                                                                                                                                              |         |          |
| 12 | Data collection methods | 18a | Plans for assessment and collection of outcome, baseline, and other trial data, including any related processes to promote data quality (eg, duplicate measurements, training of assessors) and a description of study instruments (eg, questionnaires, laboratory tests) along with their reliability and validity, if known. Reference to where data collection forms can be found, if not in the protocol | 10      | 11       |
| 13 |                         |     |                                                                                                                                                                                                                                                                                                                                                                                                              |         |          |
| 14 |                         |     |                                                                                                                                                                                                                                                                                                                                                                                                              |         |          |
| 15 |                         |     |                                                                                                                                                                                                                                                                                                                                                                                                              |         |          |
| 16 |                         |     |                                                                                                                                                                                                                                                                                                                                                                                                              |         |          |
| 17 |                         |     |                                                                                                                                                                                                                                                                                                                                                                                                              |         |          |
| 18 |                         | 18b | Plans to promote participant retention and complete follow-up, including list of any outcome data to be collected for participants who discontinue or deviate from intervention protocols                                                                                                                                                                                                                    | 14      | 32       |
| 19 |                         |     |                                                                                                                                                                                                                                                                                                                                                                                                              |         |          |
| 20 |                         |     |                                                                                                                                                                                                                                                                                                                                                                                                              |         |          |
| 21 | Data management         | 19  | Plans for data entry, coding, security, and storage, including any related processes to promote data quality (eg, double data entry; range checks for data values). Reference to where details of data management procedures can be found, if not in the protocol                                                                                                                                            | In full | protocol |
| 22 |                         |     |                                                                                                                                                                                                                                                                                                                                                                                                              |         |          |
| 23 |                         |     |                                                                                                                                                                                                                                                                                                                                                                                                              |         |          |
| 24 |                         |     |                                                                                                                                                                                                                                                                                                                                                                                                              |         |          |
| 25 | Statistical methods     | 20a | Statistical methods for analysing primary and secondary outcomes. Reference to where other details of the statistical analysis plan can be found, if not in the protocol                                                                                                                                                                                                                                     | 13      | 9        |
| 26 |                         |     |                                                                                                                                                                                                                                                                                                                                                                                                              |         |          |
| 27 |                         |     |                                                                                                                                                                                                                                                                                                                                                                                                              |         |          |
| 28 |                         |     |                                                                                                                                                                                                                                                                                                                                                                                                              |         |          |
| 29 |                         | 20b | Methods for any additional analyses (eg, subgroup and adjusted analyses)                                                                                                                                                                                                                                                                                                                                     | 13      | 9        |
| 30 |                         |     |                                                                                                                                                                                                                                                                                                                                                                                                              |         |          |
| 31 |                         | 20c | Definition of analysis population relating to protocol non-adherence (eg, as randomised analysis), and any statistical methods to handle missing data (eg, multiple imputation)                                                                                                                                                                                                                              | 13      | 9        |
| 32 |                         |     |                                                                                                                                                                                                                                                                                                                                                                                                              |         |          |
| 33 |                         |     |                                                                                                                                                                                                                                                                                                                                                                                                              |         |          |

### Methods: Monitoring

NITRATE-TOD SPIRIT checklist V2.0 11/11/2019

|    |                                 |     |                                                                                                                                                                                                                                                                                                                                       |         |          |
|----|---------------------------------|-----|---------------------------------------------------------------------------------------------------------------------------------------------------------------------------------------------------------------------------------------------------------------------------------------------------------------------------------------|---------|----------|
| 1  |                                 |     |                                                                                                                                                                                                                                                                                                                                       |         |          |
| 2  |                                 |     |                                                                                                                                                                                                                                                                                                                                       |         |          |
| 3  |                                 |     |                                                                                                                                                                                                                                                                                                                                       |         |          |
| 4  | Data monitoring                 | 21a | Composition of data monitoring committee (DMC); summary of its role and reporting structure; statement of whether it is independent from the sponsor and competing interests; and reference to where further details about its charter can be found, if not in the protocol. Alternatively, an explanation of why a DMC is not needed | 16      | 9        |
| 5  |                                 |     |                                                                                                                                                                                                                                                                                                                                       |         |          |
| 6  |                                 |     |                                                                                                                                                                                                                                                                                                                                       |         |          |
| 7  |                                 |     |                                                                                                                                                                                                                                                                                                                                       |         |          |
| 8  |                                 |     |                                                                                                                                                                                                                                                                                                                                       |         |          |
| 9  |                                 | 21b | Description of any interim analyses and stopping guidelines, including who will have access to these interim results and make the final decision to terminate the trial                                                                                                                                                               | In full | protocol |
| 10 |                                 |     |                                                                                                                                                                                                                                                                                                                                       |         |          |
| 11 |                                 |     |                                                                                                                                                                                                                                                                                                                                       |         |          |
| 12 | Harms                           | 22  | Plans for collecting, assessing, reporting, and managing solicited and spontaneously reported adverse events and other unintended effects of trial interventions or trial conduct                                                                                                                                                     | 15      | 20       |
| 13 |                                 |     |                                                                                                                                                                                                                                                                                                                                       |         |          |
| 14 |                                 |     |                                                                                                                                                                                                                                                                                                                                       |         |          |
| 15 |                                 |     |                                                                                                                                                                                                                                                                                                                                       |         |          |
| 16 | Auditing                        | 23  | Frequency and procedures for auditing trial conduct, if any, and whether the process will be independent from investigators and the sponsor                                                                                                                                                                                           | In full | protocol |
| 17 |                                 |     |                                                                                                                                                                                                                                                                                                                                       |         |          |
| 18 |                                 |     |                                                                                                                                                                                                                                                                                                                                       |         |          |
| 19 |                                 |     |                                                                                                                                                                                                                                                                                                                                       |         |          |
| 20 | <b>Ethics and dissemination</b> |     |                                                                                                                                                                                                                                                                                                                                       |         |          |
| 21 | Research ethics approval        | 24  | Plans for seeking research ethics committee/institutional review board (REC/IRB) approval                                                                                                                                                                                                                                             | 15      | 4        |
| 22 |                                 |     |                                                                                                                                                                                                                                                                                                                                       |         |          |
| 23 |                                 |     |                                                                                                                                                                                                                                                                                                                                       |         |          |
| 24 | Protocol amendments             | 25  | Plans for communicating important protocol modifications (eg, changes to eligibility criteria, outcomes, analyses) to relevant parties (eg, investigators, REC/IRBs, trial participants, trial registries, journals, regulators)                                                                                                      | In full | protocol |
| 25 |                                 |     |                                                                                                                                                                                                                                                                                                                                       |         |          |
| 26 |                                 |     |                                                                                                                                                                                                                                                                                                                                       |         |          |
| 27 |                                 |     |                                                                                                                                                                                                                                                                                                                                       |         |          |
| 28 |                                 |     |                                                                                                                                                                                                                                                                                                                                       |         |          |
| 29 | Consent or assent               | 26a | Who will obtain informed consent or assent from potential trial participants or authorised surrogates, and how (see Item 32)                                                                                                                                                                                                          | In full | protocol |
| 30 |                                 |     |                                                                                                                                                                                                                                                                                                                                       |         |          |
| 31 |                                 |     |                                                                                                                                                                                                                                                                                                                                       |         |          |
| 32 |                                 | 26b | Additional consent provisions for collection and use of participant data and biological specimens in ancillary studies, if applicable                                                                                                                                                                                                 | NA      |          |
| 33 |                                 |     |                                                                                                                                                                                                                                                                                                                                       |         |          |
| 34 |                                 |     |                                                                                                                                                                                                                                                                                                                                       |         |          |
| 35 | Confidentiality                 | 27  | How personal information about potential and enrolled participants will be collected, shared, and maintained in order to protect confidentiality before, during, and after the trial                                                                                                                                                  | In full | protocol |
| 36 |                                 |     |                                                                                                                                                                                                                                                                                                                                       |         |          |
| 37 |                                 |     |                                                                                                                                                                                                                                                                                                                                       |         |          |
| 38 |                                 |     |                                                                                                                                                                                                                                                                                                                                       |         |          |
| 39 |                                 |     |                                                                                                                                                                                                                                                                                                                                       |         |          |
| 40 |                                 |     |                                                                                                                                                                                                                                                                                                                                       |         |          |
| 41 |                                 |     |                                                                                                                                                                                                                                                                                                                                       |         |          |
| 42 |                                 |     |                                                                                                                                                                                                                                                                                                                                       |         |          |
| 43 |                                 |     |                                                                                                                                                                                                                                                                                                                                       |         |          |
| 44 |                                 |     |                                                                                                                                                                                                                                                                                                                                       |         |          |
| 45 |                                 |     |                                                                                                                                                                                                                                                                                                                                       |         |          |
| 46 |                                 |     |                                                                                                                                                                                                                                                                                                                                       |         |          |

|    |                     |     |                                                                                                            |            |    |
|----|---------------------|-----|------------------------------------------------------------------------------------------------------------|------------|----|
| 1  |                     |     |                                                                                                            |            |    |
| 2  |                     |     |                                                                                                            |            |    |
| 3  |                     |     |                                                                                                            |            |    |
| 4  | Declaration of      | 28  | Financial and other competing interests for principal investigators for the overall trial and each         | 17         | 11 |
| 5  | interests           |     | study site                                                                                                 |            |    |
| 6  |                     |     |                                                                                                            |            |    |
| 7  | Access to data      | 29  | Statement of who will have access to the final trial dataset, and disclosure of contractual                | In full    |    |
| 8  |                     |     | agreements that limit such access for investigators                                                        | protocol   |    |
| 9  |                     |     |                                                                                                            |            |    |
| 10 | Ancillary and post- | 30  | Provisions, if any, for ancillary and post-trial care, and for compensation to those who suffer harm       | In full    |    |
| 11 | trial care          |     | from trial participation                                                                                   | protocol   |    |
| 12 |                     |     |                                                                                                            |            |    |
| 13 | Dissemination       | 31a | Plans for investigators and sponsor to communicate trial results to participants, healthcare               | 16         | 18 |
| 14 | policy              |     | professionals, the public, and other relevant groups (eg, via publication, reporting in results            |            |    |
| 15 |                     |     | databases, or other data sharing arrangements), including any publication restrictions                     |            |    |
| 16 |                     |     |                                                                                                            |            |    |
| 17 |                     |     |                                                                                                            |            |    |
| 18 |                     | 31b | Authorship eligibility guidelines and any intended use of professional writers                             | 16         | 33 |
| 19 |                     |     |                                                                                                            |            |    |
| 20 |                     | 31c | Plans, if any, for granting public access to the full protocol, participant-level dataset, and statistical | NA         |    |
| 21 |                     |     | code                                                                                                       |            |    |
| 22 |                     |     |                                                                                                            |            |    |
| 23 | <b>Appendices</b>   |     |                                                                                                            |            |    |
| 24 |                     |     |                                                                                                            |            |    |
| 25 | Informed consent    | 32  | Model consent form and other related documentation given to participants and authorised                    | In         |    |
| 26 | materials           |     | surrogates                                                                                                 | Supplement |    |
| 27 |                     |     |                                                                                                            |            |    |
| 28 | Biological          | 33  | Plans for collection, laboratory evaluation, and storage of biological specimens for genetic or            | 10         | 11 |
| 29 | specimens           |     | molecular analysis in the current trial and for future use in ancillary studies, if applicable             |            |    |
| 30 |                     |     |                                                                                                            |            |    |

---

\*It is strongly recommended that this checklist be read in conjunction with the SPIRIT 2013 Explanation & Elaboration for important clarification on the items. Amendments to the protocol should be tracked and dated. The SPIRIT checklist is copyrighted by the SPIRIT Group under the Creative Commons "[Attribution-NonCommercial-NoDerivs 3.0 Unported](https://creativecommons.org/licenses/by-nc-nd/3.0/)" license.



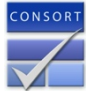

## CONSORT 2010 checklist of information to include when reporting a randomised trial\*

| Section/Topic                    | Item No | Checklist item                                                                                                                                                                              | Reported on page No |
|----------------------------------|---------|---------------------------------------------------------------------------------------------------------------------------------------------------------------------------------------------|---------------------|
| <b>Title and abstract</b>        |         |                                                                                                                                                                                             |                     |
|                                  | 1a      | Identification as a randomised trial in the title                                                                                                                                           | 1                   |
|                                  | 1b      | Structured summary of trial design, methods, results, and conclusions (for specific guidance see CONSORT for abstracts)                                                                     | 2                   |
| <b>Introduction</b>              |         |                                                                                                                                                                                             |                     |
| Background and objectives        | 2a      | Scientific background and explanation of rationale                                                                                                                                          | 4                   |
|                                  | 2b      | Specific objectives or hypotheses                                                                                                                                                           | 6                   |
| <b>Methods</b>                   |         |                                                                                                                                                                                             |                     |
| Trial design                     | 3a      | Description of trial design (such as parallel, factorial) including allocation ratio                                                                                                        | 9                   |
|                                  | 3b      | Important changes to methods after trial commencement (such as eligibility criteria), with reasons                                                                                          | 7                   |
| Participants                     | 4a      | Eligibility criteria for participants                                                                                                                                                       | 7                   |
|                                  | 4b      | Settings and locations where the data were collected                                                                                                                                        | 9                   |
| Interventions                    | 5       | The interventions for each group with sufficient details to allow replication, including how and when they were actually administered                                                       | 9                   |
| Outcomes                         | 6a      | Completely defined pre-specified primary and secondary outcome measures, including how and when they were assessed                                                                          | 6                   |
|                                  | 6b      | Any changes to trial outcomes after the trial commenced, with reasons                                                                                                                       | NA                  |
| Sample size                      | 7a      | How sample size was determined                                                                                                                                                              | 13                  |
|                                  | 7b      | When applicable, explanation of any interim analyses and stopping guidelines                                                                                                                | NA                  |
| <b>Randomisation:</b>            |         |                                                                                                                                                                                             |                     |
| Sequence generation              | 8a      | Method used to generate the random allocation sequence                                                                                                                                      | 9                   |
|                                  | 8b      | Type of randomisation; details of any restriction (such as blocking and block size)                                                                                                         | 9                   |
| Allocation concealment mechanism | 9       | Mechanism used to implement the random allocation sequence (such as sequentially numbered containers), describing any steps taken to conceal the sequence until interventions were assigned | 9                   |
| Implementation                   | 10      | Who generated the random allocation sequence, who enrolled participants, and who assigned participants to interventions                                                                     | 9                   |
| Blinding                         | 11a     | If done, who was blinded after assignment to interventions (for example, participants, care providers, those                                                                                | 9                   |

|    |                          |                                                             |                                                                                                                  |
|----|--------------------------|-------------------------------------------------------------|------------------------------------------------------------------------------------------------------------------|
| 1  |                          | assessing outcomes) and how                                 |                                                                                                                  |
| 2  | 11b                      | If relevant, description of the similarity of interventions | 9                                                                                                                |
| 3  | Statistical methods      | 12a                                                         | Statistical methods used to compare groups for primary and secondary outcomes                                    |
| 4  |                          | 12b                                                         | Methods for additional analyses, such as subgroup analyses and adjusted analyses                                 |
| 5  |                          |                                                             | 14                                                                                                               |
| 6  | <b>Results</b>           |                                                             |                                                                                                                  |
| 7  | Participant flow (a      | 13a                                                         | For each group, the numbers of participants who were randomly assigned, received intended treatment, and         |
| 8  | diagram is strongly      |                                                             | were analysed for the primary outcome                                                                            |
| 9  | recommended)             | 13b                                                         | For each group, losses and exclusions after randomisation, together with reasons                                 |
| 10 | Recruitment              | 14a                                                         | Dates defining the periods of recruitment and follow-up                                                          |
| 11 |                          | 14b                                                         | Why the trial ended or was stopped                                                                               |
| 12 | Baseline data            | 15                                                          | A table showing baseline demographic and clinical characteristics for each group                                 |
| 13 | Numbers analysed         | 16                                                          | For each group, number of participants (denominator) included in each analysis and whether the analysis was      |
| 14 |                          |                                                             | by original assigned groups                                                                                      |
| 15 | Outcomes and             | 17a                                                         | For each primary and secondary outcome, results for each group, and the estimated effect size and its            |
| 16 | estimation               |                                                             | precision (such as 95% confidence interval)                                                                      |
| 17 |                          | 17b                                                         | For binary outcomes, presentation of both absolute and relative effect sizes is recommended                      |
| 18 | Ancillary analyses       | 18                                                          | Results of any other analyses performed, including subgroup analyses and adjusted analyses, distinguishing       |
| 19 |                          |                                                             | pre-specified from exploratory                                                                                   |
| 20 | Harms                    | 19                                                          | All important harms or unintended effects in each group (for specific guidance see CONSORT for harms)            |
| 21 |                          |                                                             | NA                                                                                                               |
| 22 | <b>Discussion</b>        |                                                             |                                                                                                                  |
| 23 | Limitations              | 20                                                          | Trial limitations, addressing sources of potential bias, imprecision, and, if relevant, multiplicity of analyses |
| 24 | Generalisability         | 21                                                          | Generalisability (external validity, applicability) of the trial findings                                        |
| 25 | Interpretation           | 22                                                          | Interpretation consistent with results, balancing benefits and harms, and considering other relevant evidence    |
| 26 |                          |                                                             | NA                                                                                                               |
| 27 | <b>Other information</b> |                                                             |                                                                                                                  |
| 28 | Registration             | 23                                                          | Registration number and name of trial registry                                                                   |
| 29 | Protocol                 | 24                                                          | Where the full trial protocol can be accessed, if available                                                      |
| 30 | Funding                  | 25                                                          | Sources of funding and other support (such as supply of drugs), role of funders                                  |
| 31 |                          |                                                             | 16                                                                                                               |
| 32 |                          |                                                             | 16                                                                                                               |
| 33 |                          |                                                             | 17                                                                                                               |

36  
37 \*We strongly recommend reading this statement in conjunction with the CONSORT 2010 Explanation and Elaboration for important clarifications on all the items. If relevant, we also  
38 recommend reading CONSORT extensions for cluster randomised trials, non-inferiority and equivalence trials, non-pharmacological treatments, herbal interventions, and pragmatic trials.  
39 Additional extensions are forthcoming: for those and for up to date references relevant to this checklist, see [www.consort-statement.org](http://www.consort-statement.org).  
40  
41  
42

# BMJ Open

## RANDOMISED, DOUBLE-BLIND, PLACEBO-CONTROLLED CLINICAL TRIAL INVESTIGATING THE EFFECTS OF INORGANIC NITRATE IN HYPERTENSION-INDUCED TARGET ORGAN DAMAGE: PROTOCOL OF THE NITRATE-TOD STUDY IN THE UK

|                                 |                                                                                                                                                                                                                                                                                                                                                                                                                                                                                                                                                                                                                                                                                                                                                                                                                                                                                                                                                                                                                                                                                                                                                                                                                                                                                                                                                                                                                                                                                                                                                                                                                                                                                                                                                                                                                                       |
|---------------------------------|---------------------------------------------------------------------------------------------------------------------------------------------------------------------------------------------------------------------------------------------------------------------------------------------------------------------------------------------------------------------------------------------------------------------------------------------------------------------------------------------------------------------------------------------------------------------------------------------------------------------------------------------------------------------------------------------------------------------------------------------------------------------------------------------------------------------------------------------------------------------------------------------------------------------------------------------------------------------------------------------------------------------------------------------------------------------------------------------------------------------------------------------------------------------------------------------------------------------------------------------------------------------------------------------------------------------------------------------------------------------------------------------------------------------------------------------------------------------------------------------------------------------------------------------------------------------------------------------------------------------------------------------------------------------------------------------------------------------------------------------------------------------------------------------------------------------------------------|
| Journal:                        | <i>BMJ Open</i>                                                                                                                                                                                                                                                                                                                                                                                                                                                                                                                                                                                                                                                                                                                                                                                                                                                                                                                                                                                                                                                                                                                                                                                                                                                                                                                                                                                                                                                                                                                                                                                                                                                                                                                                                                                                                       |
| Manuscript ID                   | bmjopen-2019-034399.R2                                                                                                                                                                                                                                                                                                                                                                                                                                                                                                                                                                                                                                                                                                                                                                                                                                                                                                                                                                                                                                                                                                                                                                                                                                                                                                                                                                                                                                                                                                                                                                                                                                                                                                                                                                                                                |
| Article Type:                   | Protocol                                                                                                                                                                                                                                                                                                                                                                                                                                                                                                                                                                                                                                                                                                                                                                                                                                                                                                                                                                                                                                                                                                                                                                                                                                                                                                                                                                                                                                                                                                                                                                                                                                                                                                                                                                                                                              |
| Date Submitted by the Author:   | 20-Nov-2019                                                                                                                                                                                                                                                                                                                                                                                                                                                                                                                                                                                                                                                                                                                                                                                                                                                                                                                                                                                                                                                                                                                                                                                                                                                                                                                                                                                                                                                                                                                                                                                                                                                                                                                                                                                                                           |
| Complete List of Authors:       | Lau, Clement; William Harvey Research Institute, Barts NIHR Cardiovascular Biomedical Research Unit, Centre of Clinical Pharmacology, Queen Mary University of London; Barts Health NHS Trust<br>Hamers, Alexander Jozua Pedro ; William Harvey Research Institute, Barts NIHR Cardiovascular Biomedical Research Unit, Centre of Clinical Pharmacology, Queen Mary University of London<br>Rathod, Krishnaraj; William Harvey Research Institute, Barts NIHR Cardiovascular Biomedical Research Unit, Centre of Clinical Pharmacology, Queen Mary University of London; Barts Health NHS Trust<br>Shabbir, Asad; William Harvey Research Institute, Barts NIHR Cardiovascular Biomedical Research Unit, Centre of Clinical Pharmacology, Queen Mary University of London<br>Cooper, Jackie; William Harvey Research Institute, Barts NIHR Cardiovascular Biomedical Research Unit, Centre of Clinical Pharmacology, Queen Mary University of London<br>Primus, Christopher; William Harvey Research Institute, Barts NIHR Cardiovascular Biomedical Research Unit, Centre of Clinical Pharmacology, Queen Mary University of London; Barts Health NHS Trust<br>Davies, Ceri; William Harvey Research Institute; Barts Health NHS Trust<br>Mathur, Anthony; William Harvey Research Institute; Barts Health NHS Trust<br>Moon, James; UCL Institute of Cardiovascular Science, University College London, Gower Street, London; Barts Health NHS Trust<br>Kapil, Vikas; William Harvey Research Institute, Barts NIHR Cardiovascular Biomedical Research Unit, Centre of Clinical Pharmacology, Queen Mary University of London; Barts Health NHS Trust<br>Ahluwalia, Amrita; William Harvey Research Institute, Barts NIHR Cardiovascular Biomedical Research Unit, Centre of Clinical Pharmacology, Queen Mary University of London |
| <b>Primary Subject Heading</b>: | Cardiovascular medicine                                                                                                                                                                                                                                                                                                                                                                                                                                                                                                                                                                                                                                                                                                                                                                                                                                                                                                                                                                                                                                                                                                                                                                                                                                                                                                                                                                                                                                                                                                                                                                                                                                                                                                                                                                                                               |
| Secondary Subject Heading:      | Pharmacology and therapeutics                                                                                                                                                                                                                                                                                                                                                                                                                                                                                                                                                                                                                                                                                                                                                                                                                                                                                                                                                                                                                                                                                                                                                                                                                                                                                                                                                                                                                                                                                                                                                                                                                                                                                                                                                                                                         |
| Keywords:                       | Hypertension < RADIOLOGY, Cardiovascular imaging < RADIOLOGY & IMAGING, CLINICAL PHARMACOLOGY, Clinical trials < THERAPEUTICS                                                                                                                                                                                                                                                                                                                                                                                                                                                                                                                                                                                                                                                                                                                                                                                                                                                                                                                                                                                                                                                                                                                                                                                                                                                                                                                                                                                                                                                                                                                                                                                                                                                                                                         |

1  
2  
3  
4  
5  
6  
7  
8  
9  
10  
11  
12  
13  
14  
15  
16  
17  
18  
19  
20  
21  
22  
23  
24  
25  
26  
27  
28  
29  
30  
31  
32  
33  
34  
35  
36  
37  
38  
39  
40  
41  
42  
43  
44  
45  
46  
47  
48  
49  
50  
51  
52  
53  
54  
55  
56  
57  
58  
59  
60



SCHOLARONE™  
Manuscripts

1  
2  
3 **RANDOMISED, DOUBLE-BLIND, PLACEBO-CONTROLLED CLINICAL TRIAL INVESTIGATING THE**  
4 **EFFECTS OF INORGANIC NITRATE IN HYPERTENSION-INDUCED TARGET ORGAN DAMAGE:**  
5 **PROTOCOL OF THE NITRATE-TOD STUDY IN THE UK**  
6  
7

8  
9  
10 Lau CWZ<sup>1</sup>, Hamers AJP<sup>1</sup>, Rathod KS<sup>1</sup>, Shabbir A<sup>1</sup>, Cooper J<sup>1</sup>, Primus C<sup>1</sup>, Davies C<sup>1</sup>, Mathur A<sup>1</sup>, Moon JC<sup>2</sup>,  
11 Kapil V<sup>1,3</sup>, Ahluwalia A<sup>1</sup>  
12  
13

14  
15 <sup>1</sup>William Harvey Research Institute, Barts and the London School of Medicine and Dentistry, Queen  
16 Mary University of London, London, United Kingdom.

17  
18 <sup>2</sup>Institute of Cardiovascular Science, University College London, London, United Kingdom; Barts Heart  
19 Centre, West Smithfield, London, United Kingdom.

20  
21 <sup>3</sup>Barts BP Centre of Excellence, Barts Heart Centre, Barts Health NHS Trust, London, United Kingdom.  
22  
23

24  
25 **Corresponding author:**

26 Professor Amrita Ahluwalia

27 William Harvey Research Institute

28 Barts and The London School of Medicine and Dentistry

29 Queen Mary University of London

30 Charterhouse Square

31 London, EC1M 6BQ

32 United Kingdom

33 Tel: +44 207 882 8377

34 Email: [a.ahluwalia@qmul.ac.uk](mailto:a.ahluwalia@qmul.ac.uk)  
35  
36  
37  
38  
39  
40  
41  
42  
43  
44  
45  
46  
47  
48  
49  
50  
51  
52  
53  
54  
55  
56  
57  
58  
59  
60

Word count: 4,720

## **ABSTRACT**

### **Introduction**

Arterial stiffness and left ventricular hypertrophy (LVH) are key markers of hypertensive target organ damage (TOD) associated with increased cardiovascular morbidity and mortality. We have previously shown that dietary inorganic nitrate supplementation lowers blood pressure (BP) in hypertension, however, whether this approach might also improve markers of hypertensive TOD is unknown. In this study, we will investigate whether daily dietary inorganic nitrate administration reduces left ventricular (LV) mass and improves measures of arterial stiffness.

### **Methods and Design**

NITRATE-TOD is a double-blind, randomised, single-centre, placebo-controlled phase II trial aiming to enrol 160 patients with suboptimal BP control on 1 or more anti-hypertensives. Patients will be randomised to receive 4-month once daily dose of either nitrate-rich beetroot juice or nitrate-deplete beetroot juice (placebo). The primary outcomes are reduction in LV mass and reduction in pulse wave velocity (PWV) and central blood pressure (CBP).

The study has a power of 95% for detecting a 9g LV mass change by cardiovascular magnetic resonance (CMR) imaging (~6% change for a mildly hypertrophied heart of 150g). For PWV we have a power of > 95% for detecting a 0.6 m/s absolute change. For central systolic BP, we have a > 90% power to detect a 5.8 mm Hg difference in central systolic BP.

Secondary end-points include change in ultrasound flow mediated dilatation (FMD), change in plasma nitrate and nitrite concentration and change in BP.

### **Ethics and Dissemination**

The study was approved by the London – City and East Research Ethics Committee (10/H0703/98). Trial results will be published according to the CONSORT statement and will be presented at conferences and reported in peer-reviewed journals.

ClinicalTrials.gov identifier: NCT03088514

### **Strengths and limitations of this study**

- This is a randomised, placebo-controlled double-blind clinical trial assessing the potential of dietary nitrate in reducing both cardiac and vascular damage due to persistently elevated blood pressure.
- Dietary nitrate is a simple, easy to use and safe intervention that may be more acceptable to patients on long term medication for their blood pressure.
- This is a single-centre phase II study; therefore, the applicability to other centres is uncertain.

For peer review only

## INTRODUCTION

Hypertension is the leading risk factor for cardiovascular diseases (CVD) worldwide.[1,2] In 2016, an estimated 17.9 million people died from CVDs, which represents 31% of all global deaths.[3] Approximately half of these deaths were caused by complications from hypertension.[4] Hence, novel and cost-effective therapeutic strategies continue to be sought. In this regard there has been a major emphasis to increase vegetable intake since increased consumption of a vegetable-rich diet particularly green leafy vegetables confers protection against CVD, including the lowering of BP[5,6]. One particular constituent of such vegetables that has been proposed to underlie the beneficial effects of this food group is inorganic nitrate; through bioconversion to nitrite, and then nitrite to nitric oxide (NO)[7] in the body. Importantly, provision of inorganic nitrate to hypertensive patients causes a rise in plasma nitrate and is associated with a decrease in BP.[8,9]

Dietary inorganic nitrate once ingested rapidly enters the circulation[8–10] with a proportion of this nitrate being extracted and then secreted and concentrated in the saliva.[11] Bacteria residing in the oral cavity convert this nitrate to nitrite which is then swallowed;[12] appearing soon after within the circulation. We have recently shown that daily supplementation with dietary nitrate (providing approximately 6.4 mmol nitrate daily) for 4 weeks was associated with robust, sustained and clinically meaningful reductions in BP (measured by clinic, ambulatory and home methods) of ~8/4 mm Hg.[13] However, persistent hypertension leads to both vascular and cardiac remodelling and whether inorganic nitrate-induced reductions in BP might be associated with improvements in either of these in the long term is unknown. Experimentally in patients one can assess this potential through the measurement of arterial stiffness and LV mass respectively, with increases of either conferring increased CV risk. Arterial stiffness (and its inverse measure, distensibility) refers to the decreased elasticity that develops in arteries as a consequence of vascular remodelling resulting from alterations of the fibrous components of the extracellular matrix (including elastin and collagen).[14] Importantly, increased arterial stiffness, as measured using carotid-femoral PWV,[15] is a strong predictor of CV events,[16] and there have been suggestions that drug development targeting this phenomenon is likely to provide a new genre of therapeutics in the combat against CVD.[17] Additionally, an increased central pulse pressure occurs when the large conduit blood vessels lose their elasticity and become less able to accommodate all of the blood ejected from the heart. This increase in pressure results in an increase in central systolic BP and causes an increase in the stress imposed on the left ventricle, which in turn can result in left ventricular hypertrophy (LVH).[18] Elevated LV mass is an initial compensatory mechanism to normalise wall stress due to elevated BP.



1  
2  
3 However, this cardiac remodelling eventually becomes maladaptive with an increase in myocardial  
4 oxygen consumption, cardiac chamber dilation, reduced LV contractility and progressive deterioration  
5 to heart failure.[19] The measure of LVH as a prognostic indicator of adverse outcome was first  
6 convincingly identified in the Framingham study,[20] and numerous studies since have confirmed the  
7 strong relationship between LVH and CV events and mortality.[21,22] Perhaps, more importantly, LV  
8 mass reduction is associated with further improvements in CV outcomes.[23,24]  
9

10  
11  
12  
13  
14  
15 It has been proposed that insufficient supply of endogenous NO likely contributes to the progression  
16 and worsening of arterial stiffness and LVH.[25] Pre-clinical studies have demonstrated that an  
17 elevation of systemic nitrite levels reduces cardiac hypertrophy in mice.[26] Moreover, administration  
18 of inorganic nitrate reduces PWV healthy volunteers and hypertensive patients in short term  
19 studies.[13,27] It is also possible that decreasing arterial stiffness improves ventricular-arterial  
20 coupling which might result in benefits in cardiac function.[28]  
21  
22  
23  
24  
25

26  
27 The objective of this study is to determine whether a dietary nitrate intervention might elevate the  
28 levels of NO in the body sufficiently to alter both heart and blood vessel remodelling in hypertensive  
29 patients with suboptimal BP control.  
30  
31  
32  
33  
34  
35  
36  
37  
38  
39  
40  
41  
42  
43  
44  
45  
46  
47  
48  
49  
50  
51  
52  
53  
54  
55  
56  
57  
58  
59  
60

## **METHODOLOGY**

### **Trial objectives**

*Aims of research:* We wish to test the hypothesis that dietary supplementation of inorganic nitrate (in beetroot juice) elevates circulating nitrate and nitrite levels ultimately delivering NO to the vasculature and thereby improving endothelial, vascular and cardiac function in patients with treated yet uncontrolled hypertension. Specifically, the aim is to investigate whether prolonged dietary nitrate ingestion in hypertensive patients with suboptimal BP control, can cause reductions in LV mass and PWV.

### **Participant selection**

This is a single-centre study, in which patients will be identified and recruited at Barts Health NHS Trust. In addition, other participant identification centres will be used to identify suitable participants via the NIHR Clinical Research Network and local NHS Trusts.

### **Original hypothesis**

Dietary inorganic nitrate ingestion, in addition to existing pharmacological therapy, reduces BP leading to reductions in LV mass and arterial stiffness.

### **Primary end points**

The primary end points are change in LV mass, determined using cardiovascular magnetic resonance imaging (CMR) (NITRATE-LVH arm) and a change in central systolic BP and PWV (NITRATE-CBP arm).

### **Secondary end points**

Secondary endpoints are change in ultrasound determined brachial artery flow-mediated dilation (FMD), change in plasma nitrate and nitrite levels and a change in peripheral BP.

### **Exploratory end points**

Exploratory end points for cardiac imaging include a change in aortic distensibility, LV systolic and diastolic function, LV volumes and ejection fraction, left atrial volumes and function and markers of myocardial fibrosis and oedema. We will assess changes in 12-lead ECG parameters of LVH. With regards to BP, we will assess for changes in BP variability, BP control rate and BP circadian pattern. We will also perform analysis of the salivary microbiome. Finally, we will assess changes in quality of life score (EQ-5D questionnaire) and biochemical measures e.g. urine albumin excretion, cholesterol fractions, B-natriuretic peptide (BNP) and troponin T.

### Inclusion criteria

A subject will be eligible for inclusion in this study only if all of the following criteria apply:

1. Patients will be enrolled following an informed consent.
2. Aged 18-80 years.
3. The study subjects will be hypertensive with evidence of difficulty treating to target BP (daytime ABPM 135-170 and/or 85-105 mm Hg) on 1 or more antihypertensive agent, with insufficient efficacy or intolerance of medications.
4. For the NITRATE-LVH arm, echocardiographic evidence of LVH (LV mass indexed to body surface area (BSA); males > 115 g/m<sup>2</sup>; females > 95 g/m<sup>2</sup>).
5. Patients will have been established on an antihypertensive treatment regime for at least 1 month by the time of participation in the study and will not require changes in pharmacological intervention for the duration of the trial.

### Exclusion criteria

Unless specified, a subject will not be eligible for inclusion in this study if any of the following criteria apply:

1. History of chronic viral hepatitis (including presence of hepatitis B surface antigen or hepatitis C antibody), or other chronic hepatic disorders.
2. History of increased liver function tests (ALT, AST) due to acute or chronic liver conditions, 3x above the upper limit of normal or bilirubin 1.5x above the upper limit of normal at screening.
3. Renal impairment with creatinine clearance (eGFR) of < 50 ml/min at screening.
4. Patients with diabetes mellitus, defined by previous history of diabetes or HbA1c > 6.5% (> 48 mmol/mol) at screening.
5. Subjects with LDLc, > 7.5 mmol/l and/or triglyceride level > 10 mmol/l.
6. History of heart failure defined as NYHA class II - IV or those with known LV dysfunction (LV ejection fraction < 40%) regardless of symptomatic status.
7. History of malignancy within the past 5 years, other than non-melanoma skin cancer.
8. Current life-threatening condition other than vascular disease (e.g. very severe chronic airways disease, HIV positive, life-threatening arrhythmias) that may prevent a subject from completing the study.

- 1
- 2
- 3 9. Use of an investigational device or investigational drug within 30 days or 5 half-lives
- 4 (whichever is longer) preceding the first dose of study medication.
- 5
- 6 10. Subjects who will commence or who are likely to commence regular treatment with non-
- 7 steroidal anti-inflammatory drugs (NSAIDs) (other than aspirin), from screening until study
- 8 completion.
- 9
- 10 11. Any non-stable dosing of ongoing medication regimens throughout the study trial.
- 11
- 12 12. Drug abuse within the past 6 months.
- 13
- 14 13. The subject has a three-month prior history of regular alcohol consumption exceeding an
- 15 average weekly intake of > 28 units (or an average daily intake of greater than 3 units) for
- 16 males, or an average weekly intake of > 21 units (or an average daily intake of greater than 2
- 17 units) for females. 1 unit is equivalent to a half-pint (284mL) of beer/lager; 25mL measure of
- 18 spirits or 125mL of wine.
- 19
- 20 14. Any other subject whom the Investigator deems unsuitable for the study (e.g. due to other
- 21 medical reasons, laboratory abnormalities, expected study medication noncompliance, or
- 22 subject's unwillingness to comply with all study-related study procedures).
- 23
- 24 15. Subjects with rheumatoid arthritis, connective tissue disorders and other conditions known
- 25 to be associated with chronic inflammation (e.g. Inflammatory Bowel Disease).
- 26
- 27 16. Subjects with any acute infection, or recent systemic (oral or IV) antibiotics within 1 month of
- 28 screening, or significant trauma (burns, fractures).
- 29
- 30 17. Subjects who have donated more than 500 mL of blood within 56 days prior to the study
- 31 medication administration.
- 32
- 33 18. Self-reported use of anti-microbial mouthwash or tongue scrapes.
- 34
- 35 19. Concomitant xanthine oxidase inhibitors (such as allopurinol).
- 36
- 37 20. Known history of significant claustrophobia, previous intolerance of CMR imaging or known
- 38 (or suspected) incompatible metallic implant.
- 39
- 40 21. Pregnancy.
- 41
- 42 22. Allergy to gadolinium-based contrast agents used for CMR.
- 43
- 44 23. Patients with known LVH caused by another established pathology diagnosed prior to or at
- 45 screening e.g. severe aortic stenosis, hypertrophic cardiomyopathy, amyloidosis and Fabry
- 46 disease.
- 47
- 48
- 49
- 50
- 51
- 52
- 53
- 54

55 Exceptions to the exclusion criteria:

- 56
- 57 • For criteria 18, patients can enter the trial if they discontinue the use of anti-microbial
- 58 mouthwash for the duration of the clinical trial.
- 59
- 60

- Criteria 20 and 22 do not apply to participants who will not have a CMR scan in the NITRATE-CBP arm.

### **Study design and intervention**

This is a prospective double-blind, placebo-controlled, clinical study. A total of 160 patients (male and female, age 18–80) with hypertension as per requirements indicated above will be recruited. Figure 1 shows a summary of the study scheme. Patients will be stratified at screening into 2 arms. Participants with LVH at screening echocardiography will enter the NITRATE-LVH arm (n=80) whilst those who do not have LVH but satisfy the other eligibility criteria will enter the NITRATE-CBP arm (n=80). LVH is defined by increased LV mass determined by acquiring a parasternal long axis image and subsequently measured for the interventricular septal wall thickness, end-diastolic LV cavity diameter and posterior LV wall thickness according to published guidelines.[29] LV mass is calculated as previously described and indexed to body surface area (BSA).[30]

All visits will take place at the William Harvey Heart Centre, Queen Mary University of London and Barts Heart Centre, St Bartholomew's Hospital, Barts Health NHS Trust. Patients will be randomised to receive 70 mL of a beetroot juice concentrate containing ~6 mmol nitrate or nitrate-depleted placebo juice concentrate (James White Drinks, UK) control. The volunteers will start taking their daily dose after completion of their baseline visit (visit 1) for 16 weeks. Patients will be advised to take their dose of juice at the same time each day, preferably in the morning with their breakfast. Patients will be provided with dietary advice in relation to the calorific content of interventions (both ~100kcal). In addition to baseline and 16 week visits, patients will return to the clinic at 8 weeks for collection of samples for NOx analysis and for discussion of any adherence issues.

### **Randomisation and blinding process**

Patients will be block randomised on a 1:1 basis to receive either dietary nitrate or placebo, using a binary random number sequence (<http://www.random.org>). Treatment assignment for volunteers in the dietary nitrate and placebo groups will remain blinded until data lock and statistical analysis at the end of the study. If unblinding is required, the chief investigator for the study will be informed. A list of the unblinded treatments will be kept in a secure location at the Barts Cardiovascular Clinical Trials Unit (CVCTU). The unblinding procedure will be available at all times.

### **Patient and public involvement**

1  
2  
3 Patients were directly involved in the design and planning of the study. Twenty previous Barts Health  
4 NHS Trust patients were surveyed regarding aspects of trials involving dietary interventions, which  
5 informed this protocol.  
6  
7  
8  
9

### 10 **Study start and end dates**

11 Recruitment commenced on 23<sup>rd</sup> March 2017. The provisional end date for recruitment is September  
12 2020.  
13  
14  
15

### 16 **Methods to be used**

#### 17 **Blood, saliva and urine analysis**

18 In this study, venous blood will be taken using a 21-gauge butterfly needle at each visit. Blood samples  
19 will be centrifuged immediately and plasma separated. The plasma samples will be snap frozen in  
20 liquid nitrogen and stored at -80°C. These samples will be used for the purposes of making  
21 biochemical measurements and will be discarded once used. Similarly, saliva and urine will be  
22 collected at each visit. Saliva will be centrifuged, and a pellet generated. This pellet contains oral  
23 bacteria that have dislodged from the oral cavity. This pellet will be frozen for later analysis of oral  
24 bacteria by second-generation genome sequencing.  
25  
26  
27  
28  
29  
30  
31  
32

33 Nitrate and nitrite levels in saliva, blood and urine samples will be determined using ozone  
34 chemiluminescence as previously described.[31,32] In brief, total nitrate and nitrite concentration  
35 (termed 'NOx') will be determined by adding samples to 0.1mol/L vanadium (III) chloride in 1M  
36 hydrochloric acid refluxing at 95°C under nitrogen. Nitrite concentration will be determined by the  
37 addition of samples to 0.09 mol/L potassium iodide in glacial acetic acid under nitrogen at room  
38 temperature. Nitrate concentration will be calculated by the subtraction of [nitrite] from [NOx]. All  
39 measurements will be conducted by an individual blinded to the intervention. In addition, a sample  
40 from each batch of juice sent to each volunteer will be analysed for NOx content.  
41  
42  
43  
44  
45  
46  
47  
48

#### 49 **Pulse wave analysis and pulse wave velocity**

50 Pulse wave analysis (PWA) and PWV are measures of arterial stiffness, which will be determined by a  
51 non-invasive Vicorder device (Skidmore Medical Limited, Bristol, UK). For PWA, the pulse wave will  
52 be recorded from the brachial cuff applied to the non-dominant arm. For PWV, the pulse wave will be  
53 simultaneously recorded from the carotid and femoral site using an oscillometric method. A small,  
54 inflatable neck pad will be placed directly over a carotid artery and secured around the neck by a  
55 Velcro tab and a cuff will also be placed around the patient's ipsilateral upper thigh. Both carotid and  
56  
57  
58  
59  
60

1  
2  
3 femoral cuffs will be simultaneously inflated automatically to 65 mm Hg and the corresponding  
4 oscillometric signal from each cuff digitally analysed to extract the pulse time delay. To estimate the  
5 aortic length, the distance between the sternal notch and the thigh cuff will be measured. From these  
6 measurements, PWV can be derived as  $PWV = \text{aortic distance}/\text{pulse time delay}$ . [33]  
7  
8  
9

### 10 11 **Flow-mediated dilation**

12 FMD will be used to non-invasively assess endothelial function, using vascular ultrasound to measure  
13 the increase in brachial artery diameter in response to increased flow [34] as previously described. [35]  
14 A high-resolution external vascular ultrasound Siemens/Acuson Sequoia C256 Colour Doppler with a  
15 7.0-MHz linear-array transducer supported by a stereotactic clamp will be used to assess the vessel  
16 diameter in the right arm. The vessel will be scanned in longitudinal section and the centre will be  
17 identified when the clearest views of the anterior and posterior artery walls have been obtained.  
18 Images will be magnified with a resolution box function and images of the brachial artery acquired  
19 continuously using semi-automated edge detection software (FMD Studio, Quipu s.r.l, Pisa, Italy) and  
20 analysed in real time. An automatic mathematical contour tracking operator locates the pulsed-wave  
21 Doppler of the brachial artery which will be used to measure the diameter and blood flow velocity  
22 continuously for 1 minute at baseline, then during 5 minutes of reduced blood flow (induced by  
23 inflation to 300 mm Hg of a pneumatic cuff placed on the right forearm site distal to the segment of  
24 artery being analysed), and finally for a further 5 minutes during reactive hyperaemia following cuff  
25 release. FMD is defined as the maximum percentage increase in vessel diameter during reactive  
26 hyperaemia. This procedure will be performed at visit 1 (baseline) and visit 3 (16 weeks). In some  
27 volunteers, following FMD, 0.4 mg of sublingual GTN (glyceryl trinitrate) will be administered at visit  
28 1 and visit 3 to determine whether changes in FMD responses following intervention might be due to  
29 changes in smooth muscle reactivity.  
30  
31  
32  
33  
34  
35  
36  
37  
38  
39  
40  
41  
42  
43  
44

### 45 **Transthoracic echocardiography**

46 At visit 1 and 3, echocardiography is also performed to assess LV diastolic function. Images will be  
47 acquired for measures of LV diastolic function including left atrial end-diastolic volumes, pulmonary  
48 vein s/d ratio, mitral valve E/A ratio and E/e'. [29,36] Images will be acquired and analysed by an  
49 operator accredited by the British Society of Echocardiography.  
50  
51  
52  
53  
54

### 55 **CMR**

56 The most accurate and reproducible measurements of LVH are made by CMR. [37] At visits 1 and 3,  
57 CMR in the NITRATE-LVH arm and those that consent in the NITRATE-CBP arm will be used to assess  
58  
59  
60

1  
2  
3 LV mass, volumes and ejection fraction, T1 and T2 mapping, patterns of late gadolinium enhancement  
4 (LGE), aortic distensibility and PWV. Participants will have a peripheral venous cannula inserted and  
5 gadolinium injected at doses up to 0.2 mmol/kg.  
6  
7  
8  
9

10 To allow a thorough assessment of cardiac function, the following imaging sequences will be  
11 undertaken:  
12  
13

- 14 • Scout images, including black and white blood transverse slices of the thorax
- 15 • Long axis cines (4-chamber, 2-chamber, LVOT-1, LVOT-2, aortic valve short axis)
- 16 • Short axis cine stack
- 17 • T1 and T2 mapping
- 18 • LGE in the 4-chamber, 2-chamber, 3-chamber views and short axis stack
- 19 • Post contrast T1 mapping for extra-cellular volume (ECV) quantification
- 20 • Sagittal aortic views and aortic flow sequences for assessment of aortic distensibility and PWV.

21  
22 Short axis images will be acquired using standard sequences i.e. 10 – 12 slices of 8mm thickness with  
23 2mm gap to achieve whole LV coverage. This is undertaken with the patient in held expiration. Cine  
24 and LGE short axis stacks will be acquired using identical scanning geometry to assure correct image  
25 registration.  
26  
27  
28

29 The following offline parameters will be measured:  
30  
31  
32  
33  
34

- 35 • Presence of significant extra cardiac pathology
- 36 • Left ventricular ejection fraction, volumes and mass
- 37 • Distribution of LGE
- 38 • Analysis of pre and post contrast T1 mapping and T2 mapping. Short axis images will be  
39 segmented according to the AHA model as previously described[38]
- 40 • Aortic distensibility and pulse wave velocity.

41  
42 For the analysis of study outcomes, each study will be anonymised by a third party. This will be  
43 separate from the study ID to avoid bias between pre- and post-treatment studies. Documentation of  
44 this anonymisation will be stored on a secure server at the Barts CVCTU, with unblinding for clinical  
45 reasons as necessary. The PI will be informed if this is necessary. Study analysis will occur in batches  
46 to prevent bias. For the assessment of LV volumes and mass, 2 readers will undertake assessment of  
47  
48  
49  
50  
51  
52  
53  
54  
55  
56  
57  
58  
59  
60



inter and intra observer variation prior to analysis of blinded study images. Image analysis will be overseen and adjudicated by an experienced level 3 CMR reader (JCM).

### **End of study definition**

The study will end after the final visit at week 16.

### **STATISTICAL ANALYSIS**

In this study, we intend to recruit 80 patients in each treatment arm with stratification of 80 patients overall recruited to NITRATE-LVH and 80 recruited to the NITRATE-CBP arms (total n=160). This sample size will empower our trial to test for the primary and all major secondary endpoints listed below.

We determined the sample size using G\*Power 3.0. Calculations were based on unpaired t-tests, a significance level of 0.05 (two-tailed) and the relevant standard deviations of the mean difference from published studies with reproducibility data: central systolic BP 1.7 mm Hg,[39] LV mass 9.9g,[40] CMR PWV 0.45 m/s,[41] Vicorder PWV 0.29 m/s.[41] For BP, we used measures of SD of systolic BP (as it has greater SD than diastolic BP) from the placebo limb of our previous intervention trial in hypertensive patients[13]: clinic systolic BP 8.4 mm Hg; ambulatory systolic BP 4.9 mm Hg; home systolic BP 3.9 mm Hg. International consensus documents on the optimal method for ultrasound FMD suggest using lab-specific data in sample size calculation and have suggested that 40 participants in a parallel study are sufficient to determine statistically important differences.[35] In a study of 4 week dietary nitrate intervention in hypertensive patients, SD of repeated measures of FMD in the placebo group was 0.6, whilst the mean difference between the groups was 1.0%[13], a SD of 1.1 .

### **Primary endpoints**

For the individual stratified sub-groups:

**NITRATE-LVH:** For the primary endpoint of LV mass regression we have a power of 95% for detecting a 9g LV mass change (~6% change for a mildly hypertrophied heart of 150 g). Previously published data showed a 10% reduction in LV mass in hypertensives after 3 months treatment with spironolactone.[42] Furthermore, dietary advice aimed at BP reduction in the TOMHS study demonstrated mean 9/9 mm Hg BP reduction and ~20g LV mass reduction from baseline ~200g (by echocardiography) at 3 months post intervention, representing ~10% reduction in LV mass.[43]

1  
2  
3 **NITRATE-CBP:** For non-CMR PWV we have a power of > 95% for detecting a 0.6 m/s absolute change  
4 (previously demonstrated following 4 weeks dietary nitrate in hypertensive patients[13]). For CMR  
5 determined PWV we have a power of > 95% for detecting a 0.6 m/s absolute change.[13] For our  
6 primary end point of reduction in central systolic BP we expect a scaled reduction in BP relative to  
7 observed decreases in brachial BP (8.7 mm Hg clinic brachial systolic BP)[13] though evidence suggests  
8 that low-dose intravenous nitrite infusions act to selectively lower central BP in preference to brachial  
9 BP and therefore expected differences may be larger.[44] Nevertheless, using our conservative  
10 estimate based on two-thirds brachial BP effect, we have > 90% power to detect a 5.8 mm Hg  
11 difference in central systolic BP.  
12  
13  
14  
15  
16  
17  
18  
19

20 In post hoc analyses data will be combined from the 2 groups to assess the overall impact of inorganic  
21 nitrate versus placebo on the entire cohort for BP, nitrate and nitrite analysis. In addition, correlation  
22 analyses will be conducted using Pearson's correlation between measures of NOx, LV mass, BP and  
23 PWV.  
24  
25  
26  
27

### 28 **Secondary endpoints**

29  
30 a) Ultrasound FMD (%), > 90% power for detecting a 1.0% absolute change from a reduced FMD of  
31 ~5%.[13]  
32

33 b) Brachial BP

34  
35 i) Clinic > 85% power to detect 7 mm Hg absolute change.[13]

36 ii) Ambulatory > 95% power to detect 7 mm Hg absolute change.[13]

37  
38 iii) Home > 85% power to detect 7 mm Hg absolute change.[13] The change observed in our 4  
39 week study was ~7 mm Hg[13] but with reduced measurement frequency, the possibility of  
40 increase measurement variability and therefore SD was arbitrarily doubled for this calculation.  
41  
42  
43  
44

45 Our sample size calculations assume a drop-out rate of 15% (non-compliance with dietary intervention  
46 or follow-up visits) based on our centres previous observations.  
47  
48  
49

50 Data will be analysed on an intention to treat basis. The data will be compared by multivariable  
51 regression analysis for each functional measure. The change from baseline in pre-specified primary,  
52 secondary and exploratory outcomes will be compared between groups by Student's t-test. We will  
53 adjust the results for multiple variables: sex, age, weight, body mass index and the initial differences  
54 between groups in LV mass.  
55  
56  
57  
58  
59  
60

### **Ethical considerations**

The NIHR Barts Biomedical Research Centre Patient and Public Advisory Group reviewed this protocol prior to submission to the Research Ethics Committee (REC). The study protocol and any subsequent amendments, along with materials provided to participants and advertising material, was submitted to London - City and East REC. Written approval from the REC was obtained along with final sponsorship and NHS Health Research Authority (HRA) approval.

### **Safety considerations**

The intervention is 70 mL of beetroot juice concentrate or nitrate-deplete beetroot juice (placebo; James White Drinks, UK). The nitrate is extracted using the same anion exchange technique to remove inorganic nitrate from the general drinking water supplies. There are no known serious side effects from these interventions and nitrate-free juice is classified as a foodstuff. In addition, several recent publications using the placebo juice are now available.[45–47] In the unlikely event of a serious adverse event (SAE) occurring directly as a result of the intervention, this would need to be reviewed by the chief investigator and the procedures followed as described below.

### **Safety reporting**

An AE will be documented in the participants' medical notes and the case report form (CRF) and followed up by the investigators. Serious adverse events (SAEs) will be reported to the sponsor and REC where in the opinion of the chief investigator the event was either 'related' (i.e., resulted from administration of research procedures) and 'unexpected' (i.e., the type of event is not an expected occurrence).

SAEs considered to be 'related' and 'unexpected' will be recorded in the participants' notes, the sponsor SAE form and reported to the sponsor's joint research management office (JRMO) within 24 hours of the research team being notified, and to the main REC within 15 days. The co-investigators will be authorised to sign SAE forms in the absence of the PI. The intervention for the participant will be unblinded in the reporting of an 'unexpected and related' SAE, performed by an individual independent of the study procedures and will allow the investigators to remain blinded. The unblinding of single cases will only be performed if necessary for the safety of a participant.

### **MONITORING**

#### **Trial Steering Committee (TSC)**

1  
2  
3 The TSC is composed of three independent experts in the fields of: cardiac MRI, hypertension and  
4 clinical trials along with the investigators and the data monitor and two lay members. This committee  
5 met before participant recruitment and will meet annually to assess safety, feasibility or any other  
6 arising problems and their recommendations followed.  
7  
8  
9

### 10 11 **Data Safety and Monitoring Board (DSMB)**

12 The trial is classified as low-risk and does not require the formal setting up of a DSMB, however a  
13 DSMB has been established comprising a Clinical Trials Physician, Statistician and Cardiovascular  
14 Physician. The DSMB met to review data after 20 patients in each study arm had completed their  
15 involvement, to advise about planned sample size and safety signals. The study will be subject to  
16 monitoring by the Sponsor, Queen Mary University of London, in accordance with their policies. Any  
17 monitoring findings will be relayed to the TSC by the Chief Investigator and acted in the best interest  
18 of patients, sponsor and funder.  
19  
20  
21  
22  
23  
24  
25  
26

### 27 **Ethics and dissemination**

28 The study will be performed in agreement with the Declaration of Helsinki and is approved by the  
29 Local REC (London – City and East; 10/H0703/98). Data collection will be completed by the third  
30 quarter of 2020. Primary and secondary analysis will start immediately after data collection is  
31 completed, with an aim to prepare publications for submission in 2021. The results of the trial will be  
32 published according to the CONSORT statement. Dissemination of results will be in peer-reviewed  
33 journal publications and presentations at national and international conferences. NITRATE-TOD is  
34 registered on Clinicaltrials.gov (NCT03088514).  
35  
36  
37  
38  
39  
40  
41

### 42 **Summary**

43 This is the first randomised-controlled trial assessing the use of prolonged dietary nitrate treatment  
44 in hypertension-induced target organ damage, specifically LVH and arterial stiffness. This study will  
45 determine the potential of prolonged dietary nitrate as adjunctive therapy in patients with sub  
46 optimally controlled hypertension on anti-hypertensive medication.  
47  
48  
49  
50  
51

52 **Contributors:** All authors listed above fulfil all three International Committee of Medical Journal  
53 Editors (ICMJE) guidelines for authorship, which are (1) substantial contributions to conception and  
54 design, acquisition of data or analysis, and interpretation of data; (2) drafting the article or revising it  
55 critically for important intellectual content; and (3) final approval of the version to be published. AA  
56 raised the funding. AA and VK designed the study. CWZL was responsible for coordinating the  
57  
58  
59  
60

1  
2  
3 contribution of all authors to this paper. AA, VK, JM and CWZL developed the protocol. CWZL and  
4 AJPB are involved the acquisition of data or data analysis. CWZL, KR, JC, AS and CP were responsible  
5 for drafting this paper. AM, CD, JM, VK and AA were responsible for editing and providing guidance  
6 on the paper. All authors were responsible for critically revising the paper. All authors approved the  
7 final version of this paper for submission. This study is supported by the CVCTU, a branch of the Barts  
8 CTU UKCRC Reg No. 4.  
9  
10  
11  
12  
13  
14

15 **Funding:** CWZL and this work are funded by a grant from Barts Charity. The Sponsor and funders have  
16 no involvement in the study design, collection of data, writing of this paper or decision to submit this  
17 paper for publication.  
18  
19  
20

21 **Competing interests:** AA is a co-director of Heartbeet Ltd, which is a start-up company that seeks to  
22 identify commercial potential of dietary nitrate.  
23  
24  
25  
26  
27  
28  
29  
30  
31  
32  
33  
34  
35  
36  
37  
38  
39  
40  
41  
42  
43  
44  
45  
46  
47  
48  
49  
50  
51  
52  
53  
54  
55  
56  
57  
58  
59  
60

## REFERENCES

- 1 Lim SS, Vos T, Flaxman AD, *et al.* A comparative risk assessment of burden of disease and injury attributable to 67 risk factors and risk factor clusters in 21 regions, 1990–2010: a systematic analysis for the Global Burden of Disease Study 2010. *Lancet* 2012;**380**:2224–60. doi:10.1016/S0140-6736(12)61766-8
- 2 Forouzanfar MH, Liu P, Roth GA, *et al.* Global Burden of Hypertension and Systolic Blood Pressure of at Least 110 to 115 mm Hg, 1990–2015. *JAMA* 2017;**317**:165. doi:10.1001/jama.2016.19043
- 3 Vos T, Alemu Abajobir A, Hassen Abate K, *et al.* Global, regional, and national incidence, prevalence, and years lived with disability for 328 diseases and injuries for 195 countries, 1990–2016: a systematic analysis for the Global Burden of Disease Study 2016. *Lancet* 2017;**390**:1211–59. <https://vizhub>. (accessed 9 Apr 2019).
- 4 WHO WHO. Global status report on noncommunicable diseases 2014. Geneva: 2014. [http://apps.who.int/iris/bitstream/handle/10665/148114/9789241564854\\_eng.pdf;jsessionid=FD9481BC2C213324152C9CDB8D3740DF?sequence=1](http://apps.who.int/iris/bitstream/handle/10665/148114/9789241564854_eng.pdf;jsessionid=FD9481BC2C213324152C9CDB8D3740DF?sequence=1)
- 5 Appel LJ, Moore TJ, Obarzanek E, *et al.* A Clinical Trial of the Effects of Dietary Patterns on Blood Pressure. *N Engl J Med* 1997;**336**:1117–24. doi:10.1056/NEJM199704173361601
- 6 Joshipura KJ, Hu FB, Manson JE, *et al.* The Effect of Fruit and Vegetable Intake on Risk for Coronary Heart Disease. *Ann Intern Med* 2001;**134**:1106. doi:10.7326/0003-4819-134-12-200106190-00010
- 7 Lundberg JO, Feelisch M, Björne H, *et al.* Cardioprotective effects of vegetables: Is nitrate the answer? *Nitric Oxide* 2006;**15**:359–62. doi:10.1016/j.niox.2006.01.013
- 8 Ghosh SM, Kapil V, Fuentes-Calvo I, *et al.* Enhanced Vasodilator Activity of Nitrite in Hypertension Novelty and Significance. *Hypertension* 2013;**61**.
- 9 Kapil V, Milsom AB, Okorie M, *et al.* Inorganic Nitrate Supplementation Lowers Blood Pressure in Humans. *Hypertension* 2010;**56**:274–81. doi:10.1161/HYPERTENSIONAHA.110.153536
- 10 Webb AJ, Patel N, Loukogeorgakis S, *et al.* Acute blood pressure lowering, vasoprotective, and antiplatelet properties of dietary nitrate via bioconversion to nitrite. *Hypertens (Dallas, Tex 1979)* 2008;**51**:784–90. doi:10.1161/HYPERTENSIONAHA.107.103523
- 11 Tannenbaum SR, Weisman M, Fett D. The effect of nitrate intake on nitrite formation in human saliva. *Food Cosmet Toxicol* 1976;**14**:549–52. <http://www.ncbi.nlm.nih.gov/pubmed/1017770> (accessed 20 Jun 2018).
- 12 Duncan C, Dougall H, Johnston P, *et al.* Chemical generation of nitric oxide in the mouth from the enterosalivary circulation of dietary nitrate. *Nat Med* 1995;**1**:546–51. <http://www.ncbi.nlm.nih.gov/pubmed/7585121> (accessed 20 Jun 2018).
- 13 Kapil V, Khambata RS, Robertson A, *et al.* Dietary nitrate provides sustained blood pressure lowering in hypertensive patients: A randomized, phase 2, double-blind, placebo-controlled study. *Hypertension* 2015;**65**:320–7. doi:10.1161/HYPERTENSIONAHA.114.04675
- 14 Greenwald S. Ageing of the conduit arteries. *J Pathol* 2007;**211**:157–72. doi:10.1002/path.2101
- 15 Laurent S, Cockcroft J, Van Bortel L, *et al.* Expert consensus document on arterial stiffness: methodological issues and clinical applications. *Eur Heart J* 2006;**27**:2588–605. doi:10.1093/eurheartj/ehl254
- 16 Ben-Shlomo Y, Spears M, Boustred C, *et al.* Aortic Pulse Wave Velocity Improves Cardiovascular Event Prediction. *J Am Coll Cardiol* 2014;**63**:636–46. doi:10.1016/j.jacc.2013.09.063
- 17 Boutouyrie P, Laurent S, Briet M. Importance of arterial stiffness as cardiovascular risk factor for future development of new type of drugs. *Fundam Clin Pharmacol* 2008;**22**:241–6. doi:10.1111/j.1472-8206.2008.00584.x

- 1  
2  
3 18 Gradman AH, Alfayoumi F. From Left Ventricular Hypertrophy to Congestive Heart Failure:  
4 Management of Hypertensive Heart Disease. *Prog Cardiovasc Dis* 2006;**48**:326–41.  
5 doi:10.1016/j.pcad.2006.02.001  
6  
7 19 Nadruz W. Myocardial remodeling in hypertension. *J Hum Hypertens* 2015;**29**:1–6.  
8 doi:10.1038/jhh.2014.36  
9  
10 20 Levy D, Garrison RJ, Savage DD, *et al.* Prognostic Implications of Echocardiographically  
11 Determined Left Ventricular Mass in the Framingham Heart Study. *N Engl J Med*  
12 1990;**322**:1561–6. doi:10.1056/NEJM199005313222203  
13  
14 21 Kannel WB. Left ventricular hypertrophy as a risk factor in arterial hypertension. *Eur Heart J*  
15 1992;**13**:82–8. doi:10.1093/eurheartj/13.suppl\_D.82  
16  
17 22 Ruilope LM, Schmieder RE. Left Ventricular Hypertrophy and Clinical Outcomes in  
18 Hypertensive Patients. *Am J Hypertens* 2008;**21**:500–8. doi:10.1038/ajh.2008.16  
19  
20 23 Mathew J, Sleight P, Lonn E, *et al.* Reduction of Cardiovascular Risk by Regression of  
21 Electrocardiographic Markers of Left Ventricular Hypertrophy by the Angiotensin-Converting  
22 Enzyme Inhibitor Ramipril. *Circulation* 2001;**104**:1615–21. doi:10.1161/hc3901.096700  
23  
24 24 Dahlöf B, Devereux RB, Kjeldsen SE, *et al.* Cardiovascular morbidity and mortality in the  
25 Losartan Intervention For Endpoint reduction in hypertension study (LIFE): a randomised trial  
26 against atenolol. *Lancet* 2002;**359**:995–1003. doi:10.1016/S0140-6736(02)08089-3  
27  
28 25 Ruiz-Hurtado G, Delgado C. Nitric oxide pathway in hypertrophied heart: new therapeutic  
29 uses of nitric oxide donors. *J Hypertens* 2010;**28 Suppl 1**:S56–61.  
30 doi:10.1097/01.hjh.0000388496.66330.b8  
31  
32 26 Carlström M, Persson AEG, Larsson E, *et al.* Dietary nitrate attenuates oxidative stress,  
33 prevents cardiac and renal injuries, and reduces blood pressure in salt-induced hypertension.  
34 *Cardiovasc Res* 2011;**89**:574–85. doi:10.1093/cvr/cvq366  
35  
36 27 Bahra M, Kapil V, Pearl V, *et al.* Inorganic nitrate ingestion improves vascular compliance but  
37 does not alter flow-mediated dilatation in healthy volunteers. *Nitric oxide Biol Chem*  
38 2012;**26**:197–202. doi:10.1016/j.niox.2012.01.004  
39  
40 28 Ikonomidis I, Aboyans V, Blacher J, *et al.* The role of ventricular–arterial coupling in cardiac  
41 disease and heart failure: assessment, clinical implications and therapeutic interventions. A  
42 consensus document of the European Society of Cardiology Working Group on Aorta &  
43 Peripheral Vascular Diseases, European Association of Cardiovascular Imaging, and Heart  
44 Failure Association. *Eur J Heart Fail* 2019;**21**:402–24. doi:10.1002/ejhf.1436  
45  
46 29 Lang RM, Badano LP, Mor-Avi V, *et al.* Recommendations for cardiac chamber quantification  
47 by echocardiography in adults: An update from the American society of echocardiography  
48 and the European association of cardiovascular imaging. *Eur Heart J Cardiovasc Imaging*  
49 Published Online First: 2015. doi:10.1093/ehjci/jev014  
50  
51 30 Devereux RB, Alonso DR, Lutas EM, *et al.* Echocardiographic assessment of left ventricular  
52 hypertrophy: comparison to necropsy findings. *Am J Cardiol* 1986;**57**:450–  
53 8.<http://www.ncbi.nlm.nih.gov/pubmed/2936235> (accessed 21 Jun 2018).  
54  
55 31 Ignarro LJ, Fukuto JM, Griscavage JM, *et al.* Oxidation of nitric oxide in aqueous solution to  
56 nitrite but not nitrate: comparison with enzymatically formed nitric oxide from L-arginine.  
57 *Proc Natl Acad Sci U S A* 1993;**90**:8103–7.<http://www.ncbi.nlm.nih.gov/pubmed/7690141>  
58 (accessed 21 Jun 2018).  
59  
60 32 Bush PA, Gonzalez NE, Griscavage JM, *et al.* Nitric oxide synthase from cerebellum catalyzes  
the formation of equimolar quantities of nitric oxide and citrulline from L-arginine. *Biochem  
Biophys Res Commun* 1992;**185**:960–6. doi:10.1016/0006-291X(92)91720-B  
33  
34 33 Hickson SS, Butlin M, Broad J, *et al.* Validity and repeatability of the Vicorder apparatus: a  
comparison with the SphygmoCor device. *Hypertens Res* 2009;**32**:1079–85.  
doi:10.1038/hr.2009.154  
35  
36 34 Celermajer DS, Sorensen KE, Gooch VM, *et al.* Non-invasive detection of endothelial  
dysfunction in children and adults at risk of atherosclerosis. *Lancet* 1992;**340**:1111–5.

- 1  
2  
3 doi:10.1016/0140-6736(92)93147-F
- 4 35 Corretti MC, Anderson TJ, Benjamin EJ, *et al.* Guidelines for the ultrasound assessment of  
5 endothelial-dependent flow-mediated vasodilation of the brachial artery: A report of the  
6 International Brachial Artery Reactivity Task Force. *J Am Coll Cardiol* 2002;**39**:257–65.  
7 doi:10.1016/S0735-1097(01)01746-6
- 8 36 Wharton G, Steeds R, Allen J, *et al.* A minimum dataset for a standard adult transthoracic  
9 echocardiogram: a guideline protocol from the British Society of Echocardiography. Published  
10 Online First: 2015. doi:10.1530/ERP-14-0079
- 11 37 Bottini P, Carr A, Prisant L, *et al.* Magnetic resonance imaging compared to echocardiography  
12 to assess left ventricular mass in the hypertensive patient. *Am J Hypertens* 1995;**8**:221–8.  
13 doi:10.1016/0895-7061(94)00178-E
- 14 38 Treibel TA, Kozor R, Schofield R, *et al.* Reverse Myocardial Remodeling Following Valve  
15 Replacement in Patients With Aortic Stenosis. *J Am Coll Cardiol* 2018;**71**:860–71.  
16 doi:10.1016/j.jacc.2017.12.035
- 17 39 Siebenhofer A, Kemp C, Sutton A, *et al.* The reproducibility of central aortic blood pressure  
18 measurements in healthy subjects using applanation tonometry and sphygmocardiography. *J*  
19 *Hum Hypertens* 1999;**13**:625–9. <http://www.ncbi.nlm.nih.gov/pubmed/10482972> (accessed  
20 23 May 2017).
- 21 40 Hudsmith LE, Petersen SE, Francis JM, *et al.* Normal human left and right ventricular and left  
22 atrial dimensions using steady state free precession magnetic resonance imaging. *J*  
23 *Cardiovasc Magn Reson* 2005;**7**:775–82.
- 24 41 Grotenhuis HB, Westenberg JJM, Steendijk P, *et al.* Validation and reproducibility of aortic  
25 pulse wave velocity as assessed with velocity-encoded MRI. *J Magn Reson Imaging*  
26 2009;**30**:521–6. doi:10.1002/jmri.21886
- 27 42 Gaddam K, Corros C, Pimenta E, *et al.* Rapid Reversal of Left Ventricular Hypertrophy and  
28 Intracardiac Volume Overload in Patients With Resistant Hypertension and  
29 Hyperaldosteronism: A Prospective Clinical Study. *Hypertension* 2010;**55**:1137–42.  
30 doi:10.1161/HYPERTENSIONAHA.109.141531
- 31 43 Liebson PR, Grandits GA, Dianzumba S, *et al.* Comparison of five antihypertensive  
32 monotherapies and placebo for change in left ventricular mass in patients receiving  
33 nutritional-hygienic therapy in the Treatment of Mild Hypertension Study (TOMHS).  
34 *Circulation* 1995;**91**:698–706. <http://www.ncbi.nlm.nih.gov/pubmed/7828296> (accessed 21  
35 Jun 2018).
- 36 44 Omar SA, Fok H, Tilgner KD, *et al.* Paradoxical Normoxia-Dependent Selective Actions of  
37 Inorganic Nitrite in Human Muscular Conduit Arteries and Related Selective Actions on  
38 Central Blood Pressures. *Circulation*  
39 2015;**131**. <http://circ.ahajournals.org/content/131/4/381.long> (accessed 23 May 2017).
- 40 45 Gilchrist M, Winyard PG, Fulford J, *et al.* Dietary nitrate supplementation improves reaction  
41 time in type 2 diabetes: Development and application of a novel nitrate-depleted beetroot  
42 juice placebo. *Nitric Oxide* 2014;**40**:67–74. doi:10.1016/j.niox.2014.05.003
- 43 46 Gilchrist M, Winyard PG, Aizawa K, *et al.* Effect of dietary nitrate on blood pressure,  
44 endothelial function, and insulin sensitivity in type 2 diabetes. *Free Radic Biol Med*  
45 2013;**60**:89–97. doi:10.1016/j.freeradbiomed.2013.01.024
- 46 47 Lansley KE, Winyard PG, Bailey SJ, *et al.* Acute dietary nitrate supplementation improves  
47 cycling time trial performance. *Med Sci Sports Exerc* 2011;**43**:1125–31.  
48 doi:10.1249/MSS.0b013e31821597b4
- 49  
50  
51  
52  
53  
54  
55  
56  
57  
58  
59  
60



1  
2  
3 **Figure 1 Legend**  
4  
5

6 **Figure 1.** Study protocol. ABPM, ambulatory blood pressure monitor; ECG, electrocardiogram; CMR,  
7 cardiovascular magnetic resonance imaging; FMD, flow mediated dilation; PWA, pulse wave analysis;  
8 PWV, pulse wave velocity.  
9  
10  
11  
12  
13  
14  
15  
16  
17  
18  
19  
20  
21  
22  
23  
24  
25  
26  
27  
28  
29  
30  
31  
32  
33  
34  
35  
36  
37  
38  
39  
40  
41  
42  
43  
44  
45  
46  
47  
48  
49  
50  
51  
52  
53  
54  
55  
56  
57  
58  
59  
60

For peer review only

BMJ Open  
Screening

1  
2  
3  
4  
5  
6  
7  
8  
9  
10  
11  
12  
13  
14  
15  
16  
17  
18  
19  
20  
21  
22  
23  
24





SPIRIT 2013 Checklist: Recommended items to address in a clinical trial protocol and related documents\*

| Section/item                      | Item No | Description                                                                                                                                                                                                                                                                              | Page             | Line no. |
|-----------------------------------|---------|------------------------------------------------------------------------------------------------------------------------------------------------------------------------------------------------------------------------------------------------------------------------------------------|------------------|----------|
| <b>Administrative information</b> |         |                                                                                                                                                                                                                                                                                          |                  |          |
| Title                             | 1       | Descriptive title identifying the study design, population, interventions, and, if applicable, trial acronym                                                                                                                                                                             | 1                | 1        |
| Trial registration                | 2a      | Trial identifier and registry name. If not yet registered, name of intended registry                                                                                                                                                                                                     | 2                | 31       |
|                                   | 2b      | All items from the World Health Organization Trial Registration Data Set                                                                                                                                                                                                                 | In full protocol |          |
| Protocol version                  | 3       | Date and version identifier                                                                                                                                                                                                                                                              | In full protocol |          |
| Funding                           | 4       | Sources and types of financial, material, and other support                                                                                                                                                                                                                              | 17               | 9        |
| Roles and responsibilities        | 5a      | Names, affiliations, and roles of protocol contributors                                                                                                                                                                                                                                  | 1                | 5        |
|                                   | 5b      | Name and contact information for the trial sponsor                                                                                                                                                                                                                                       | 1                | 16       |
|                                   | 5c      | Role of study sponsor and funders, if any, in study design; collection, management, analysis, and interpretation of data; writing of the report; and the decision to submit the report for publication, including whether they will have ultimate authority over any of these activities | In full protocol |          |

|    |                                                           |     |                                                                                                                                                                                                                                                                  |    |    |
|----|-----------------------------------------------------------|-----|------------------------------------------------------------------------------------------------------------------------------------------------------------------------------------------------------------------------------------------------------------------|----|----|
| 1  |                                                           |     |                                                                                                                                                                                                                                                                  |    |    |
| 2  |                                                           |     |                                                                                                                                                                                                                                                                  |    |    |
| 3  |                                                           |     |                                                                                                                                                                                                                                                                  |    |    |
| 4  |                                                           | 5d  | Composition, roles, and responsibilities of the coordinating centre, steering committee, endpoint adjudication committee, data management team, and other individuals or groups overseeing the trial, if applicable (see Item 21a for data monitoring committee) | 16 | 1  |
| 5  |                                                           |     |                                                                                                                                                                                                                                                                  |    |    |
| 6  |                                                           |     |                                                                                                                                                                                                                                                                  |    |    |
| 7  |                                                           |     |                                                                                                                                                                                                                                                                  |    |    |
| 8  |                                                           |     |                                                                                                                                                                                                                                                                  |    |    |
| 9  | <b>Introduction</b>                                       |     |                                                                                                                                                                                                                                                                  |    |    |
| 10 |                                                           |     |                                                                                                                                                                                                                                                                  |    |    |
| 11 | Background and rationale                                  | 6a  | Description of research question and justification for undertaking the trial, including summary of relevant studies (published and unpublished) examining benefits and harms for each intervention                                                               | 4  | 78 |
| 12 |                                                           |     |                                                                                                                                                                                                                                                                  |    |    |
| 13 |                                                           | 6b  | Explanation for choice of comparators                                                                                                                                                                                                                            | 5  | 15 |
| 14 |                                                           |     |                                                                                                                                                                                                                                                                  |    |    |
| 15 | Objectives                                                | 7   | Specific objectives or hypotheses                                                                                                                                                                                                                                | 6  | 2  |
| 16 |                                                           |     |                                                                                                                                                                                                                                                                  |    |    |
| 17 | Trial design                                              | 8   | Description of trial design including type of trial (eg, parallel group, crossover, factorial, single group), allocation ratio, and framework (eg, superiority, equivalence, noninferiority, exploratory)                                                        | 9  | 5  |
| 18 |                                                           |     |                                                                                                                                                                                                                                                                  |    |    |
| 19 |                                                           |     |                                                                                                                                                                                                                                                                  |    |    |
| 20 |                                                           |     |                                                                                                                                                                                                                                                                  |    |    |
| 21 |                                                           |     |                                                                                                                                                                                                                                                                  |    |    |
| 22 |                                                           |     |                                                                                                                                                                                                                                                                  |    |    |
| 23 |                                                           |     |                                                                                                                                                                                                                                                                  |    |    |
| 24 | <b>Methods: Participants, interventions, and outcomes</b> |     |                                                                                                                                                                                                                                                                  |    |    |
| 25 |                                                           |     |                                                                                                                                                                                                                                                                  |    |    |
| 26 | Study setting                                             | 9   | Description of study settings (eg, community clinic, academic hospital) and list of countries where data will be collected. Reference to where list of study sites can be obtained                                                                               | 9  | 15 |
| 27 |                                                           |     |                                                                                                                                                                                                                                                                  |    |    |
| 28 |                                                           |     |                                                                                                                                                                                                                                                                  |    |    |
| 29 | Eligibility criteria                                      | 10  | Inclusion and exclusion criteria for participants. If applicable, eligibility criteria for study centres and individuals who will perform the interventions (eg, surgeons, psychotherapists)                                                                     | 7  | 2  |
| 30 |                                                           |     |                                                                                                                                                                                                                                                                  |    |    |
| 31 |                                                           |     |                                                                                                                                                                                                                                                                  |    |    |
| 32 | Interventions                                             | 11a | Interventions for each group with sufficient detail to allow replication, including how and when they will be administered                                                                                                                                       | 9  | 16 |
| 33 |                                                           |     |                                                                                                                                                                                                                                                                  |    |    |
| 34 |                                                           |     |                                                                                                                                                                                                                                                                  |    |    |
| 35 |                                                           | 11b | Criteria for discontinuing or modifying allocated interventions for a given trial participant (eg, drug dose change in response to harms, participant request, or improving/worsening disease)                                                                   | 15 | 32 |
| 36 |                                                           |     |                                                                                                                                                                                                                                                                  |    |    |
| 37 |                                                           |     |                                                                                                                                                                                                                                                                  |    |    |
| 38 |                                                           |     |                                                                                                                                                                                                                                                                  |    |    |
| 39 |                                                           |     |                                                                                                                                                                                                                                                                  |    |    |
| 40 |                                                           |     |                                                                                                                                                                                                                                                                  |    |    |
| 41 |                                                           |     |                                                                                                                                                                                                                                                                  |    |    |
| 42 |                                                           |     |                                                                                                                                                                                                                                                                  |    |    |
| 43 |                                                           |     |                                                                                                                                                                                                                                                                  |    |    |
| 44 |                                                           |     |                                                                                                                                                                                                                                                                  |    |    |
| 45 |                                                           |     |                                                                                                                                                                                                                                                                  |    |    |
| 46 |                                                           |     |                                                                                                                                                                                                                                                                  |    |    |

NITRATE-TOD SPIRIT checklist V2.0 11/11/2019

|    |                      |     |                                                                                                                                                                                                                                                                                                                                                                                |          |    |
|----|----------------------|-----|--------------------------------------------------------------------------------------------------------------------------------------------------------------------------------------------------------------------------------------------------------------------------------------------------------------------------------------------------------------------------------|----------|----|
| 1  |                      |     |                                                                                                                                                                                                                                                                                                                                                                                |          |    |
| 2  |                      |     |                                                                                                                                                                                                                                                                                                                                                                                |          |    |
| 3  |                      |     |                                                                                                                                                                                                                                                                                                                                                                                |          |    |
| 4  |                      | 11c | Strategies to improve adherence to intervention protocols, and any procedures for monitoring adherence (eg, drug tablet return, laboratory tests)                                                                                                                                                                                                                              | 9        | 22 |
| 5  |                      |     |                                                                                                                                                                                                                                                                                                                                                                                |          |    |
| 6  |                      |     |                                                                                                                                                                                                                                                                                                                                                                                |          |    |
| 7  |                      | 11d | Relevant concomitant care and interventions that are permitted or prohibited during the trial                                                                                                                                                                                                                                                                                  | NA       | NA |
| 8  |                      |     |                                                                                                                                                                                                                                                                                                                                                                                |          |    |
| 9  | Outcomes             | 12  | Primary, secondary, and other outcomes, including the specific measurement variable (eg, systolic blood pressure), analysis metric (eg, change from baseline, final value, time to event), method of aggregation (eg, median, proportion), and time point for each outcome. Explanation of the clinical relevance of chosen efficacy and harm outcomes is strongly recommended | 6        | 19 |
| 10 |                      |     |                                                                                                                                                                                                                                                                                                                                                                                |          |    |
| 11 |                      |     |                                                                                                                                                                                                                                                                                                                                                                                |          |    |
| 12 |                      |     |                                                                                                                                                                                                                                                                                                                                                                                |          |    |
| 13 |                      |     |                                                                                                                                                                                                                                                                                                                                                                                |          |    |
| 14 | Participant timeline | 13  | Time schedule of enrolment, interventions (including any run-ins and washouts), assessments, and visits for participants. A schematic diagram is highly recommended (see Figure)                                                                                                                                                                                               | Figure 1 |    |
| 15 |                      |     |                                                                                                                                                                                                                                                                                                                                                                                |          |    |
| 16 |                      |     |                                                                                                                                                                                                                                                                                                                                                                                |          |    |
| 17 |                      |     |                                                                                                                                                                                                                                                                                                                                                                                |          |    |
| 18 | Sample size          | 14  | Estimated number of participants needed to achieve study objectives and how it was determined, including clinical and statistical assumptions supporting any sample size calculations                                                                                                                                                                                          | 13       | 11 |
| 19 |                      |     |                                                                                                                                                                                                                                                                                                                                                                                |          |    |
| 20 |                      |     |                                                                                                                                                                                                                                                                                                                                                                                |          |    |
| 21 | Recruitment          | 15  | Strategies for achieving adequate participant enrolment to reach target sample size                                                                                                                                                                                                                                                                                            | 6        | 10 |
| 22 |                      |     |                                                                                                                                                                                                                                                                                                                                                                                |          |    |

### Methods: Assignment of interventions (for controlled trials)

#### Allocation:

|    |                                  |     |                                                                                                                                                                                                                                                                                                                                                          |                  |    |
|----|----------------------------------|-----|----------------------------------------------------------------------------------------------------------------------------------------------------------------------------------------------------------------------------------------------------------------------------------------------------------------------------------------------------------|------------------|----|
| 25 |                                  |     |                                                                                                                                                                                                                                                                                                                                                          |                  |    |
| 26 |                                  |     |                                                                                                                                                                                                                                                                                                                                                          |                  |    |
| 27 | Sequence generation              | 16a | Method of generating the allocation sequence (eg, computer-generated random numbers), and list of any factors for stratification. To reduce predictability of a random sequence, details of any planned restriction (eg, blocking) should be provided in a separate document that is unavailable to those who enrol participants or assign interventions | 9                | 25 |
| 28 |                                  |     |                                                                                                                                                                                                                                                                                                                                                          |                  |    |
| 29 |                                  |     |                                                                                                                                                                                                                                                                                                                                                          |                  |    |
| 30 |                                  |     |                                                                                                                                                                                                                                                                                                                                                          |                  |    |
| 31 |                                  |     |                                                                                                                                                                                                                                                                                                                                                          |                  |    |
| 32 |                                  |     |                                                                                                                                                                                                                                                                                                                                                          |                  |    |
| 33 | Allocation concealment mechanism | 16b | Mechanism of implementing the allocation sequence (eg, central telephone; sequentially numbered, opaque, sealed envelopes), describing any steps to conceal the sequence until interventions are assigned                                                                                                                                                | 9                | 25 |
| 34 |                                  |     |                                                                                                                                                                                                                                                                                                                                                          |                  |    |
| 35 |                                  |     |                                                                                                                                                                                                                                                                                                                                                          |                  |    |
| 36 |                                  |     |                                                                                                                                                                                                                                                                                                                                                          |                  |    |
| 37 | Implementation                   | 16c | Who will generate the allocation sequence, who will enrol participants, and who will assign participants to interventions                                                                                                                                                                                                                                | In full protocol |    |
| 38 |                                  |     |                                                                                                                                                                                                                                                                                                                                                          |                  |    |
| 39 |                                  |     |                                                                                                                                                                                                                                                                                                                                                          |                  |    |
| 40 |                                  |     |                                                                                                                                                                                                                                                                                                                                                          |                  |    |
| 41 |                                  |     |                                                                                                                                                                                                                                                                                                                                                          |                  |    |
| 42 |                                  |     |                                                                                                                                                                                                                                                                                                                                                          |                  |    |

NITRATE-TOD SPIRIT checklist V2.0 11/11/2019

|   |                    |     |                                                                                                                                                      |   |    |
|---|--------------------|-----|------------------------------------------------------------------------------------------------------------------------------------------------------|---|----|
| 1 |                    |     |                                                                                                                                                      |   |    |
| 2 |                    |     |                                                                                                                                                      |   |    |
| 3 |                    |     |                                                                                                                                                      |   |    |
| 4 | Blinding (masking) | 17a | Who will be blinded after assignment to interventions (eg, trial participants, care providers, outcome assessors, data analysts), and how            | 9 | 5  |
| 5 |                    |     |                                                                                                                                                      |   |    |
| 6 |                    |     |                                                                                                                                                      |   |    |
| 7 |                    | 17b | If blinded, circumstances under which unblinding is permissible, and procedure for revealing a participant's allocated intervention during the trial | 9 | 25 |
| 8 |                    |     |                                                                                                                                                      |   |    |
| 9 |                    |     |                                                                                                                                                      |   |    |

### Methods: Data collection, management, and analysis

|    |                         |     |                                                                                                                                                                                                                                                                                                                                                                                                              |         |          |
|----|-------------------------|-----|--------------------------------------------------------------------------------------------------------------------------------------------------------------------------------------------------------------------------------------------------------------------------------------------------------------------------------------------------------------------------------------------------------------|---------|----------|
| 10 |                         |     |                                                                                                                                                                                                                                                                                                                                                                                                              |         |          |
| 11 |                         |     |                                                                                                                                                                                                                                                                                                                                                                                                              |         |          |
| 12 | Data collection methods | 18a | Plans for assessment and collection of outcome, baseline, and other trial data, including any related processes to promote data quality (eg, duplicate measurements, training of assessors) and a description of study instruments (eg, questionnaires, laboratory tests) along with their reliability and validity, if known. Reference to where data collection forms can be found, if not in the protocol | 10      | 11       |
| 13 |                         |     |                                                                                                                                                                                                                                                                                                                                                                                                              |         |          |
| 14 |                         |     |                                                                                                                                                                                                                                                                                                                                                                                                              |         |          |
| 15 |                         |     |                                                                                                                                                                                                                                                                                                                                                                                                              |         |          |
| 16 |                         |     |                                                                                                                                                                                                                                                                                                                                                                                                              |         |          |
| 17 |                         |     |                                                                                                                                                                                                                                                                                                                                                                                                              |         |          |
| 18 |                         | 18b | Plans to promote participant retention and complete follow-up, including list of any outcome data to be collected for participants who discontinue or deviate from intervention protocols                                                                                                                                                                                                                    | 14      | 32       |
| 19 |                         |     |                                                                                                                                                                                                                                                                                                                                                                                                              |         |          |
| 20 |                         |     |                                                                                                                                                                                                                                                                                                                                                                                                              |         |          |
| 21 | Data management         | 19  | Plans for data entry, coding, security, and storage, including any related processes to promote data quality (eg, double data entry; range checks for data values). Reference to where details of data management procedures can be found, if not in the protocol                                                                                                                                            | In full | protocol |
| 22 |                         |     |                                                                                                                                                                                                                                                                                                                                                                                                              |         |          |
| 23 |                         |     |                                                                                                                                                                                                                                                                                                                                                                                                              |         |          |
| 24 |                         |     |                                                                                                                                                                                                                                                                                                                                                                                                              |         |          |
| 25 | Statistical methods     | 20a | Statistical methods for analysing primary and secondary outcomes. Reference to where other details of the statistical analysis plan can be found, if not in the protocol                                                                                                                                                                                                                                     | 13      | 9        |
| 26 |                         |     |                                                                                                                                                                                                                                                                                                                                                                                                              |         |          |
| 27 |                         |     |                                                                                                                                                                                                                                                                                                                                                                                                              |         |          |
| 28 |                         |     |                                                                                                                                                                                                                                                                                                                                                                                                              |         |          |
| 29 |                         | 20b | Methods for any additional analyses (eg, subgroup and adjusted analyses)                                                                                                                                                                                                                                                                                                                                     | 13      | 9        |
| 30 |                         |     |                                                                                                                                                                                                                                                                                                                                                                                                              |         |          |
| 31 |                         | 20c | Definition of analysis population relating to protocol non-adherence (eg, as randomised analysis), and any statistical methods to handle missing data (eg, multiple imputation)                                                                                                                                                                                                                              | 13      | 9        |
| 32 |                         |     |                                                                                                                                                                                                                                                                                                                                                                                                              |         |          |
| 33 |                         |     |                                                                                                                                                                                                                                                                                                                                                                                                              |         |          |

### Methods: Monitoring

NITRATE-TOD SPIRIT checklist V2.0 11/11/2019

|    |                                 |     |                                                                                                                                                                                                                                                                                                                                       |         |          |
|----|---------------------------------|-----|---------------------------------------------------------------------------------------------------------------------------------------------------------------------------------------------------------------------------------------------------------------------------------------------------------------------------------------|---------|----------|
| 1  |                                 |     |                                                                                                                                                                                                                                                                                                                                       |         |          |
| 2  |                                 |     |                                                                                                                                                                                                                                                                                                                                       |         |          |
| 3  |                                 |     |                                                                                                                                                                                                                                                                                                                                       |         |          |
| 4  | Data monitoring                 | 21a | Composition of data monitoring committee (DMC); summary of its role and reporting structure; statement of whether it is independent from the sponsor and competing interests; and reference to where further details about its charter can be found, if not in the protocol. Alternatively, an explanation of why a DMC is not needed | 16      | 9        |
| 5  |                                 |     |                                                                                                                                                                                                                                                                                                                                       |         |          |
| 6  |                                 |     |                                                                                                                                                                                                                                                                                                                                       |         |          |
| 7  |                                 |     |                                                                                                                                                                                                                                                                                                                                       |         |          |
| 8  |                                 |     |                                                                                                                                                                                                                                                                                                                                       |         |          |
| 9  |                                 | 21b | Description of any interim analyses and stopping guidelines, including who will have access to these interim results and make the final decision to terminate the trial                                                                                                                                                               | In full | protocol |
| 10 |                                 |     |                                                                                                                                                                                                                                                                                                                                       |         |          |
| 11 |                                 |     |                                                                                                                                                                                                                                                                                                                                       |         |          |
| 12 | Harms                           | 22  | Plans for collecting, assessing, reporting, and managing solicited and spontaneously reported adverse events and other unintended effects of trial interventions or trial conduct                                                                                                                                                     | 15      | 20       |
| 13 |                                 |     |                                                                                                                                                                                                                                                                                                                                       |         |          |
| 14 |                                 |     |                                                                                                                                                                                                                                                                                                                                       |         |          |
| 15 |                                 |     |                                                                                                                                                                                                                                                                                                                                       |         |          |
| 16 | Auditing                        | 23  | Frequency and procedures for auditing trial conduct, if any, and whether the process will be independent from investigators and the sponsor                                                                                                                                                                                           | In full | protocol |
| 17 |                                 |     |                                                                                                                                                                                                                                                                                                                                       |         |          |
| 18 |                                 |     |                                                                                                                                                                                                                                                                                                                                       |         |          |
| 19 | <b>Ethics and dissemination</b> |     |                                                                                                                                                                                                                                                                                                                                       |         |          |
| 20 |                                 |     |                                                                                                                                                                                                                                                                                                                                       |         |          |
| 21 | Research ethics approval        | 24  | Plans for seeking research ethics committee/institutional review board (REC/IRB) approval                                                                                                                                                                                                                                             | 15      | 4        |
| 22 |                                 |     |                                                                                                                                                                                                                                                                                                                                       |         |          |
| 23 |                                 |     |                                                                                                                                                                                                                                                                                                                                       |         |          |
| 24 | Protocol amendments             | 25  | Plans for communicating important protocol modifications (eg, changes to eligibility criteria, outcomes, analyses) to relevant parties (eg, investigators, REC/IRBs, trial participants, trial registries, journals, regulators)                                                                                                      | In full | protocol |
| 25 |                                 |     |                                                                                                                                                                                                                                                                                                                                       |         |          |
| 26 |                                 |     |                                                                                                                                                                                                                                                                                                                                       |         |          |
| 27 |                                 |     |                                                                                                                                                                                                                                                                                                                                       |         |          |
| 28 |                                 |     |                                                                                                                                                                                                                                                                                                                                       |         |          |
| 29 | Consent or assent               | 26a | Who will obtain informed consent or assent from potential trial participants or authorised surrogates, and how (see Item 32)                                                                                                                                                                                                          | In full | protocol |
| 30 |                                 |     |                                                                                                                                                                                                                                                                                                                                       |         |          |
| 31 |                                 |     |                                                                                                                                                                                                                                                                                                                                       |         |          |
| 32 |                                 | 26b | Additional consent provisions for collection and use of participant data and biological specimens in ancillary studies, if applicable                                                                                                                                                                                                 | NA      |          |
| 33 |                                 |     |                                                                                                                                                                                                                                                                                                                                       |         |          |
| 34 |                                 |     |                                                                                                                                                                                                                                                                                                                                       |         |          |
| 35 | Confidentiality                 | 27  | How personal information about potential and enrolled participants will be collected, shared, and maintained in order to protect confidentiality before, during, and after the trial                                                                                                                                                  | In full | protocol |
| 36 |                                 |     |                                                                                                                                                                                                                                                                                                                                       |         |          |
| 37 |                                 |     |                                                                                                                                                                                                                                                                                                                                       |         |          |
| 38 |                                 |     |                                                                                                                                                                                                                                                                                                                                       |         |          |
| 39 |                                 |     |                                                                                                                                                                                                                                                                                                                                       |         |          |
| 40 |                                 |     |                                                                                                                                                                                                                                                                                                                                       |         |          |
| 41 |                                 |     |                                                                                                                                                                                                                                                                                                                                       |         |          |
| 42 |                                 |     |                                                                                                                                                                                                                                                                                                                                       |         |          |
| 43 |                                 |     |                                                                                                                                                                                                                                                                                                                                       |         |          |
| 44 |                                 |     |                                                                                                                                                                                                                                                                                                                                       |         |          |
| 45 |                                 |     |                                                                                                                                                                                                                                                                                                                                       |         |          |
| 46 |                                 |     |                                                                                                                                                                                                                                                                                                                                       |         |          |

## NITRATE-TOD SPIRIT checklist V2.0 11/11/2019

|    |                     |     |                                                                                                            |            |    |
|----|---------------------|-----|------------------------------------------------------------------------------------------------------------|------------|----|
| 1  |                     |     |                                                                                                            |            |    |
| 2  |                     |     |                                                                                                            |            |    |
| 3  |                     |     |                                                                                                            |            |    |
| 4  | Declaration of      | 28  | Financial and other competing interests for principal investigators for the overall trial and each         | 17         | 11 |
| 5  | interests           |     | study site                                                                                                 |            |    |
| 6  |                     |     |                                                                                                            |            |    |
| 7  | Access to data      | 29  | Statement of who will have access to the final trial dataset, and disclosure of contractual                | In full    |    |
| 8  |                     |     | agreements that limit such access for investigators                                                        | protocol   |    |
| 9  |                     |     |                                                                                                            |            |    |
| 10 | Ancillary and post- | 30  | Provisions, if any, for ancillary and post-trial care, and for compensation to those who suffer harm       | In full    |    |
| 11 | trial care          |     | from trial participation                                                                                   | protocol   |    |
| 12 |                     |     |                                                                                                            |            |    |
| 13 | Dissemination       | 31a | Plans for investigators and sponsor to communicate trial results to participants, healthcare               | 16         | 18 |
| 14 | policy              |     | professionals, the public, and other relevant groups (eg, via publication, reporting in results            |            |    |
| 15 |                     |     | databases, or other data sharing arrangements), including any publication restrictions                     |            |    |
| 16 |                     |     |                                                                                                            |            |    |
| 17 |                     |     |                                                                                                            |            |    |
| 18 |                     | 31b | Authorship eligibility guidelines and any intended use of professional writers                             | 16         | 33 |
| 19 |                     |     |                                                                                                            |            |    |
| 20 |                     | 31c | Plans, if any, for granting public access to the full protocol, participant-level dataset, and statistical | NA         |    |
| 21 |                     |     | code                                                                                                       |            |    |
| 22 |                     |     |                                                                                                            |            |    |
| 23 | <b>Appendices</b>   |     |                                                                                                            |            |    |
| 24 |                     |     |                                                                                                            |            |    |
| 25 | Informed consent    | 32  | Model consent form and other related documentation given to participants and authorised                    | In         |    |
| 26 | materials           |     | surrogates                                                                                                 | Supplement |    |
| 27 |                     |     |                                                                                                            |            |    |
| 28 | Biological          | 33  | Plans for collection, laboratory evaluation, and storage of biological specimens for genetic or            | 10         | 11 |
| 29 | specimens           |     | molecular analysis in the current trial and for future use in ancillary studies, if applicable             |            |    |
| 30 |                     |     |                                                                                                            |            |    |

\*It is strongly recommended that this checklist be read in conjunction with the SPIRIT 2013 Explanation & Elaboration for important clarification on the items. Amendments to the protocol should be tracked and dated. The SPIRIT checklist is copyrighted by the SPIRIT Group under the Creative Commons "[Attribution-NonCommercial-NoDerivs 3.0 Unported](https://creativecommons.org/licenses/by-nc-nd/3.0/)" license.





## CONSORT 2010 checklist of information to include when reporting a randomised trial\*

| Section/Topic                    | Item No | Checklist item                                                                                                                                                                              | Reported on page No |
|----------------------------------|---------|---------------------------------------------------------------------------------------------------------------------------------------------------------------------------------------------|---------------------|
| <b>Title and abstract</b>        |         |                                                                                                                                                                                             |                     |
|                                  | 1a      | Identification as a randomised trial in the title                                                                                                                                           | 1                   |
|                                  | 1b      | Structured summary of trial design, methods, results, and conclusions (for specific guidance see CONSORT for abstracts)                                                                     | 2                   |
| <b>Introduction</b>              |         |                                                                                                                                                                                             |                     |
| Background and objectives        | 2a      | Scientific background and explanation of rationale                                                                                                                                          | 4                   |
|                                  | 2b      | Specific objectives or hypotheses                                                                                                                                                           | 6                   |
| <b>Methods</b>                   |         |                                                                                                                                                                                             |                     |
| Trial design                     | 3a      | Description of trial design (such as parallel, factorial) including allocation ratio                                                                                                        | 9                   |
|                                  | 3b      | Important changes to methods after trial commencement (such as eligibility criteria), with reasons                                                                                          | 7                   |
| Participants                     | 4a      | Eligibility criteria for participants                                                                                                                                                       | 7                   |
|                                  | 4b      | Settings and locations where the data were collected                                                                                                                                        | 9                   |
| Interventions                    | 5       | The interventions for each group with sufficient details to allow replication, including how and when they were actually administered                                                       | 9                   |
| Outcomes                         | 6a      | Completely defined pre-specified primary and secondary outcome measures, including how and when they were assessed                                                                          | 6                   |
|                                  | 6b      | Any changes to trial outcomes after the trial commenced, with reasons                                                                                                                       | NA                  |
| Sample size                      | 7a      | How sample size was determined                                                                                                                                                              | 13                  |
|                                  | 7b      | When applicable, explanation of any interim analyses and stopping guidelines                                                                                                                | NA                  |
| <b>Randomisation:</b>            |         |                                                                                                                                                                                             |                     |
| Sequence generation              | 8a      | Method used to generate the random allocation sequence                                                                                                                                      | 9                   |
|                                  | 8b      | Type of randomisation; details of any restriction (such as blocking and block size)                                                                                                         | 9                   |
| Allocation concealment mechanism | 9       | Mechanism used to implement the random allocation sequence (such as sequentially numbered containers), describing any steps taken to conceal the sequence until interventions were assigned | 9                   |
| Implementation                   | 10      | Who generated the random allocation sequence, who enrolled participants, and who assigned participants to interventions                                                                     | 9                   |
| Blinding                         | 11a     | If done, who was blinded after assignment to interventions (for example, participants, care providers, those                                                                                | 9                   |

|    |                          |                                                             |                                                                                                                  |
|----|--------------------------|-------------------------------------------------------------|------------------------------------------------------------------------------------------------------------------|
| 1  |                          | assessing outcomes) and how                                 |                                                                                                                  |
| 2  | 11b                      | If relevant, description of the similarity of interventions | 9                                                                                                                |
| 3  | Statistical methods      | 12a                                                         | Statistical methods used to compare groups for primary and secondary outcomes                                    |
| 4  |                          | 12b                                                         | Methods for additional analyses, such as subgroup analyses and adjusted analyses                                 |
| 5  |                          |                                                             | 14                                                                                                               |
| 6  | <b>Results</b>           |                                                             |                                                                                                                  |
| 7  | Participant flow (a      | 13a                                                         | For each group, the numbers of participants who were randomly assigned, received intended treatment, and         |
| 8  | diagram is strongly      |                                                             | were analysed for the primary outcome                                                                            |
| 9  | recommended)             | 13b                                                         | For each group, losses and exclusions after randomisation, together with reasons                                 |
| 10 | Recruitment              | 14a                                                         | Dates defining the periods of recruitment and follow-up                                                          |
| 11 |                          | 14b                                                         | Why the trial ended or was stopped                                                                               |
| 12 | Baseline data            | 15                                                          | A table showing baseline demographic and clinical characteristics for each group                                 |
| 13 | Numbers analysed         | 16                                                          | For each group, number of participants (denominator) included in each analysis and whether the analysis was      |
| 14 |                          |                                                             | by original assigned groups                                                                                      |
| 15 | Outcomes and             | 17a                                                         | For each primary and secondary outcome, results for each group, and the estimated effect size and its            |
| 16 | estimation               |                                                             | precision (such as 95% confidence interval)                                                                      |
| 17 |                          | 17b                                                         | For binary outcomes, presentation of both absolute and relative effect sizes is recommended                      |
| 18 | Ancillary analyses       | 18                                                          | Results of any other analyses performed, including subgroup analyses and adjusted analyses, distinguishing       |
| 19 |                          |                                                             | pre-specified from exploratory                                                                                   |
| 20 | Harms                    | 19                                                          | All important harms or unintended effects in each group (for specific guidance see CONSORT for harms)            |
| 21 |                          |                                                             | NA                                                                                                               |
| 22 | <b>Discussion</b>        |                                                             |                                                                                                                  |
| 23 | Limitations              | 20                                                          | Trial limitations, addressing sources of potential bias, imprecision, and, if relevant, multiplicity of analyses |
| 24 | Generalisability         | 21                                                          | Generalisability (external validity, applicability) of the trial findings                                        |
| 25 | Interpretation           | 22                                                          | Interpretation consistent with results, balancing benefits and harms, and considering other relevant evidence    |
| 26 |                          |                                                             | NA                                                                                                               |
| 27 | <b>Other information</b> |                                                             |                                                                                                                  |
| 28 | Registration             | 23                                                          | Registration number and name of trial registry                                                                   |
| 29 | Protocol                 | 24                                                          | Where the full trial protocol can be accessed, if available                                                      |
| 30 | Funding                  | 25                                                          | Sources of funding and other support (such as supply of drugs), role of funders                                  |
| 31 |                          |                                                             | 16                                                                                                               |
| 32 |                          |                                                             | 16                                                                                                               |
| 33 |                          |                                                             | 17                                                                                                               |

36  
37 \*We strongly recommend reading this statement in conjunction with the CONSORT 2010 Explanation and Elaboration for important clarifications on all the items. If relevant, we also  
38 recommend reading CONSORT extensions for cluster randomised trials, non-inferiority and equivalence trials, non-pharmacological treatments, herbal interventions, and pragmatic trials.  
39 Additional extensions are forthcoming: for those and for up to date references relevant to this checklist, see [www.consort-statement.org](http://www.consort-statement.org).  
40  
41  
42
